# Supplementary material for: Multiplex glycan bead array for high throughput and high content analyses of glycan binding proteins
Source: PubMed Central journal article supplement (PMC5772357; doi:10.1038/s41467-017-02747-y), 2018-01-17
Supplement: 41467_2017_2747_MOESM1_ESM.pdf [file 41467_2017_2747_MOESM1_ESM.pdf]

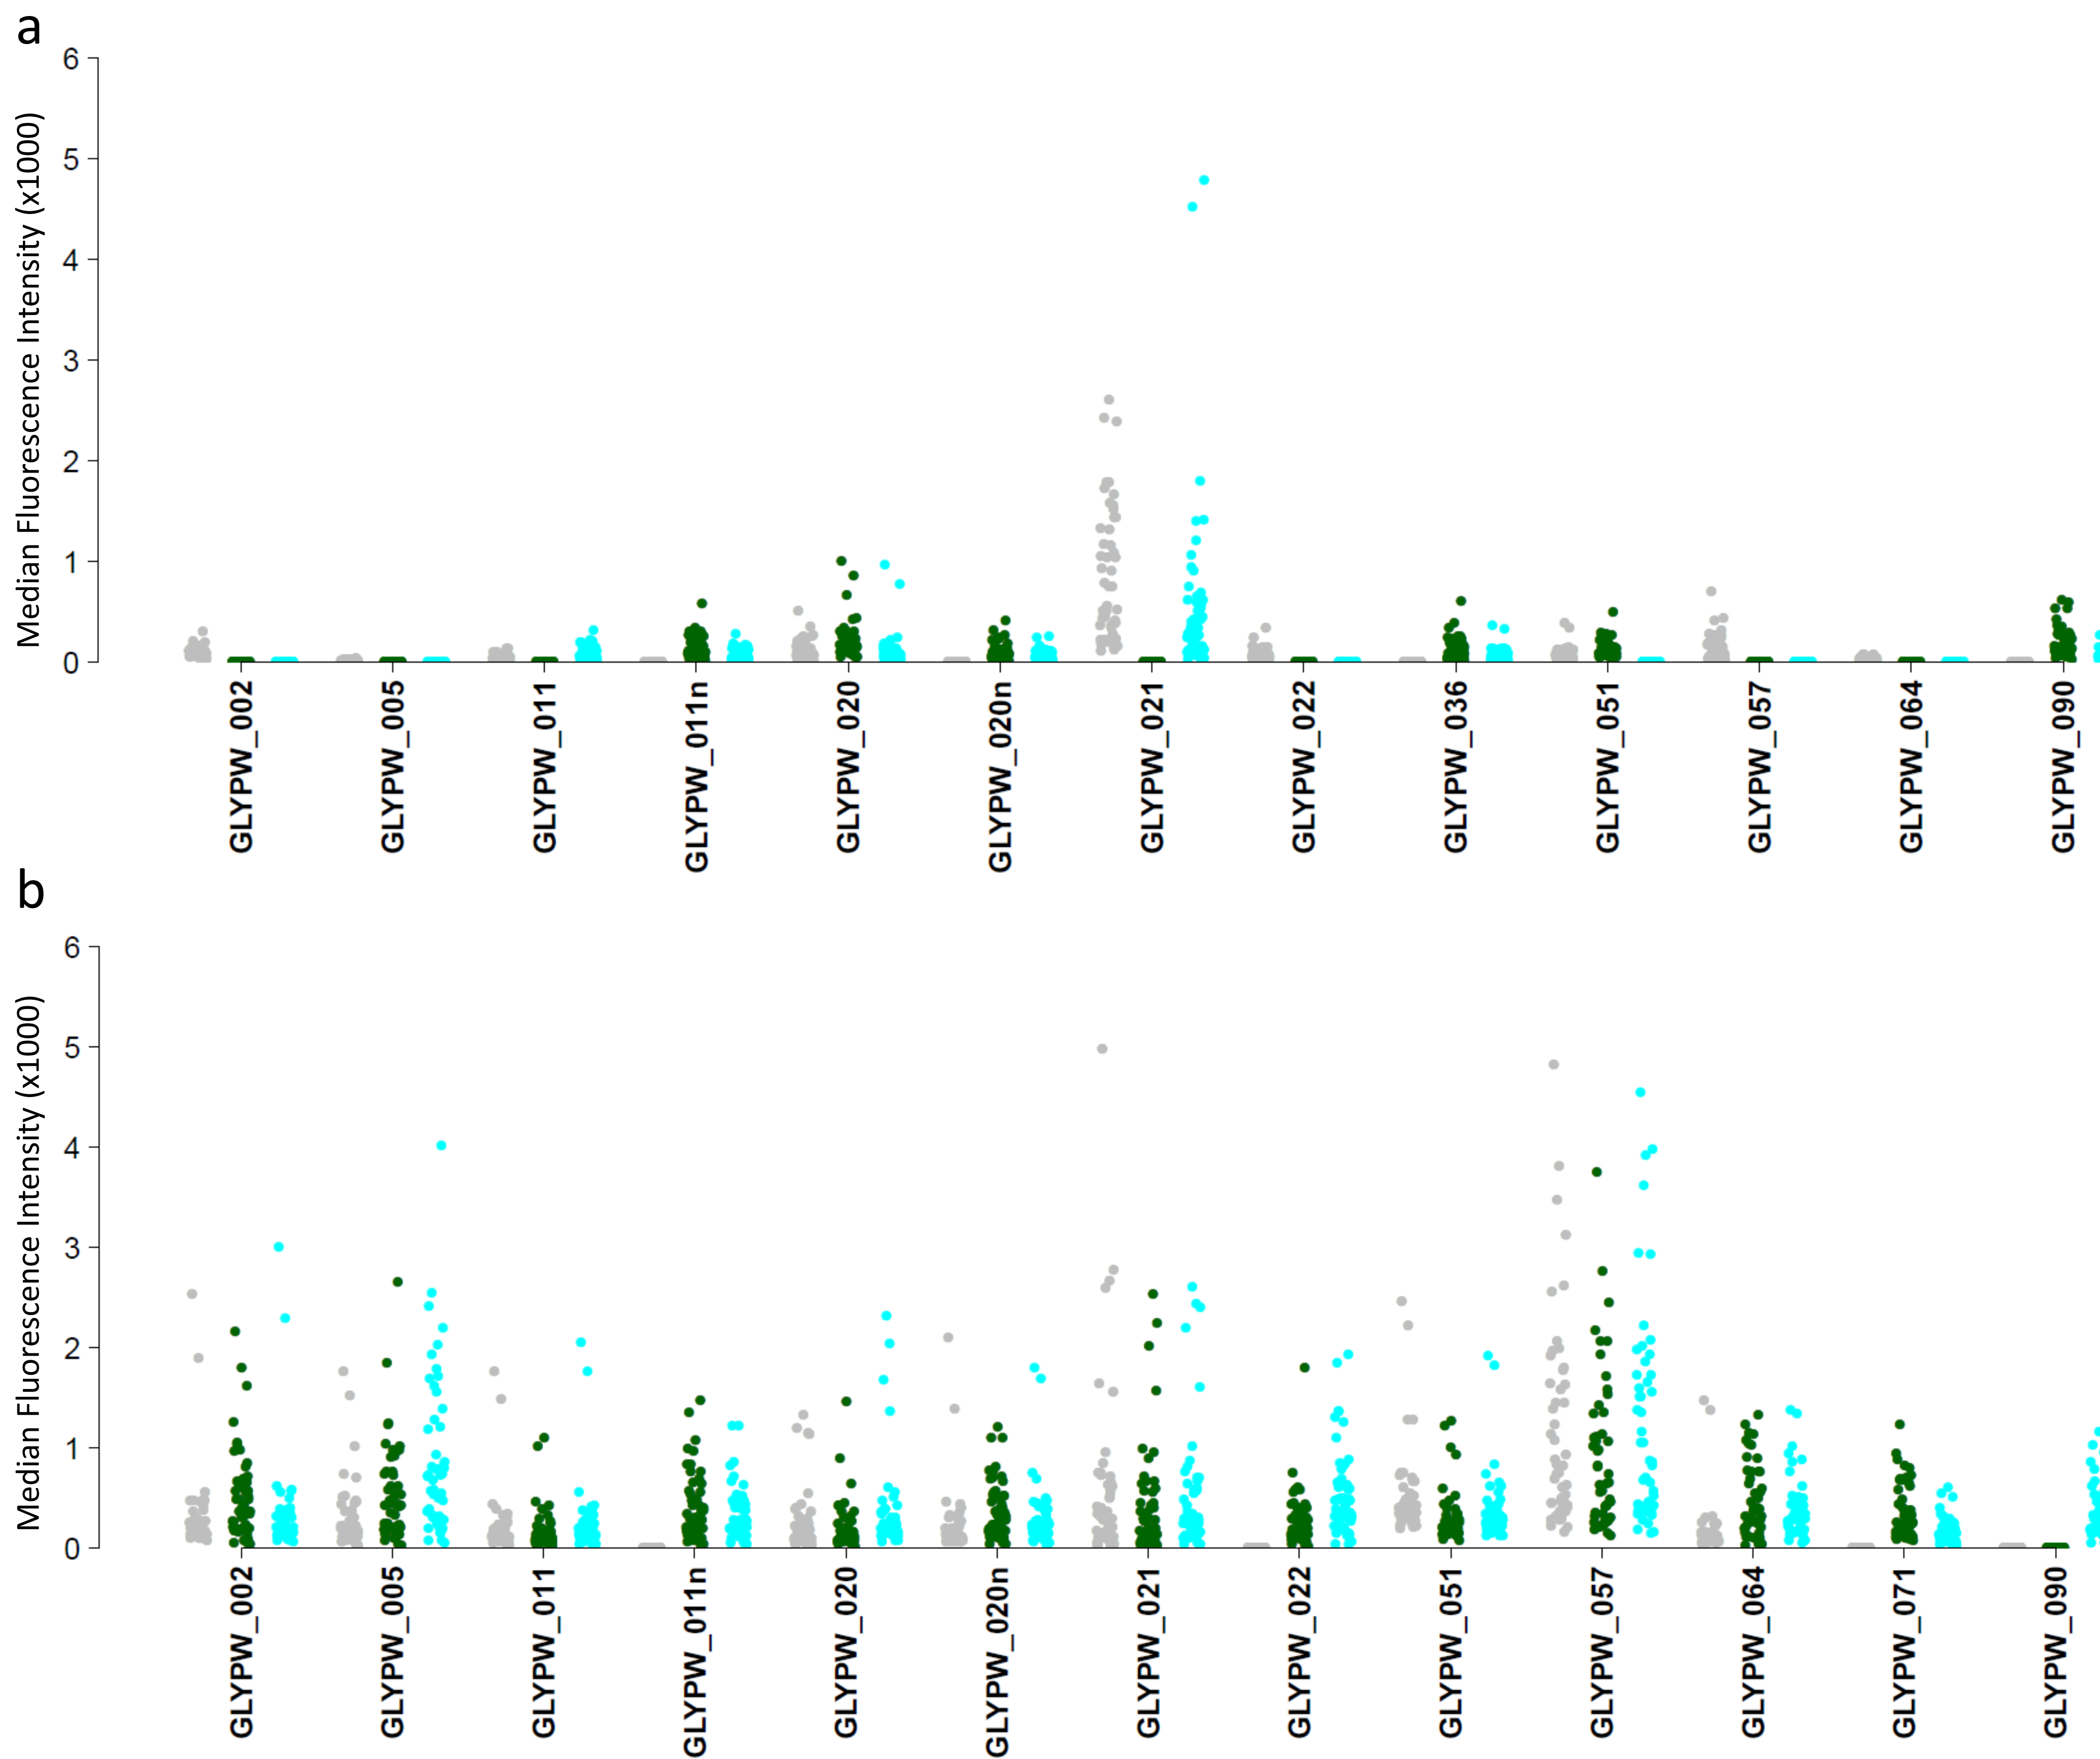

**Supplementary Figure 1:** Comparison of three conjugation methods. a: conjugation of glycans to Luminex beads using DMTMM, b: conjugation of glycans to beads using single-step EDC conjugation and c: two step conjugation by activating the beads with Sulfo-NHS and EDC prior to addition of glycans. All conjugations were repeated on three different days to assess the reproducibility of the conjugation strategies. We measured anti-glycan IgM in serum samples (n=48) to compare the conjugation strategies. Conjugations were performed on three different days day1 (grey), day 2 (dark green) and day 5 (cyan).

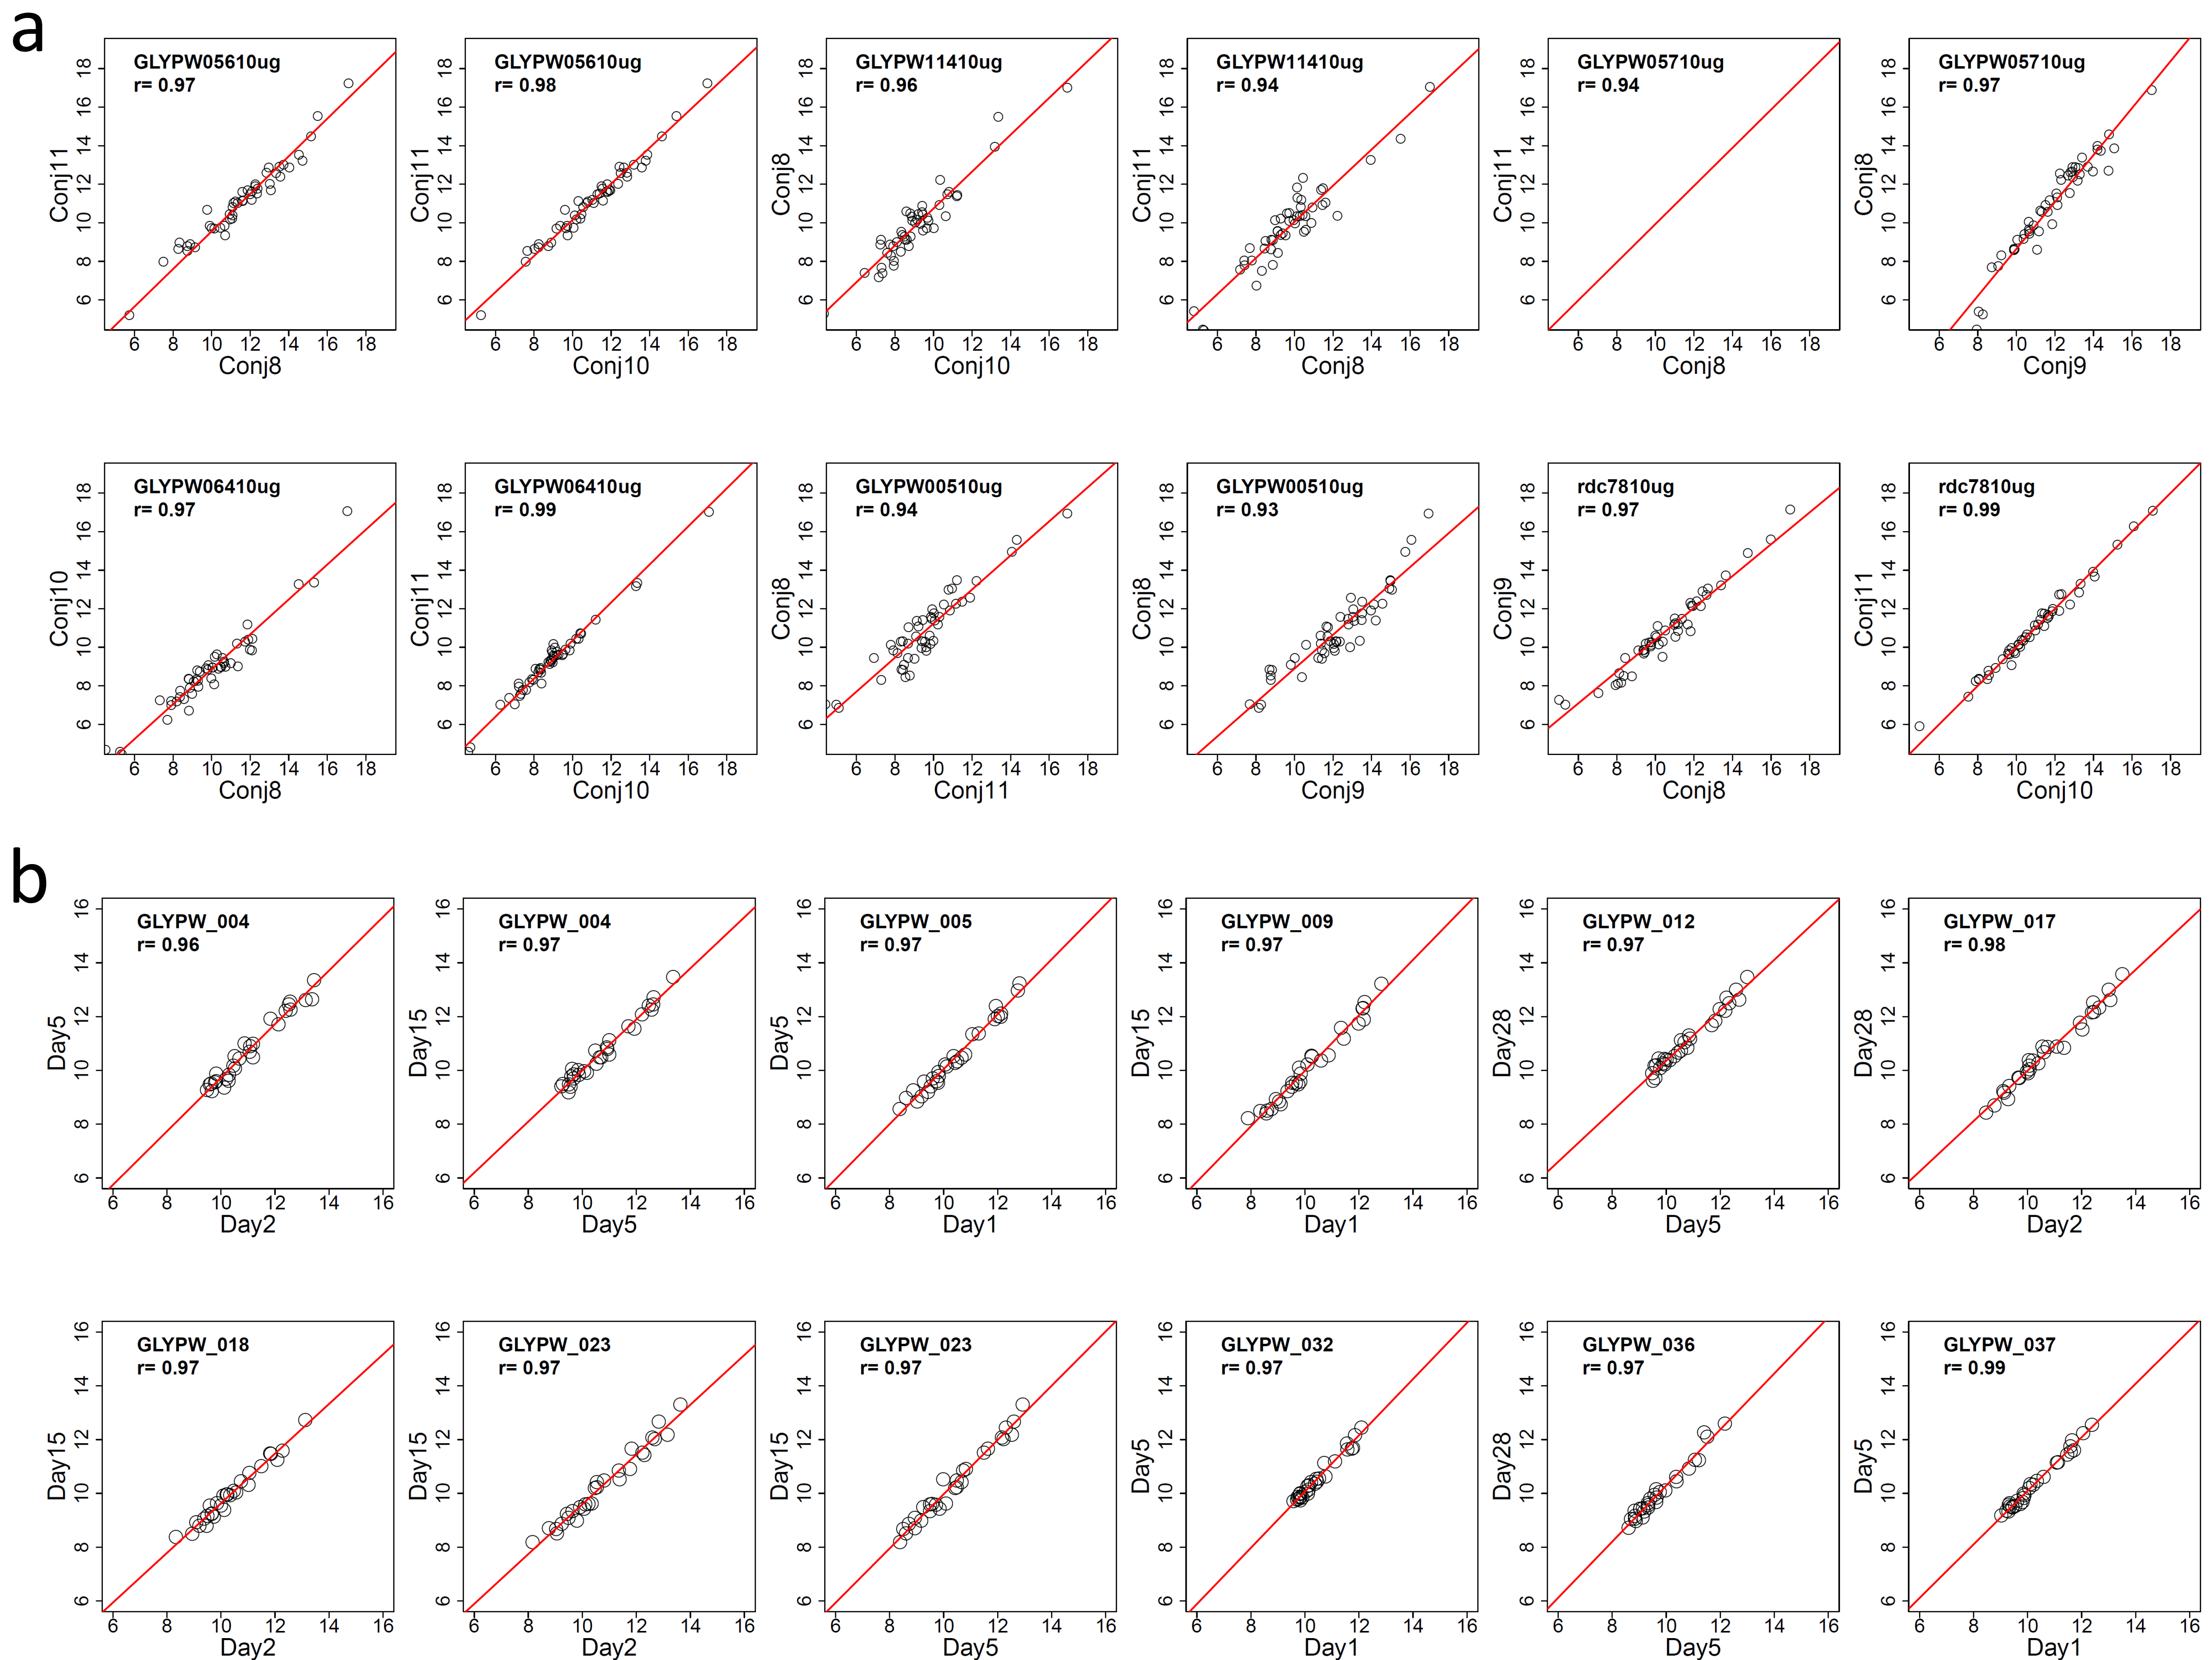

**Supplementary Figure 2: Reproducibility of conjugation and profiling process for the MGBA. a)** Reproducibility of the conjugation process. Selected glycans were conjugated to beads using EDC conjugation on Days 1, 2, 5, 15, 20. Reproducibility was assessed by measuring anti-glycan IgM in serum samples of 48 individuals in the same plate. Log<sub>2</sub> transformed median fluorescence intensities (MFI) were compared using linear regression and correlation coefficient (R) was calculated. **b)** Reproducibility for the assay at different assay times. The same batch of bead conjugation was used to measure anti-glycan IgM in 48 serum samples on five different days (1, 2, 5, 10 and 28). Linear regression and coefficient of correlation (R) between the log<sub>2</sub> transformed MFI values for different days were used to measure reproducibility.

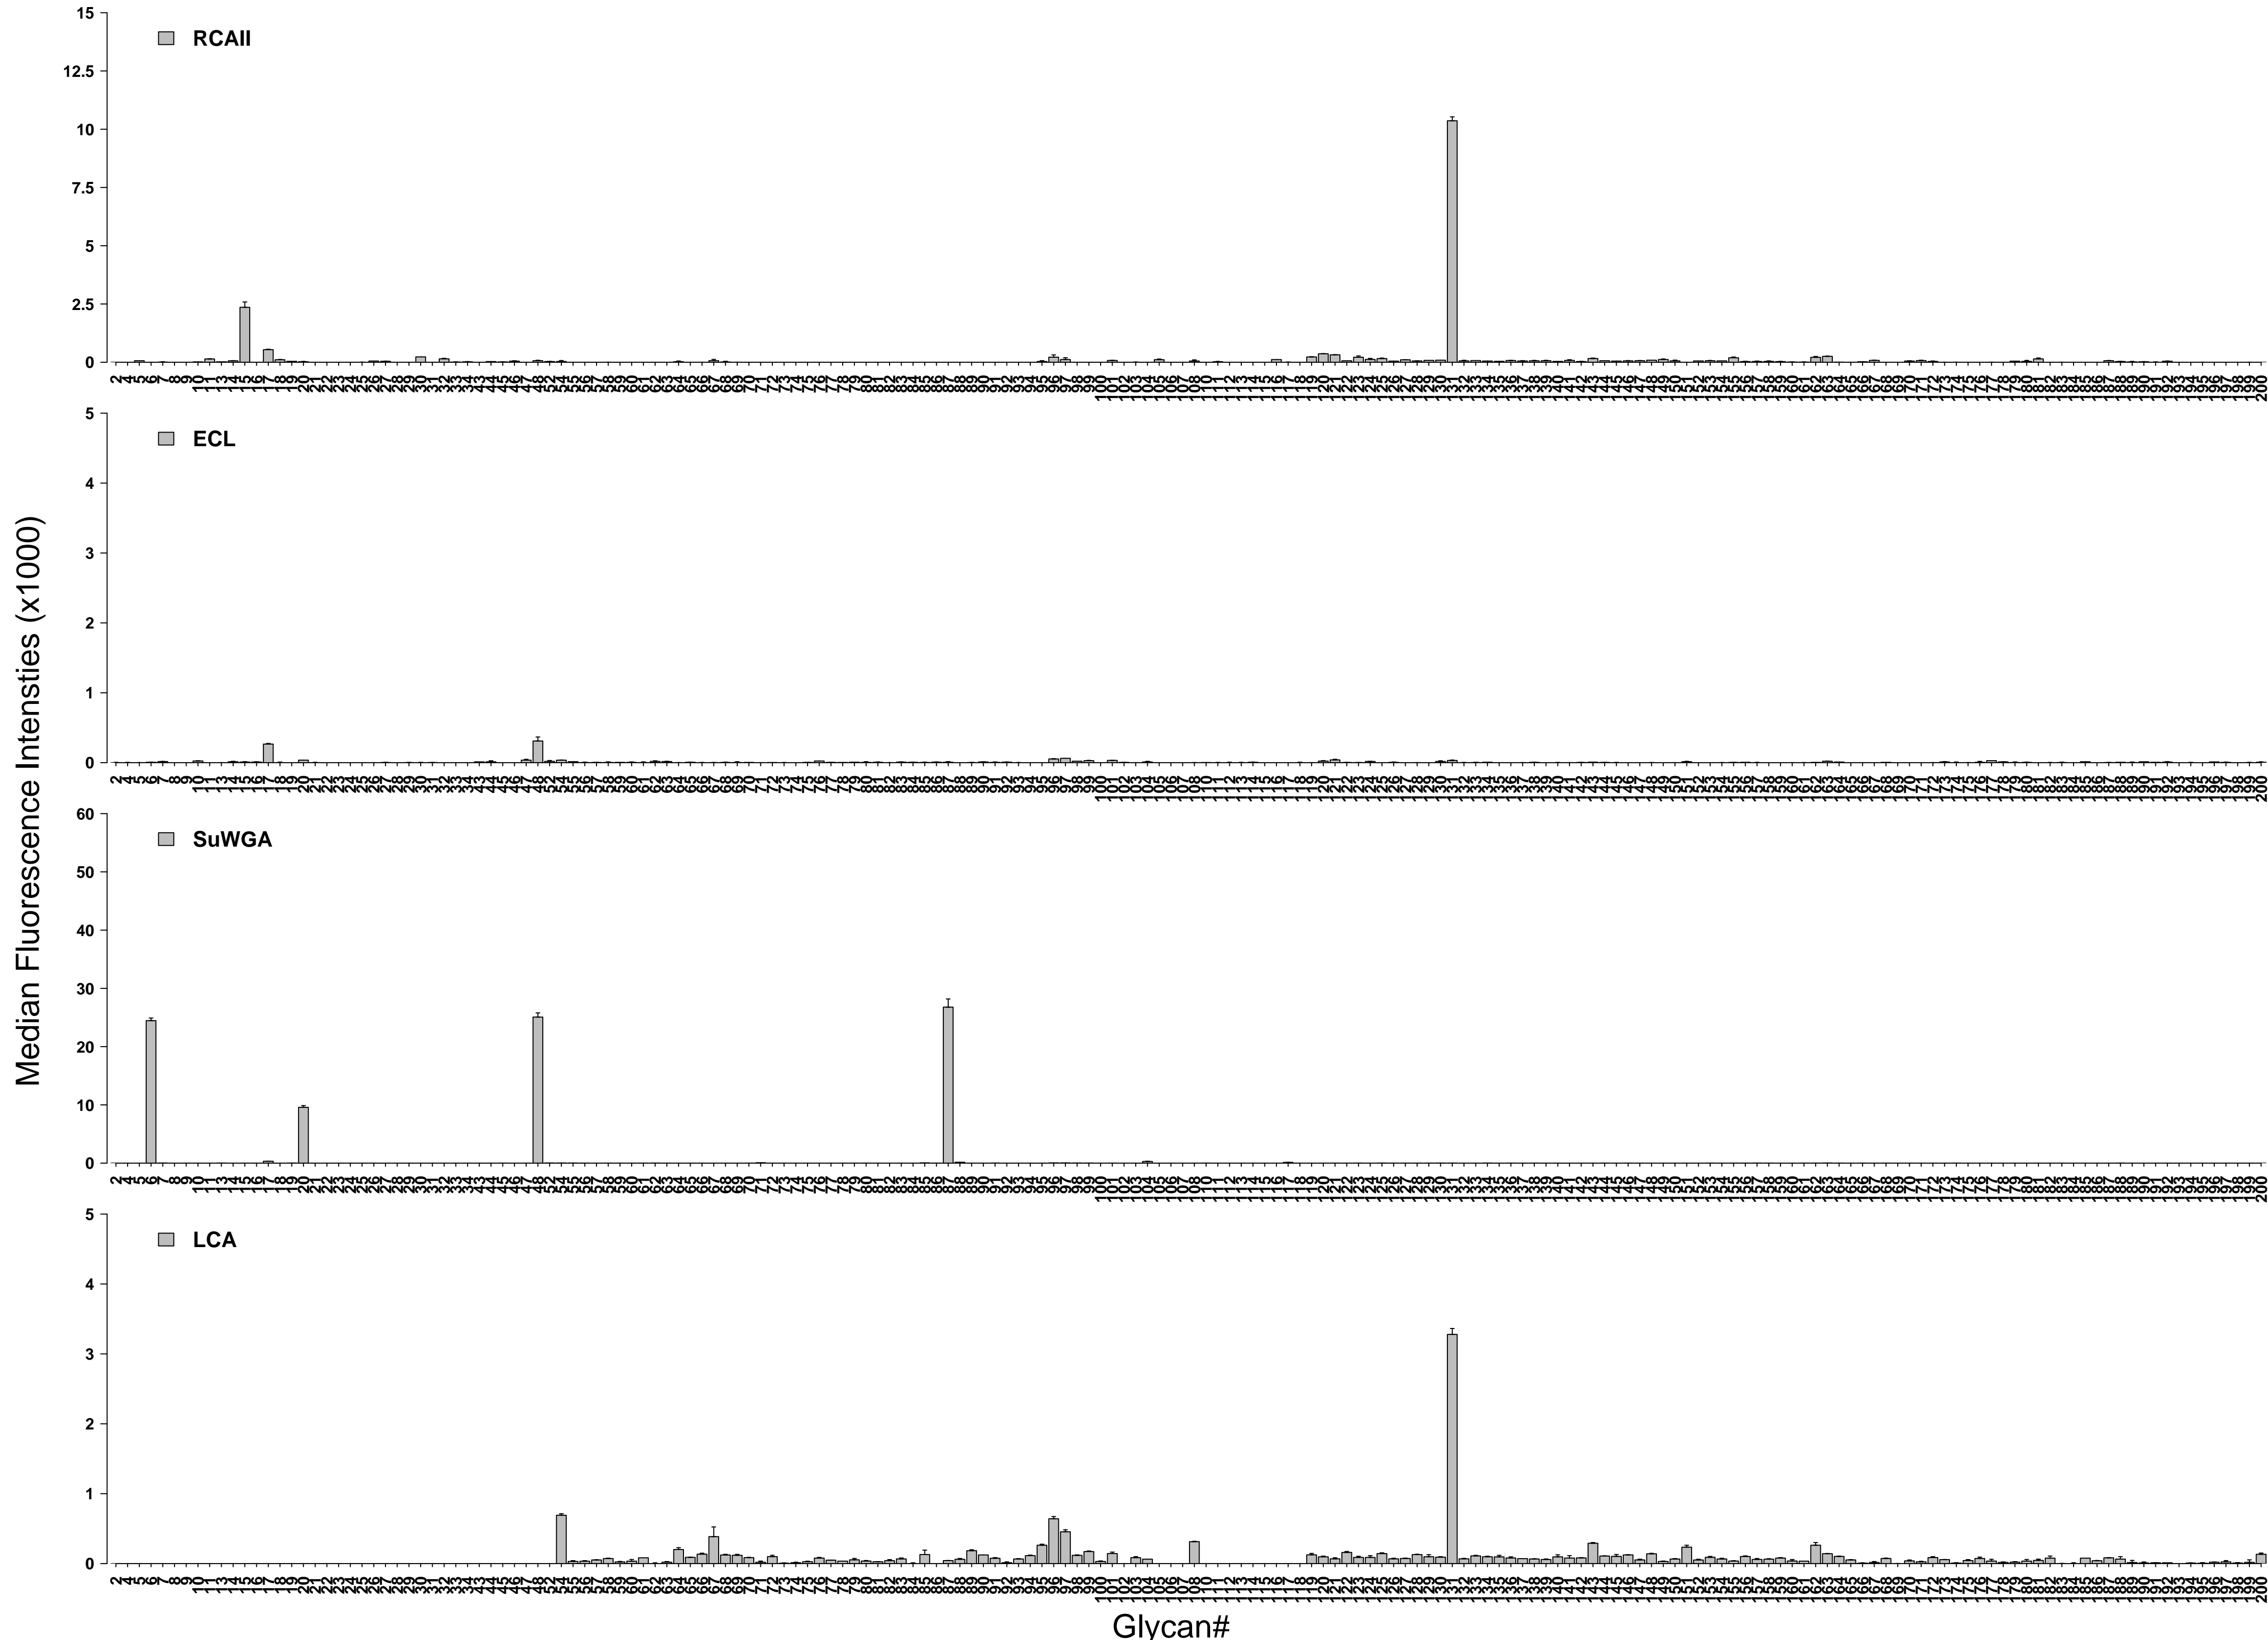

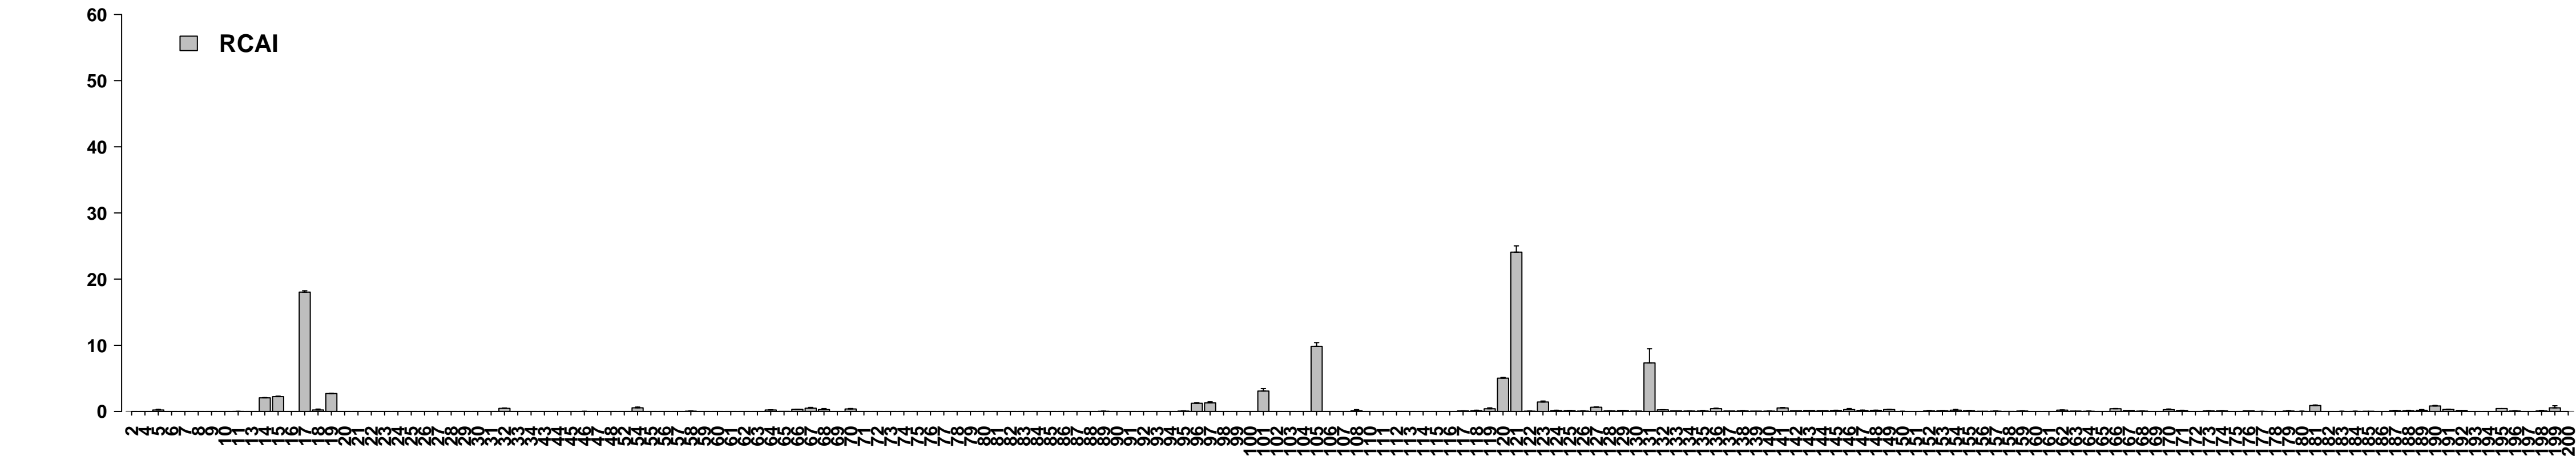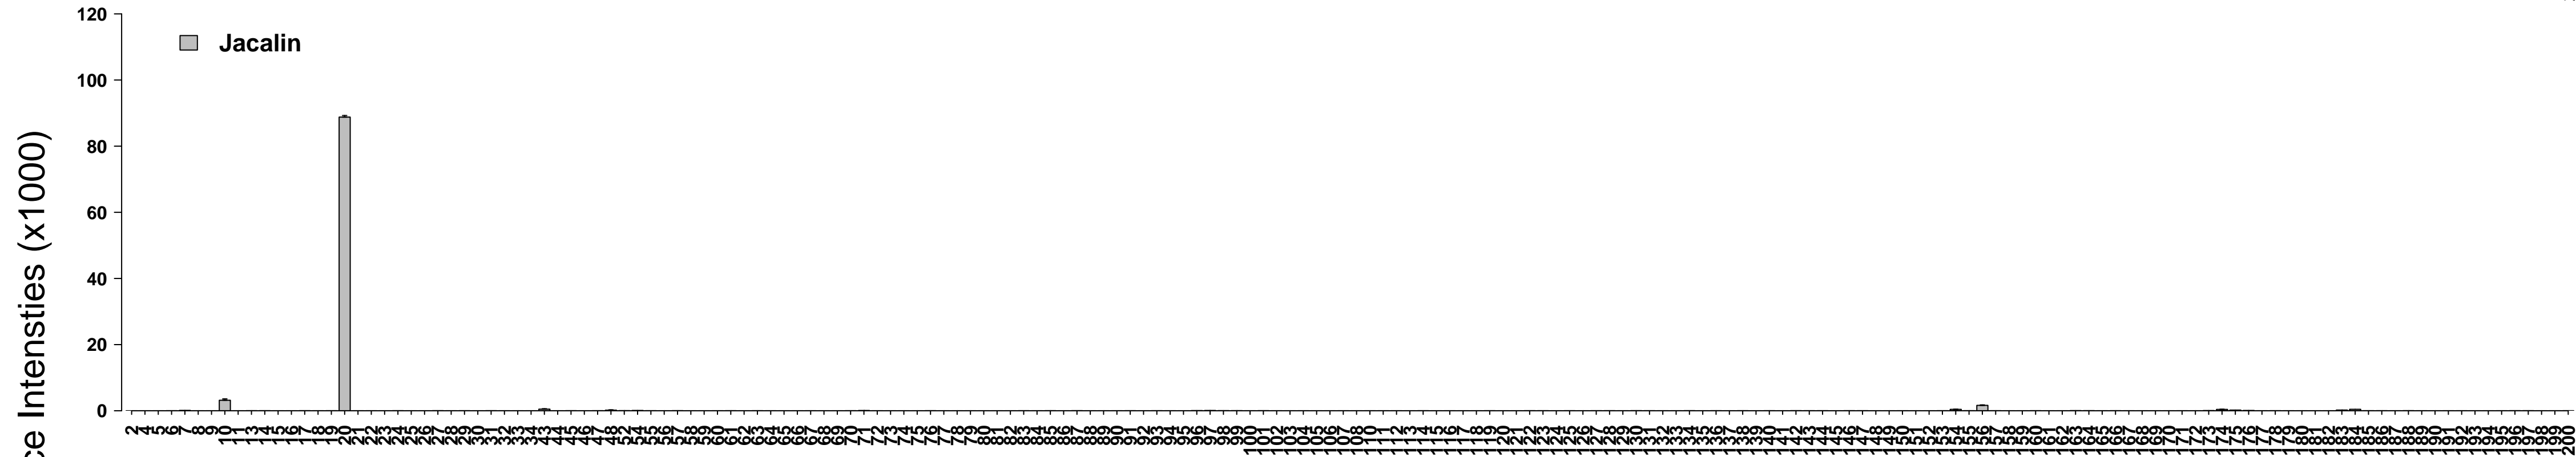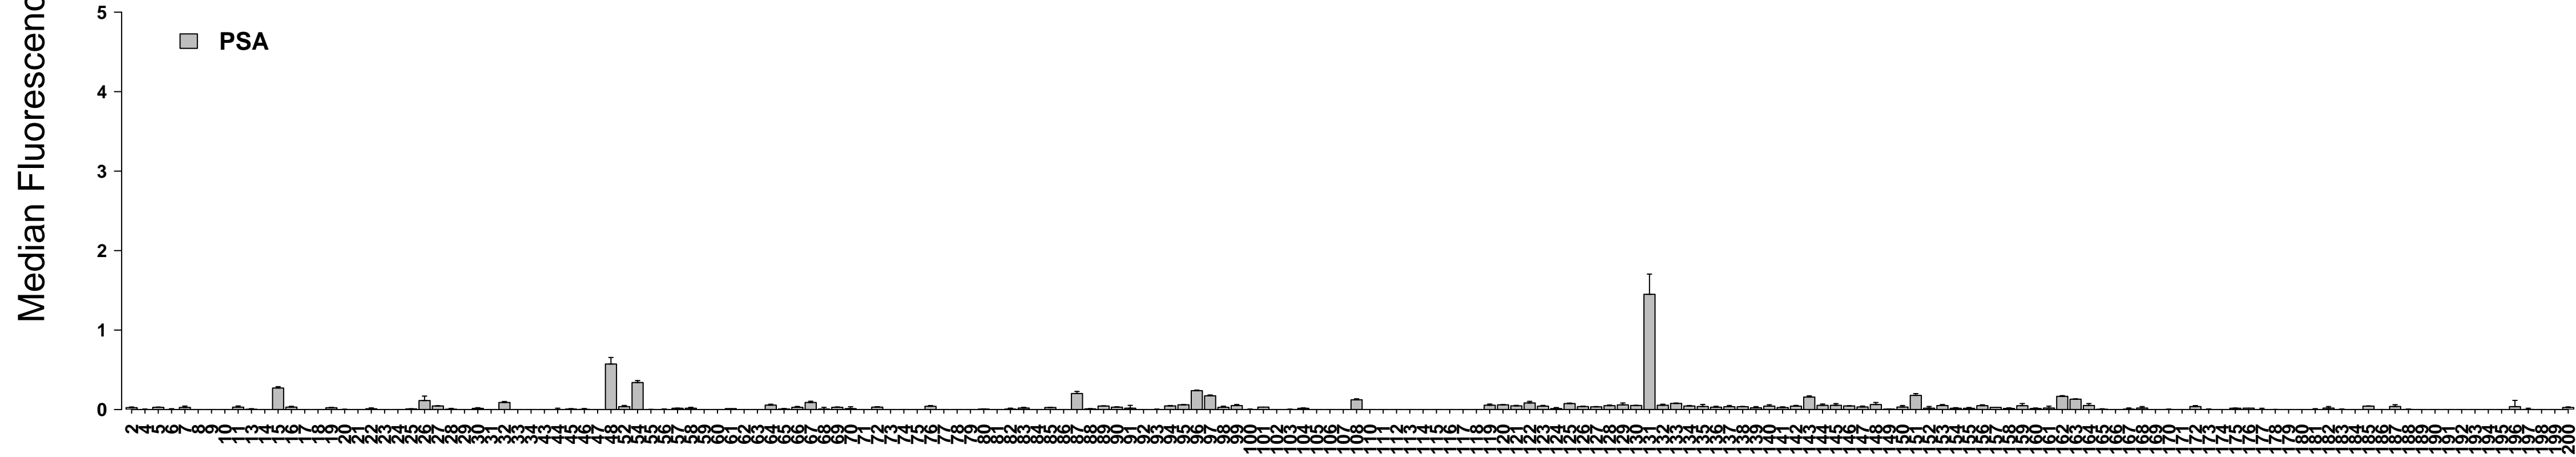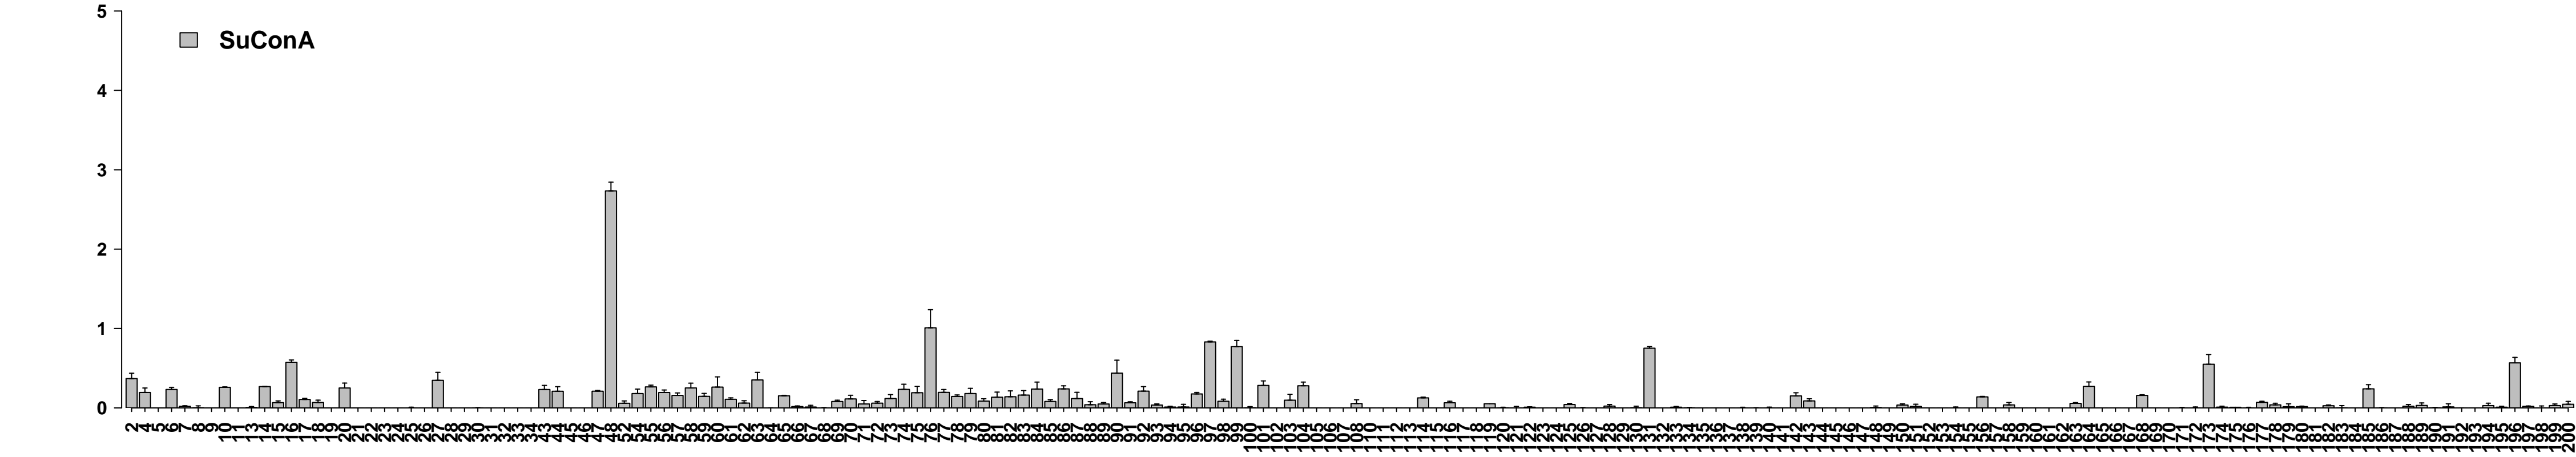

Glycan#



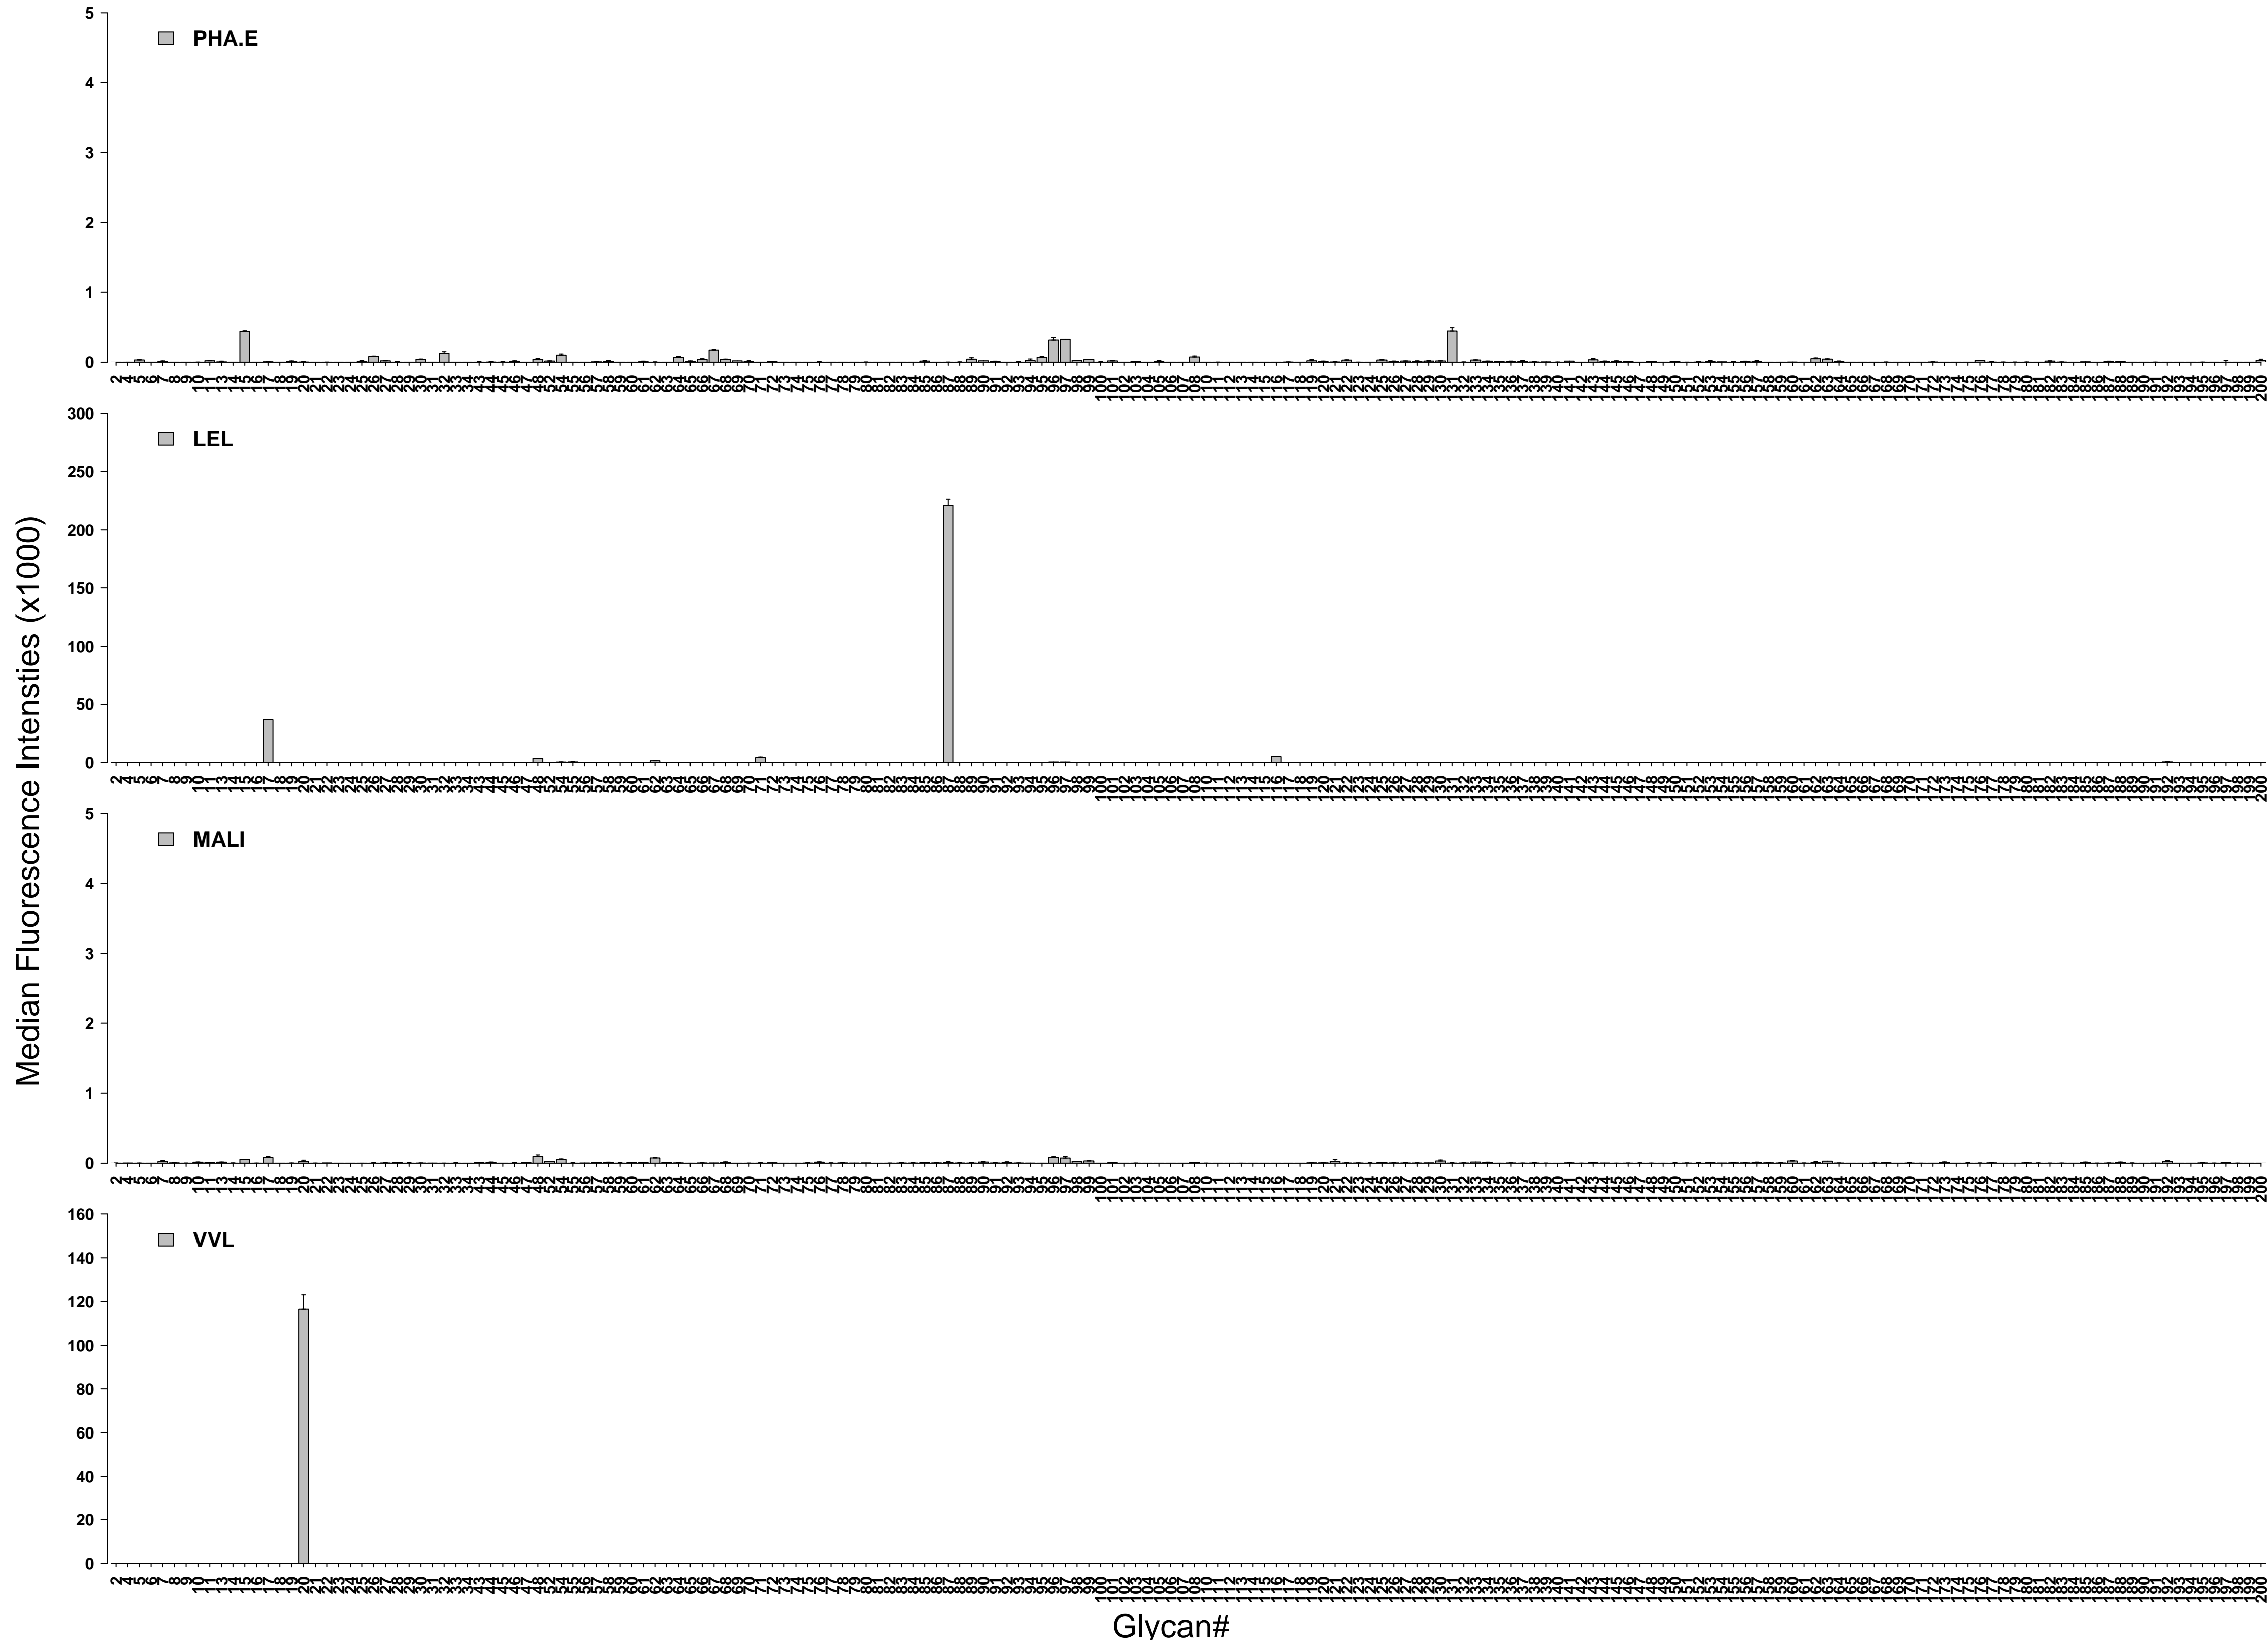

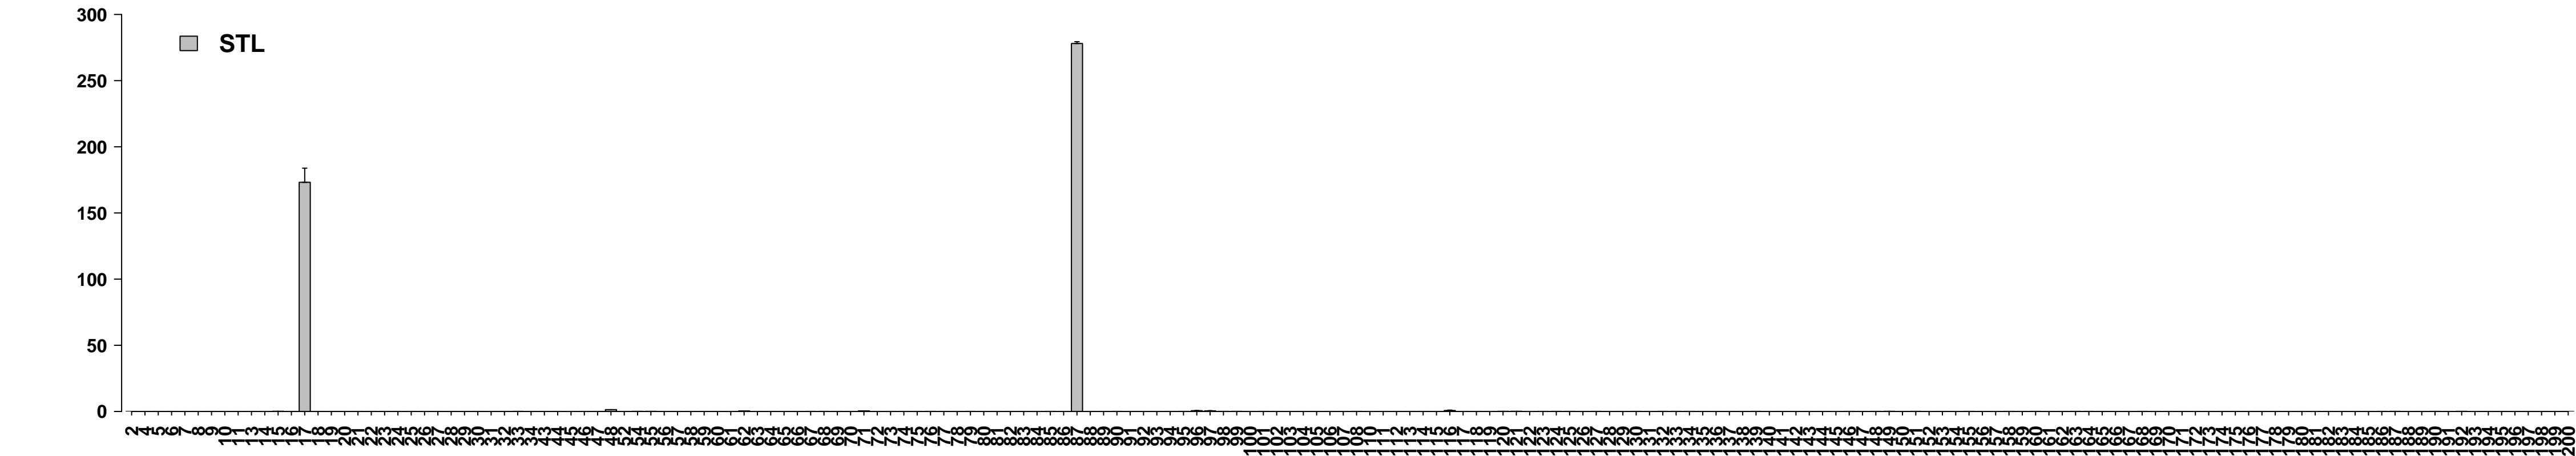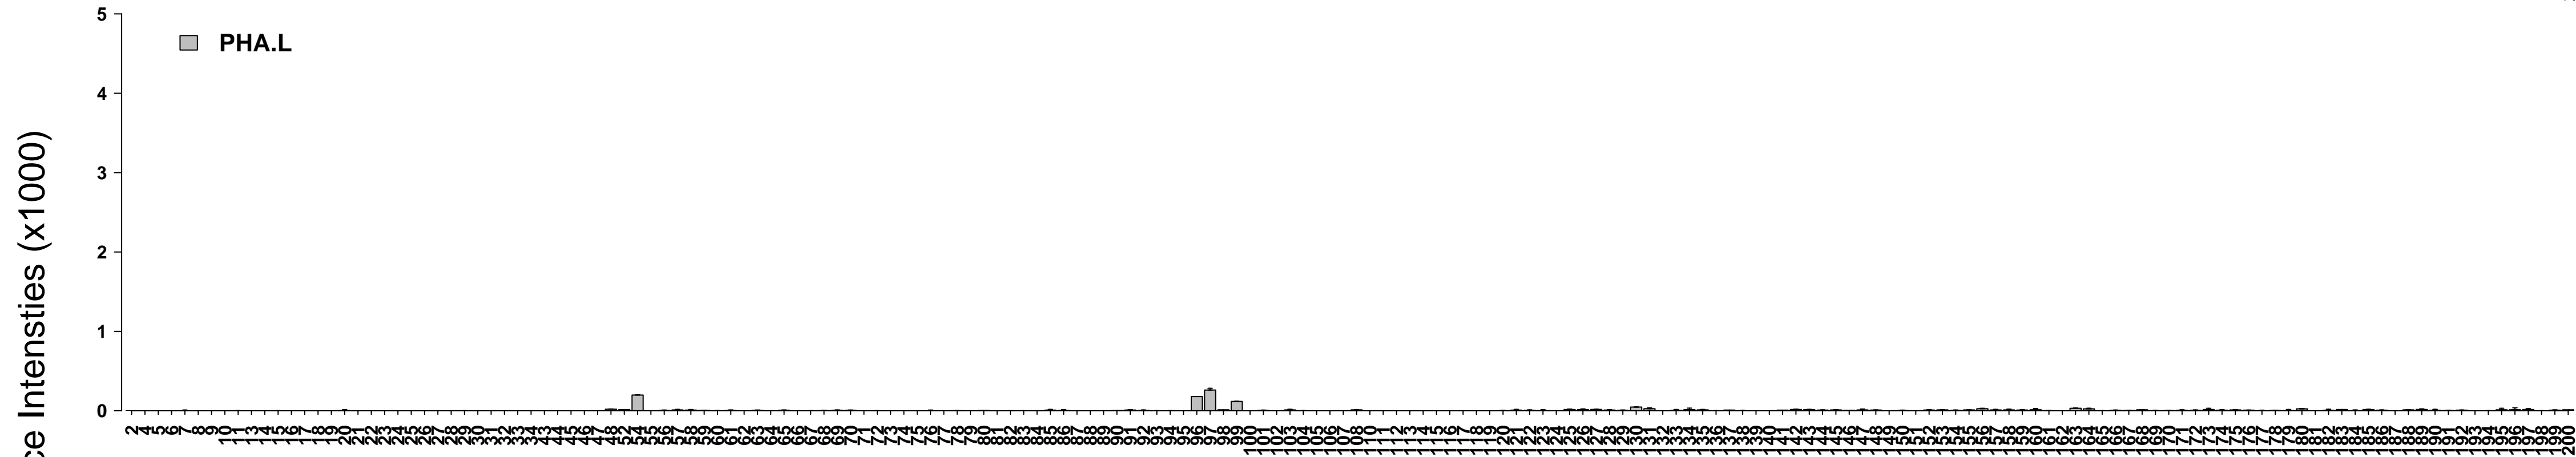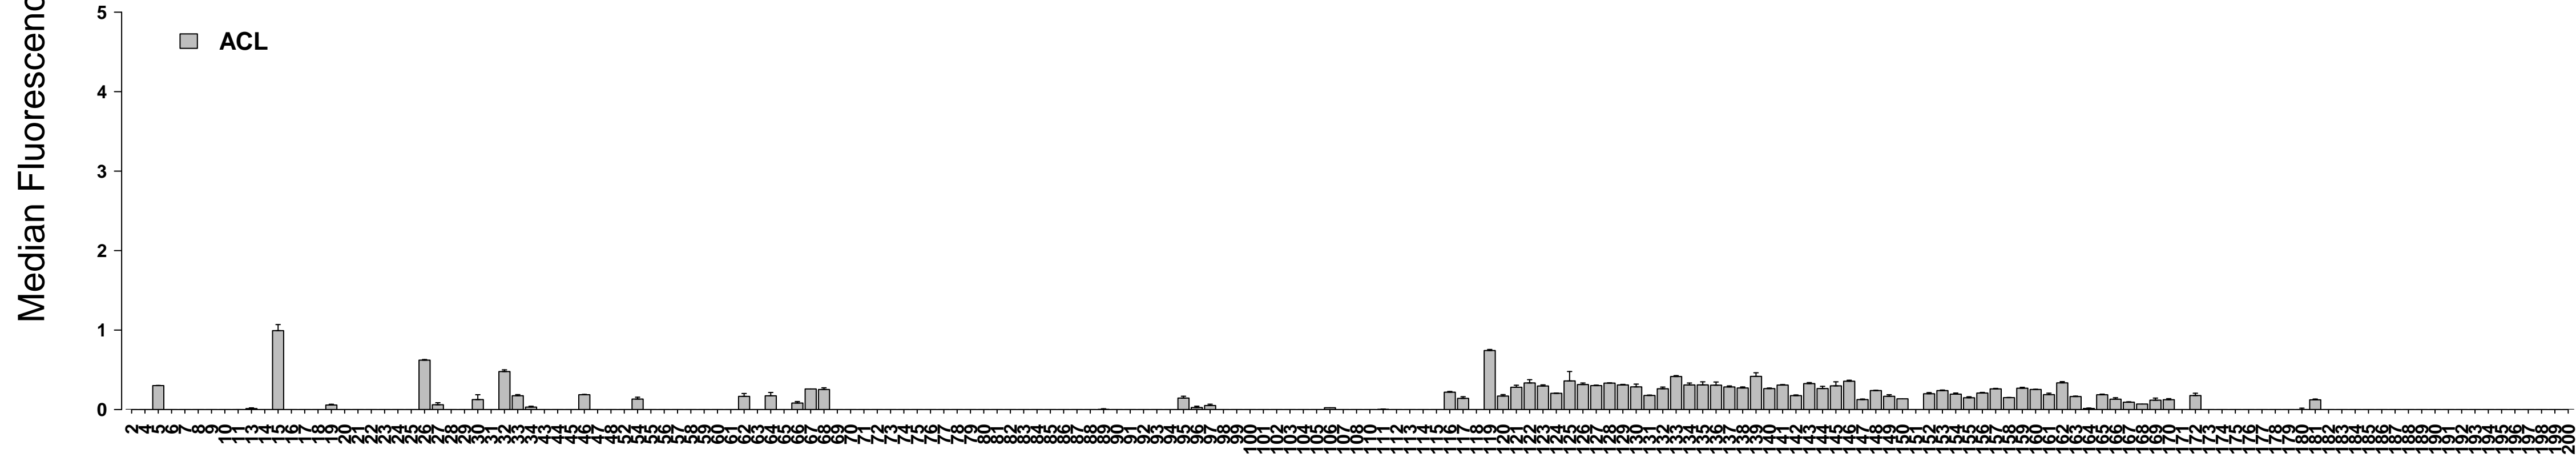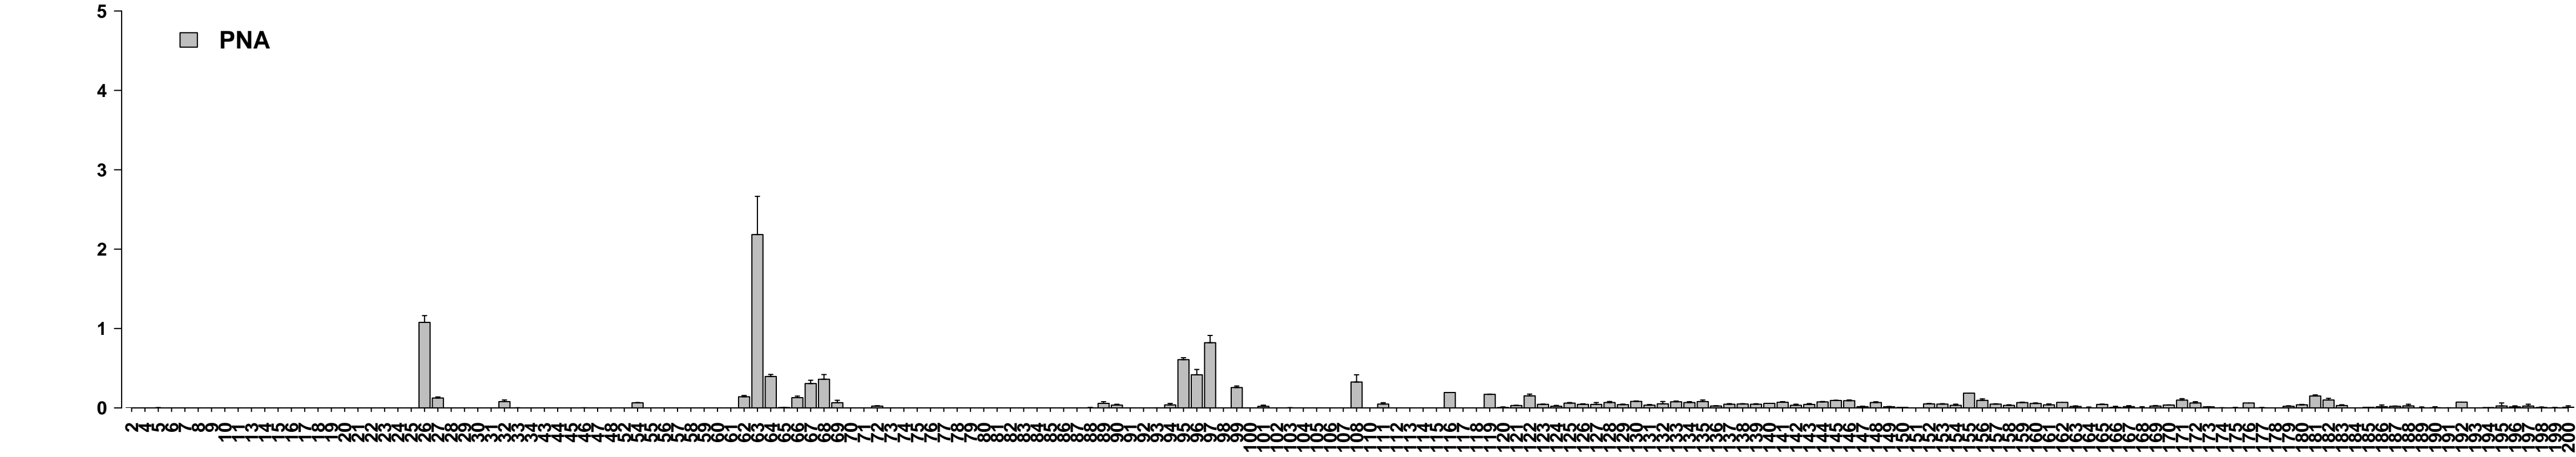

Glycan#

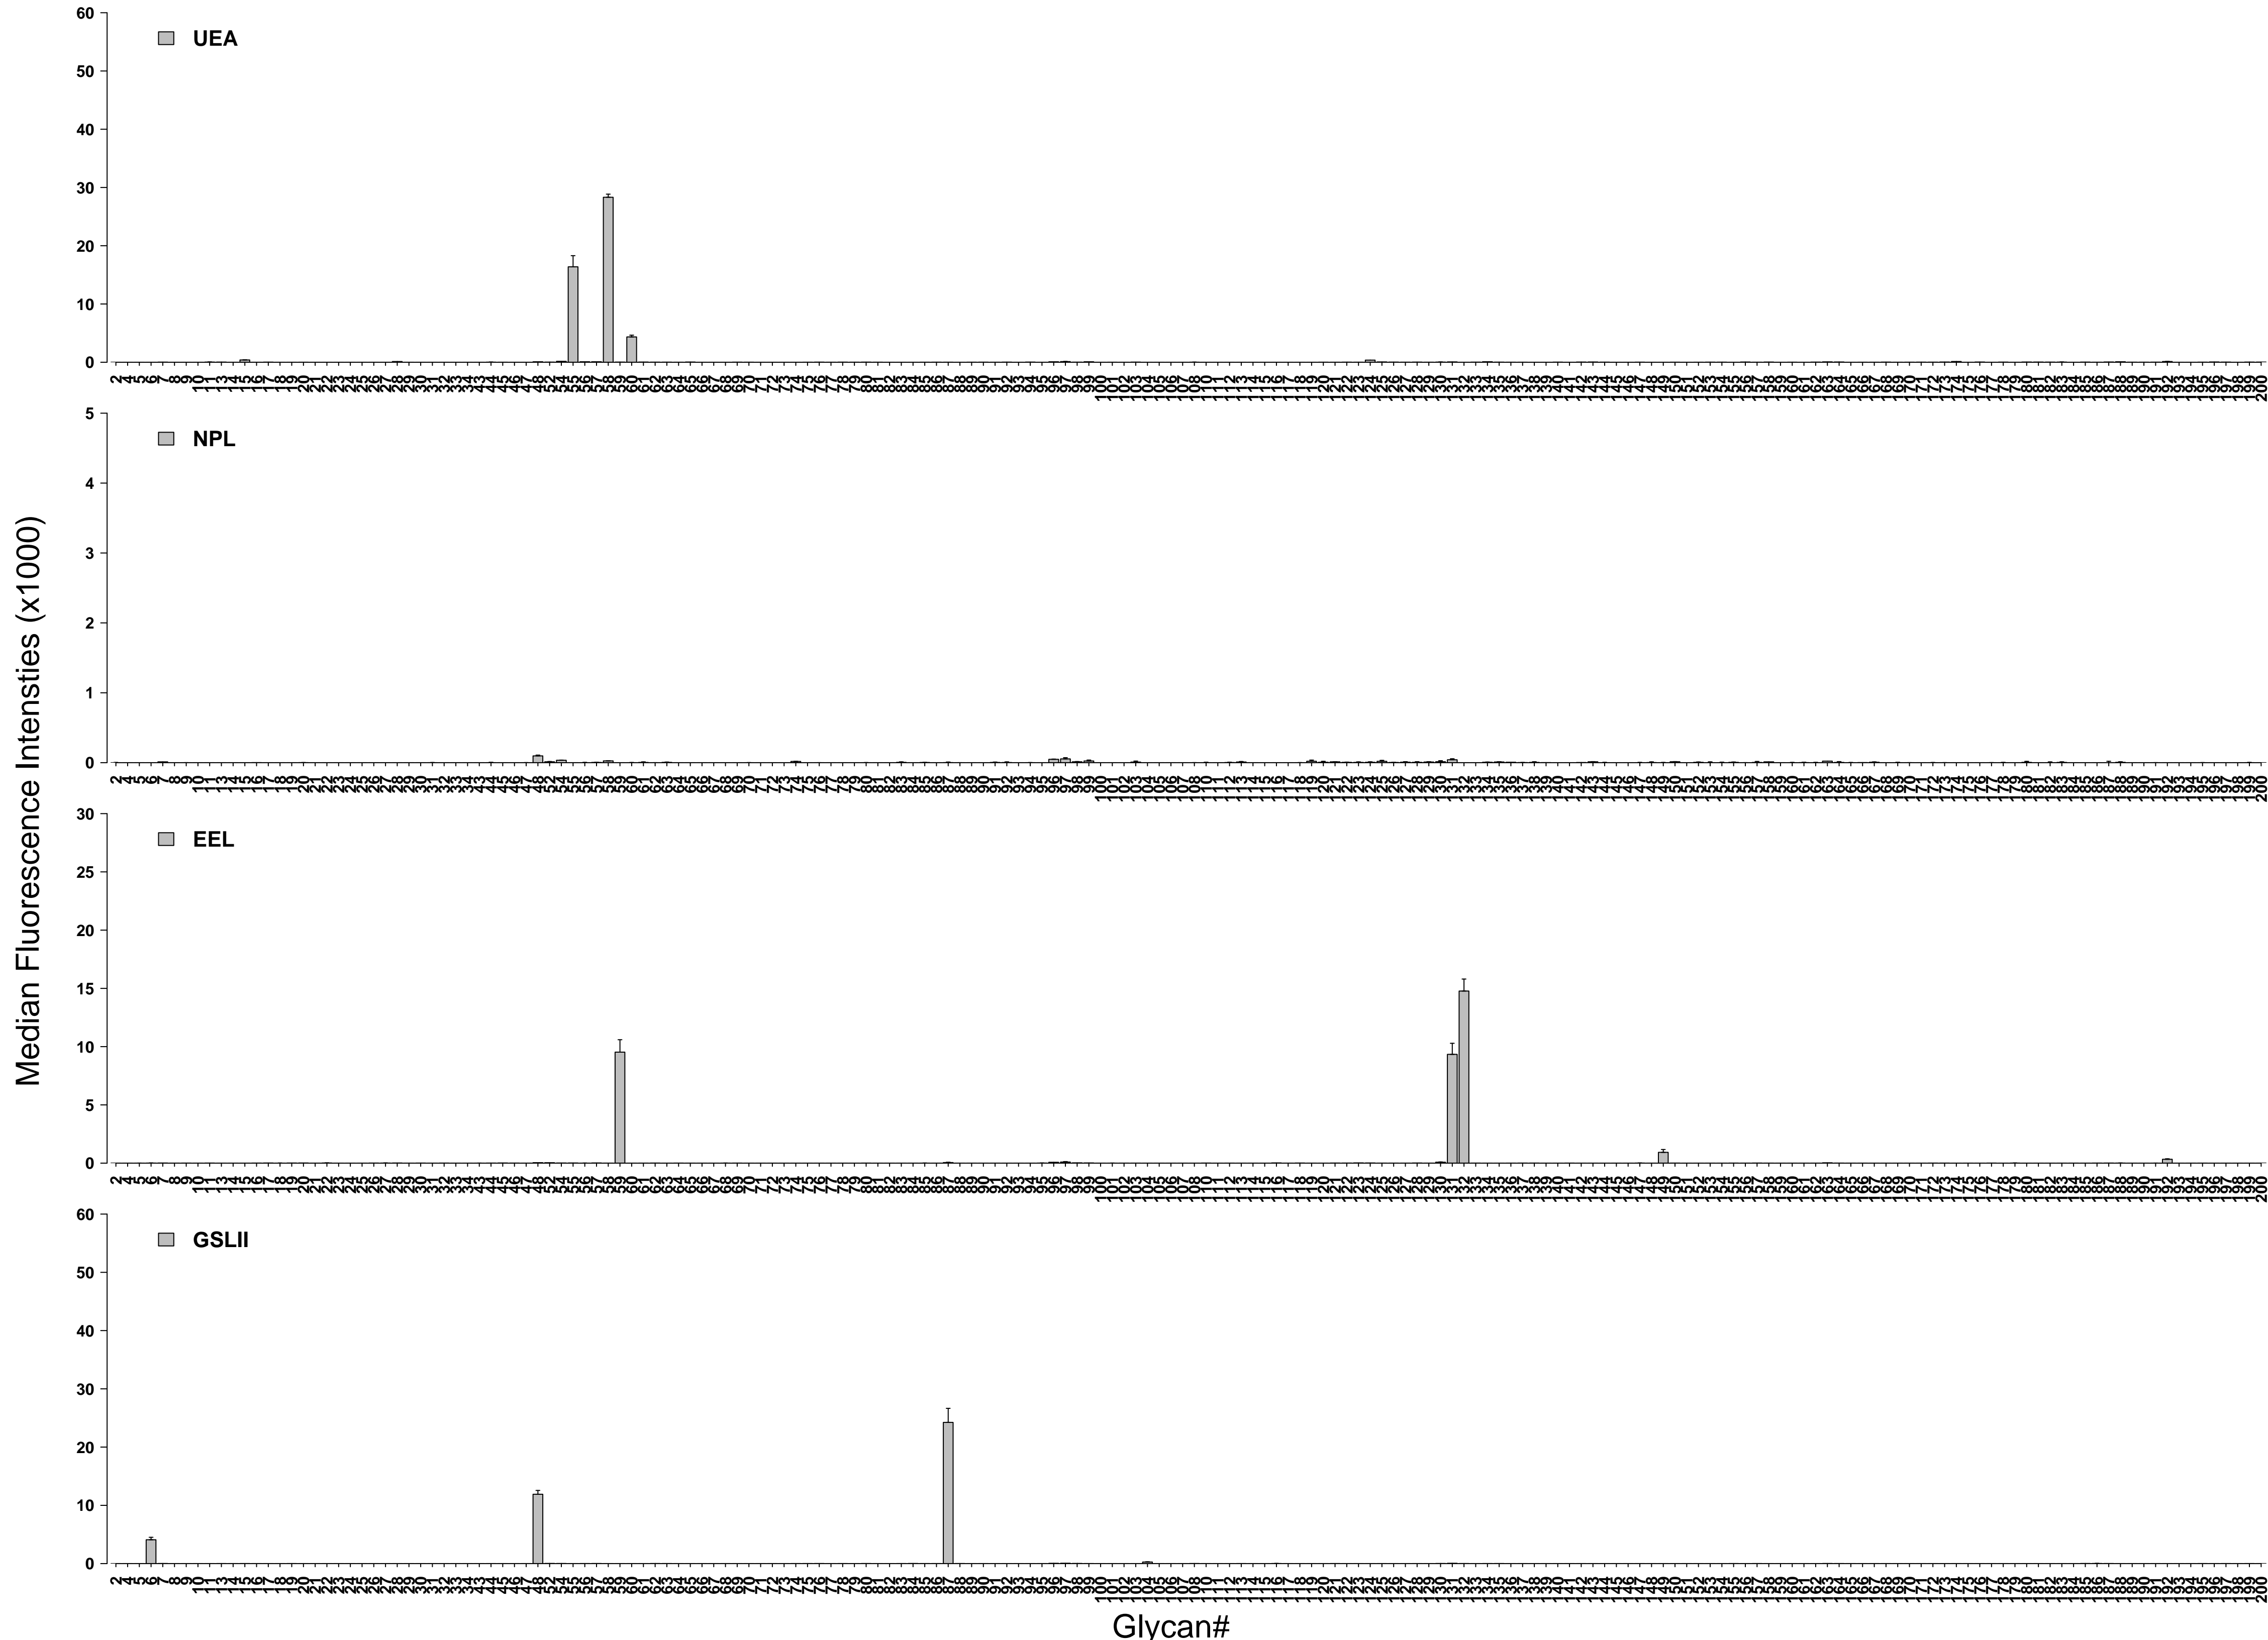



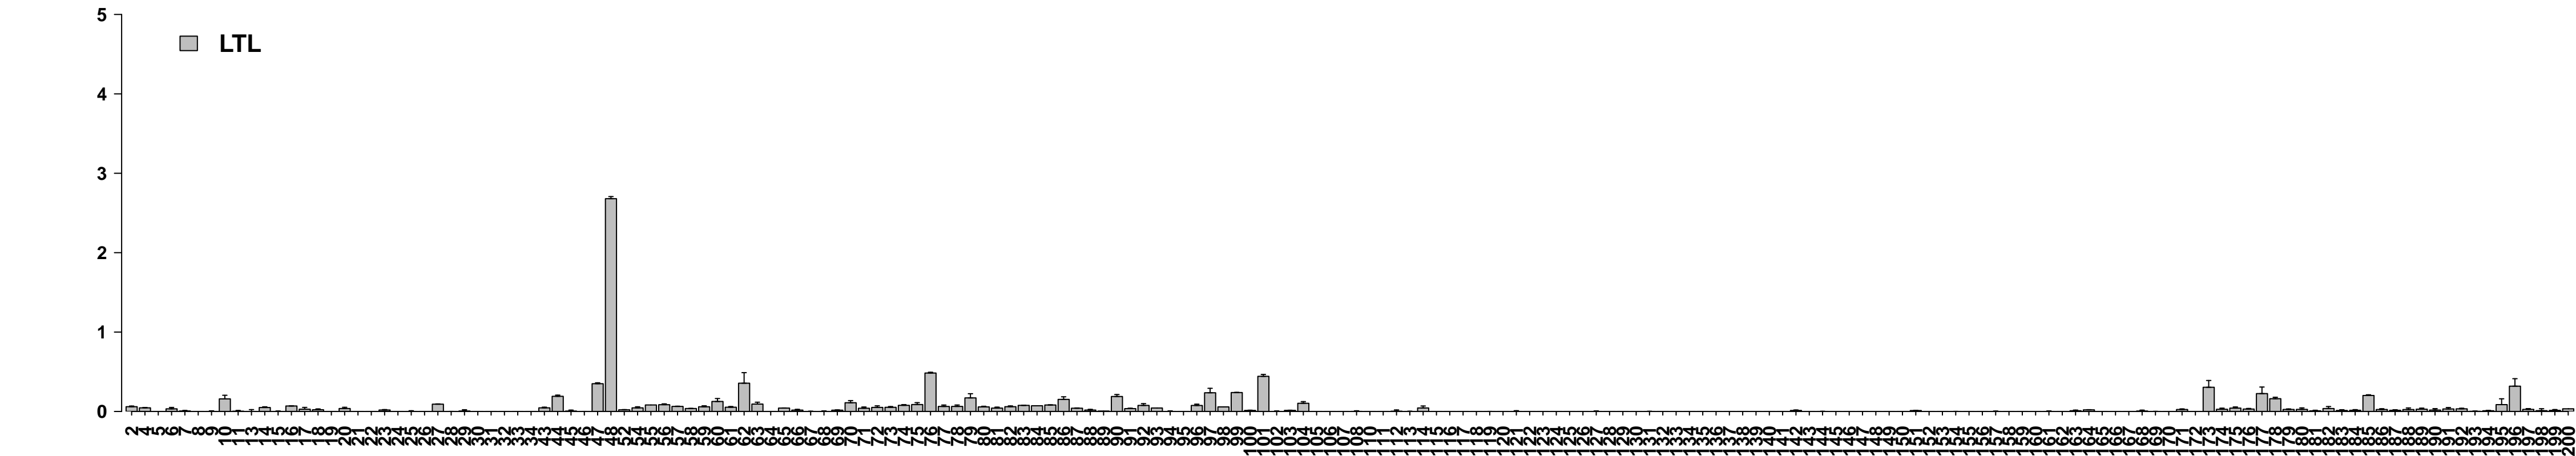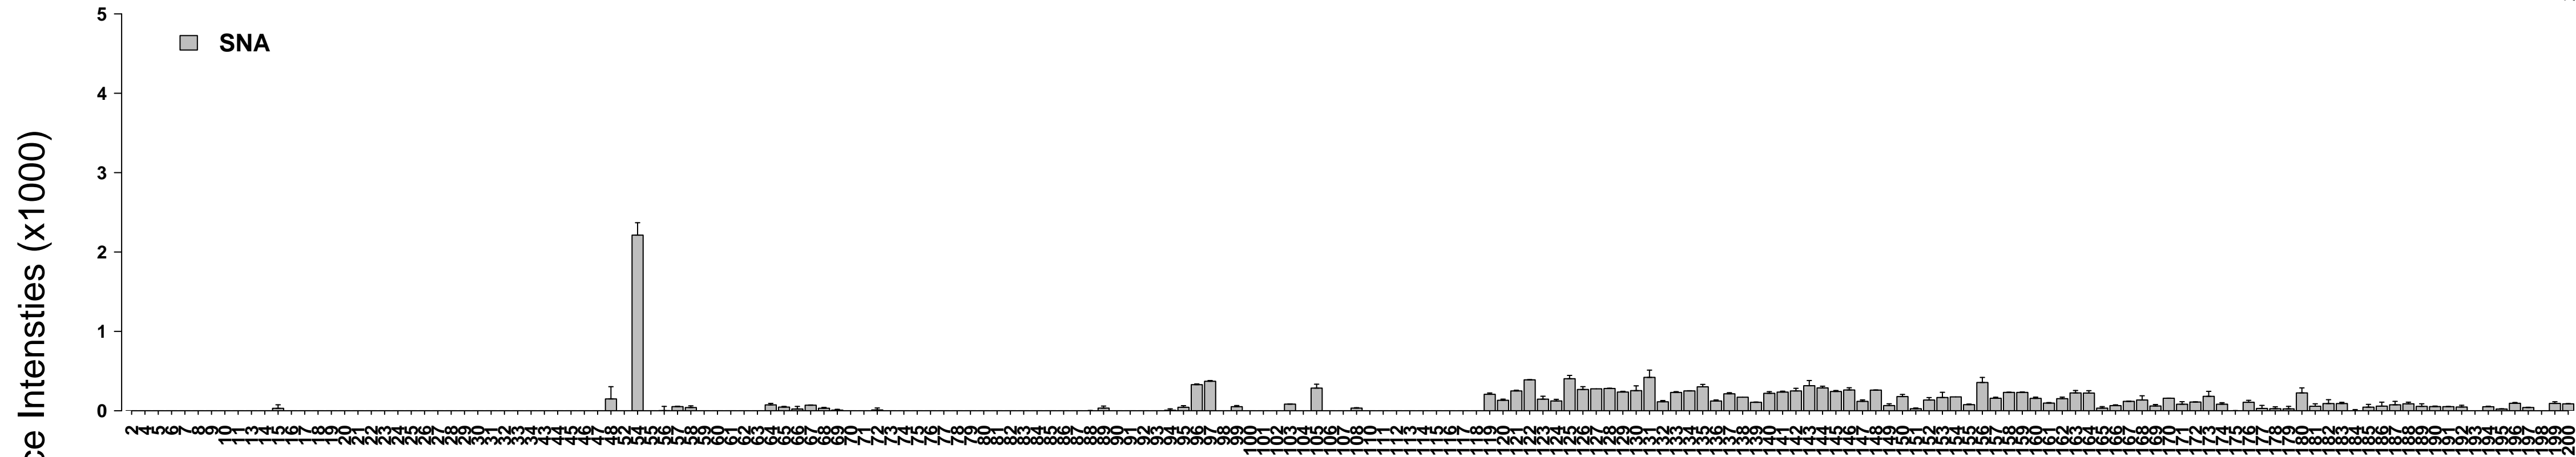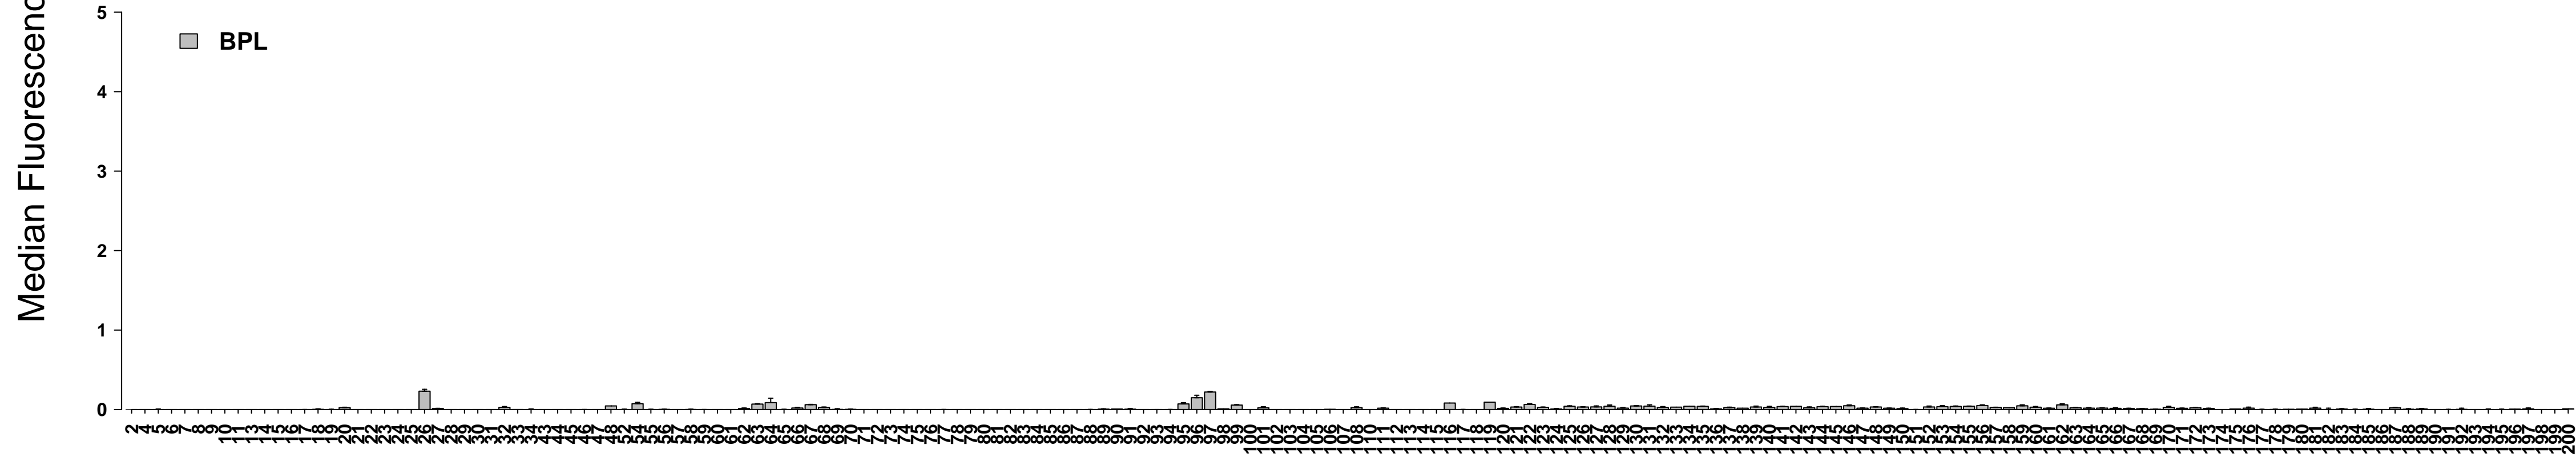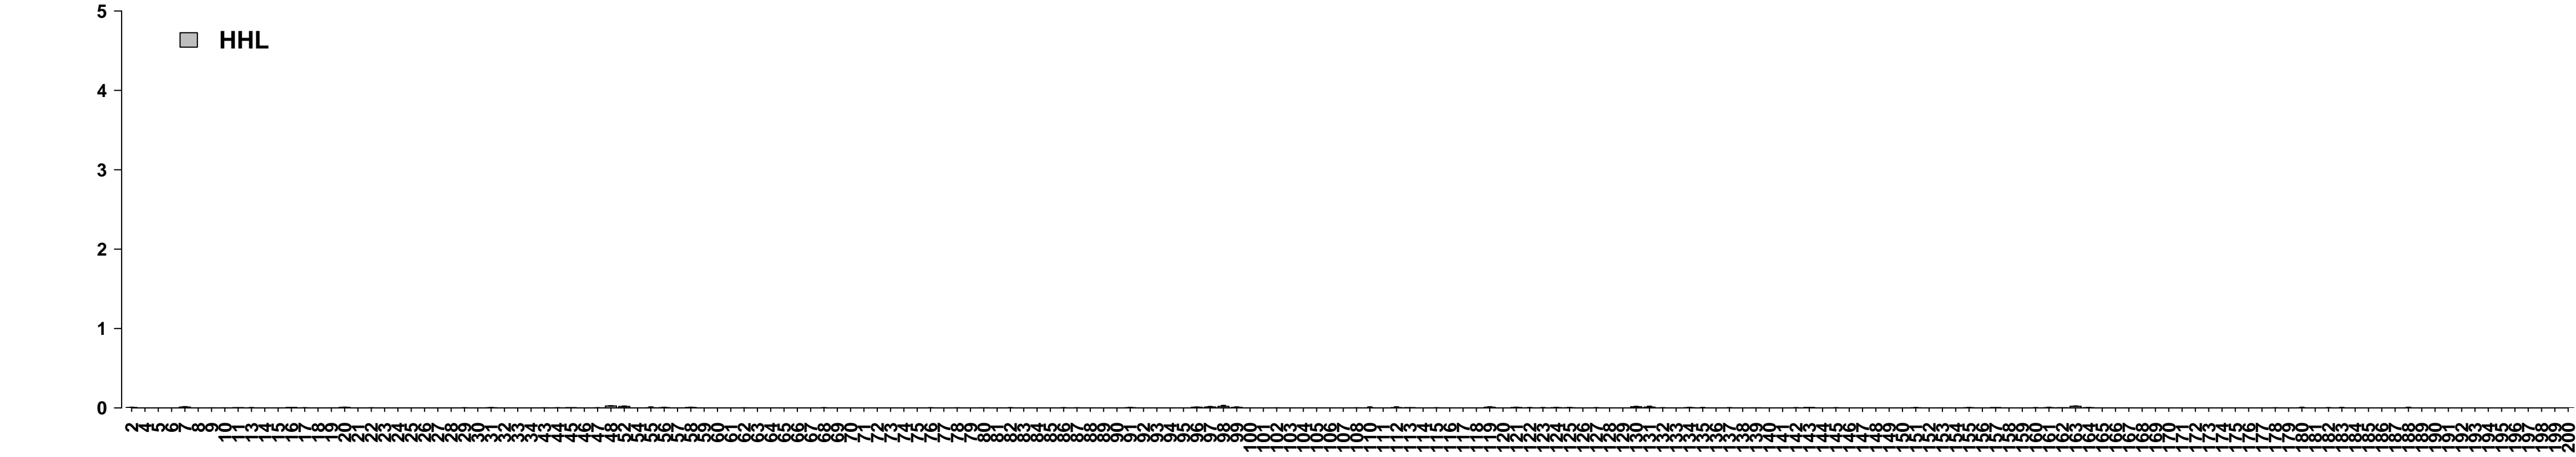

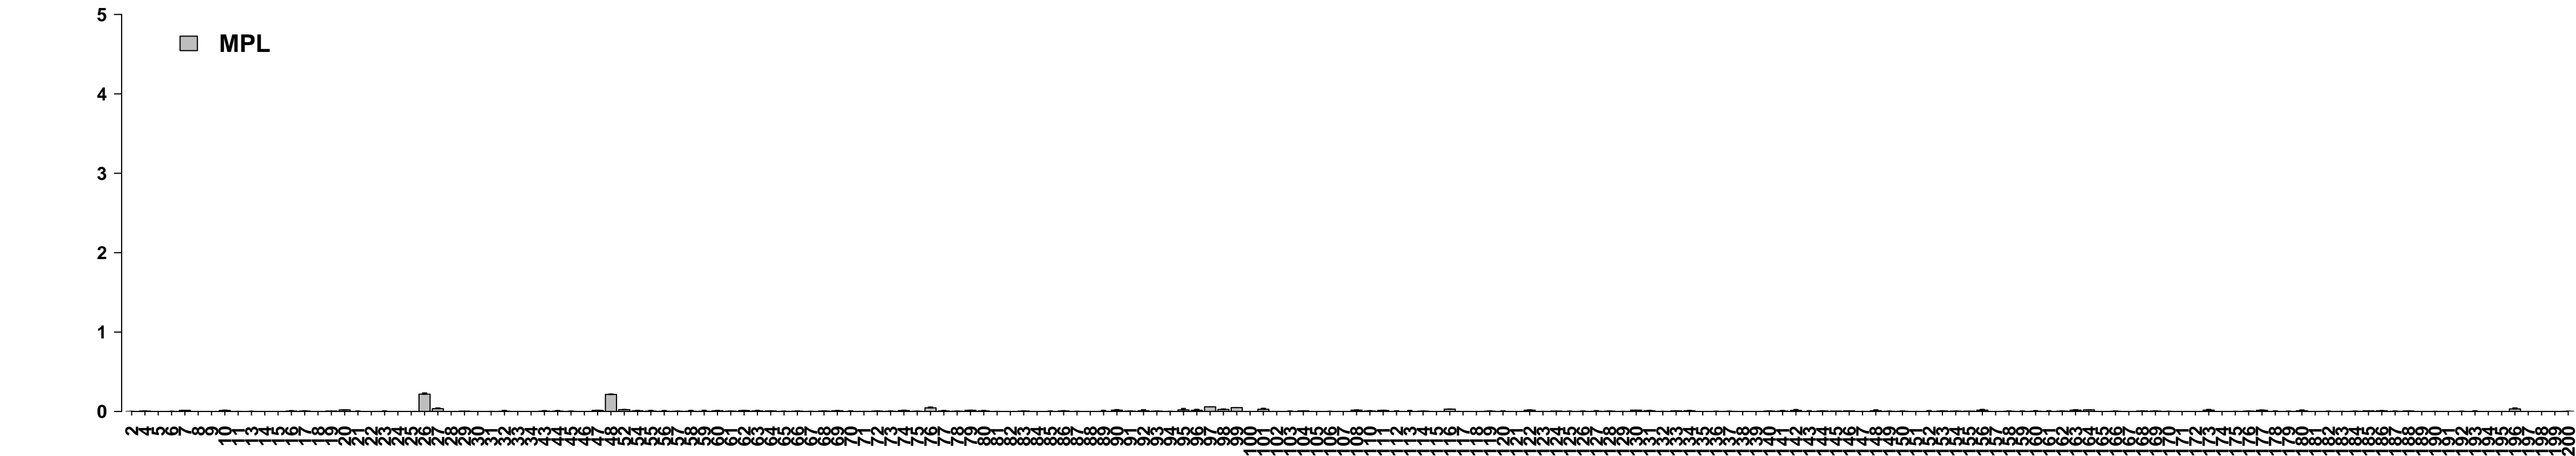

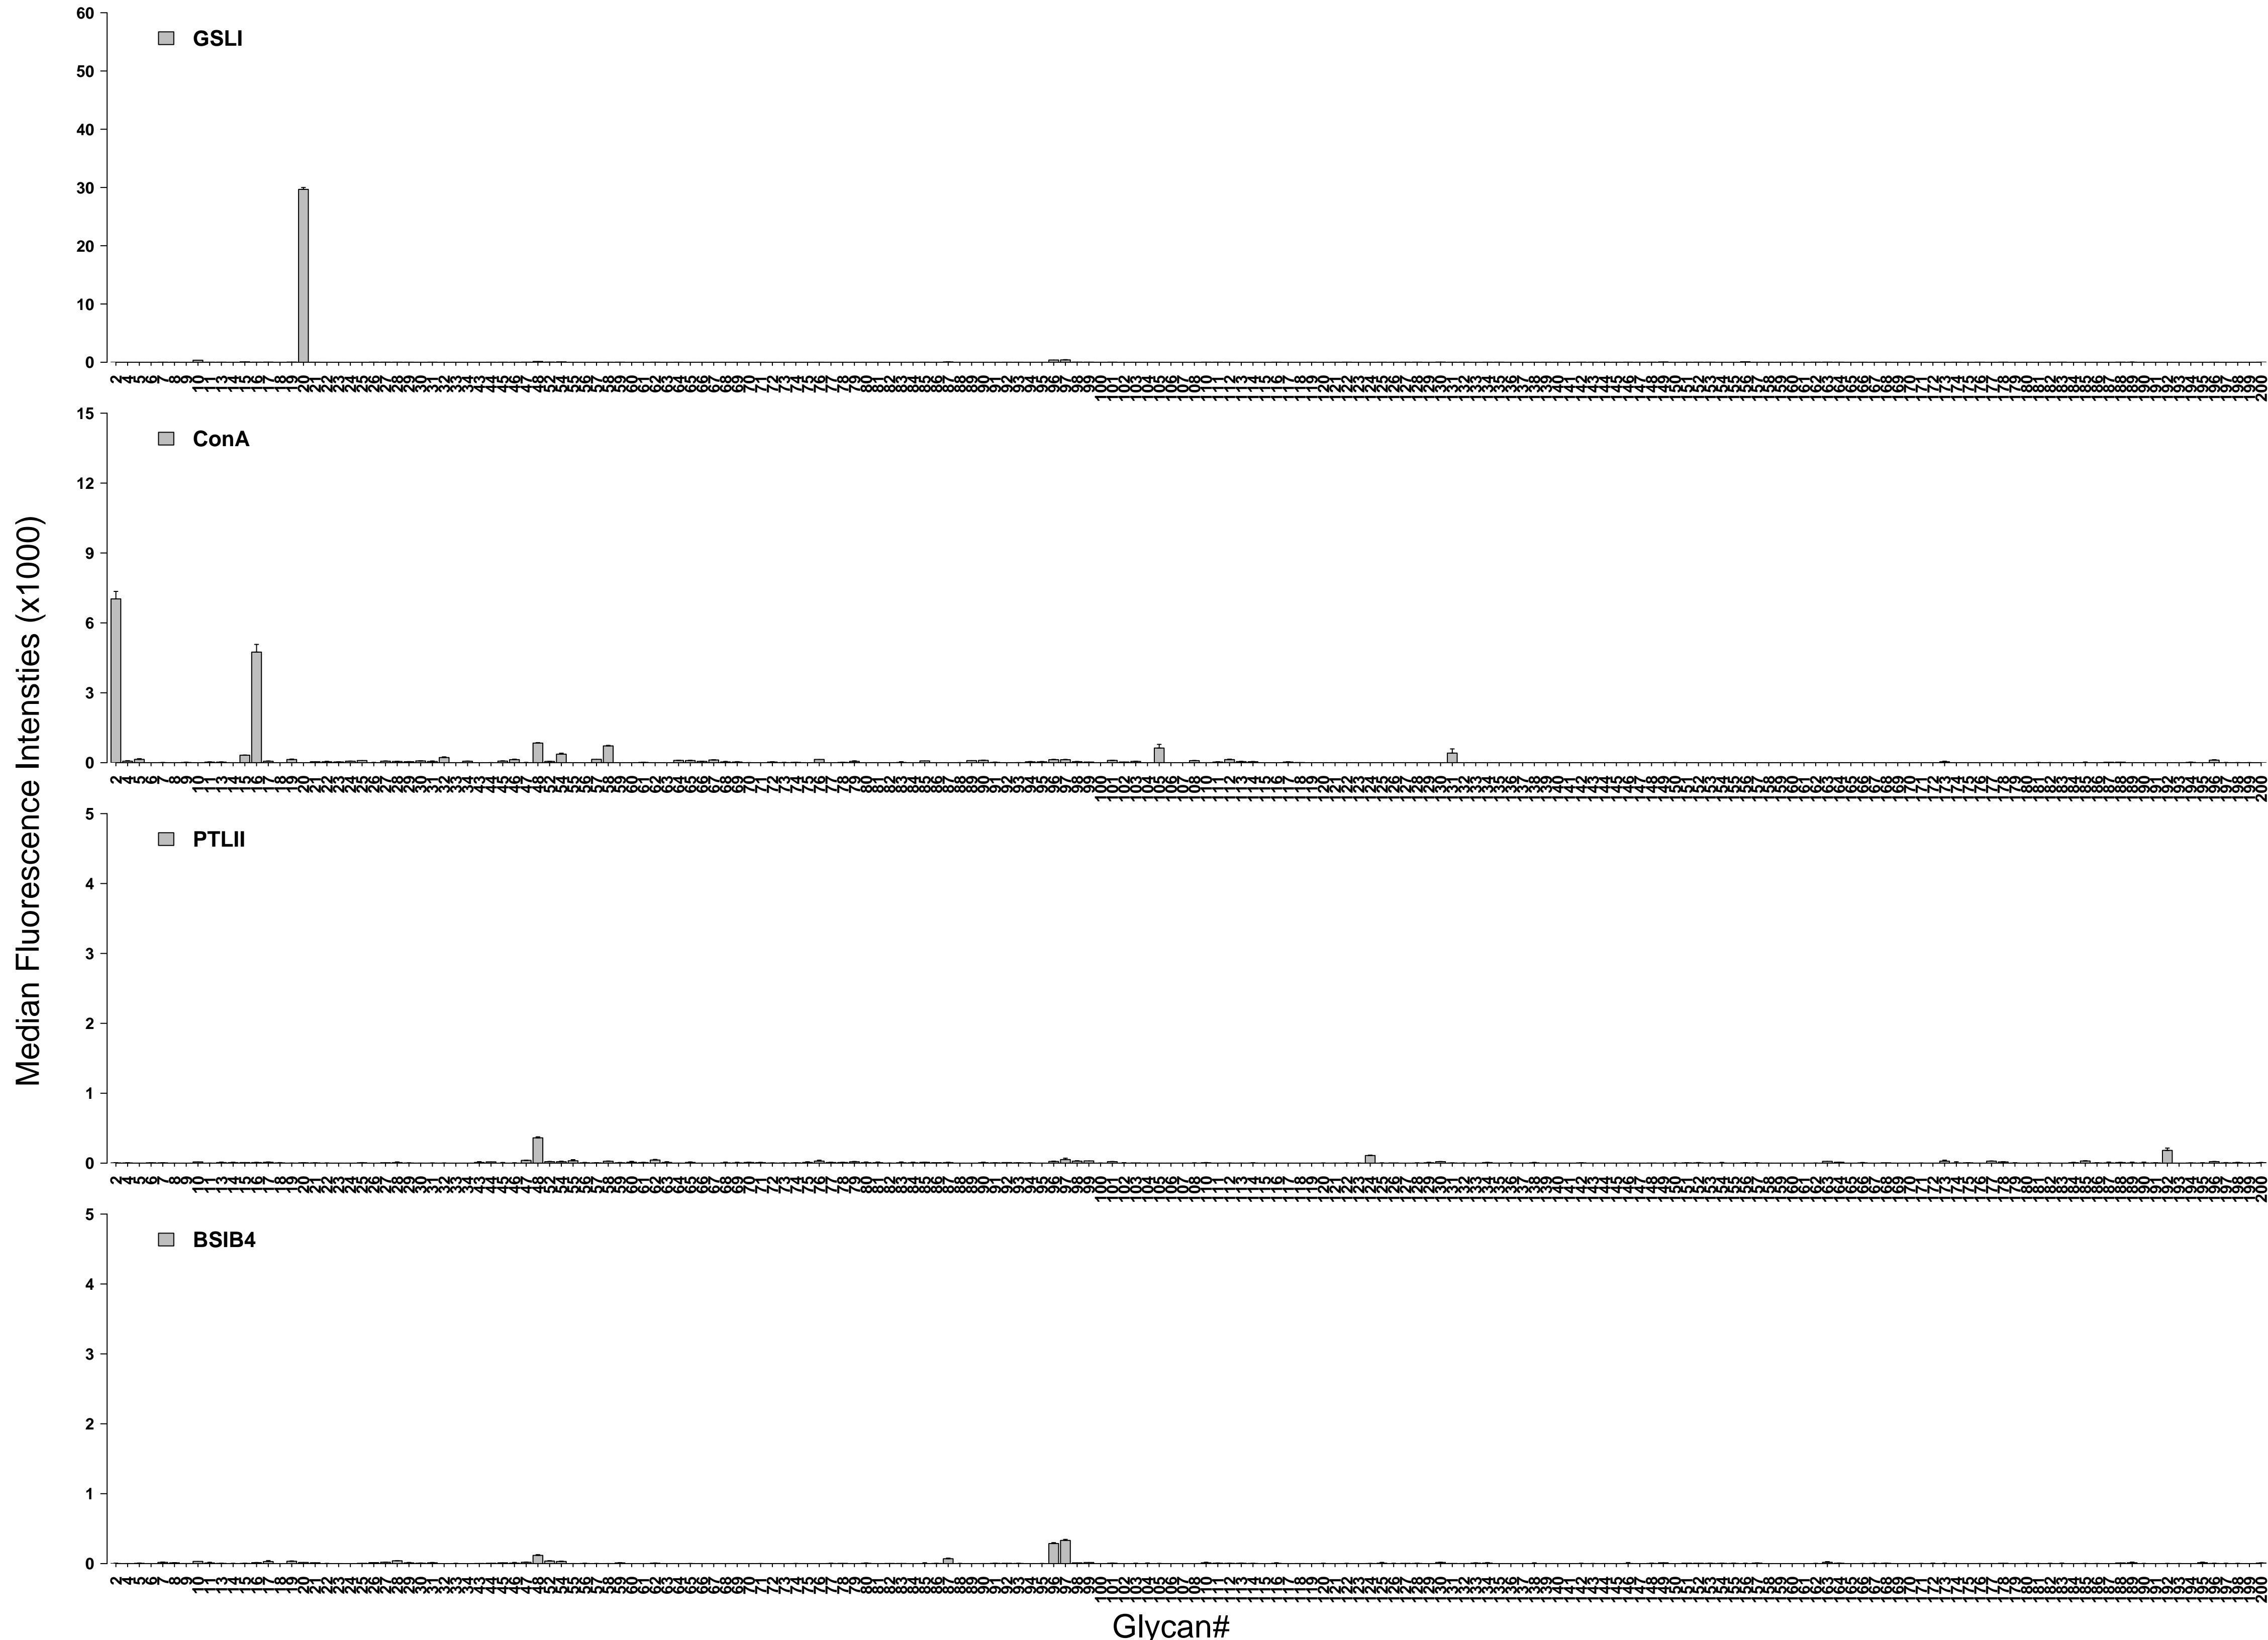

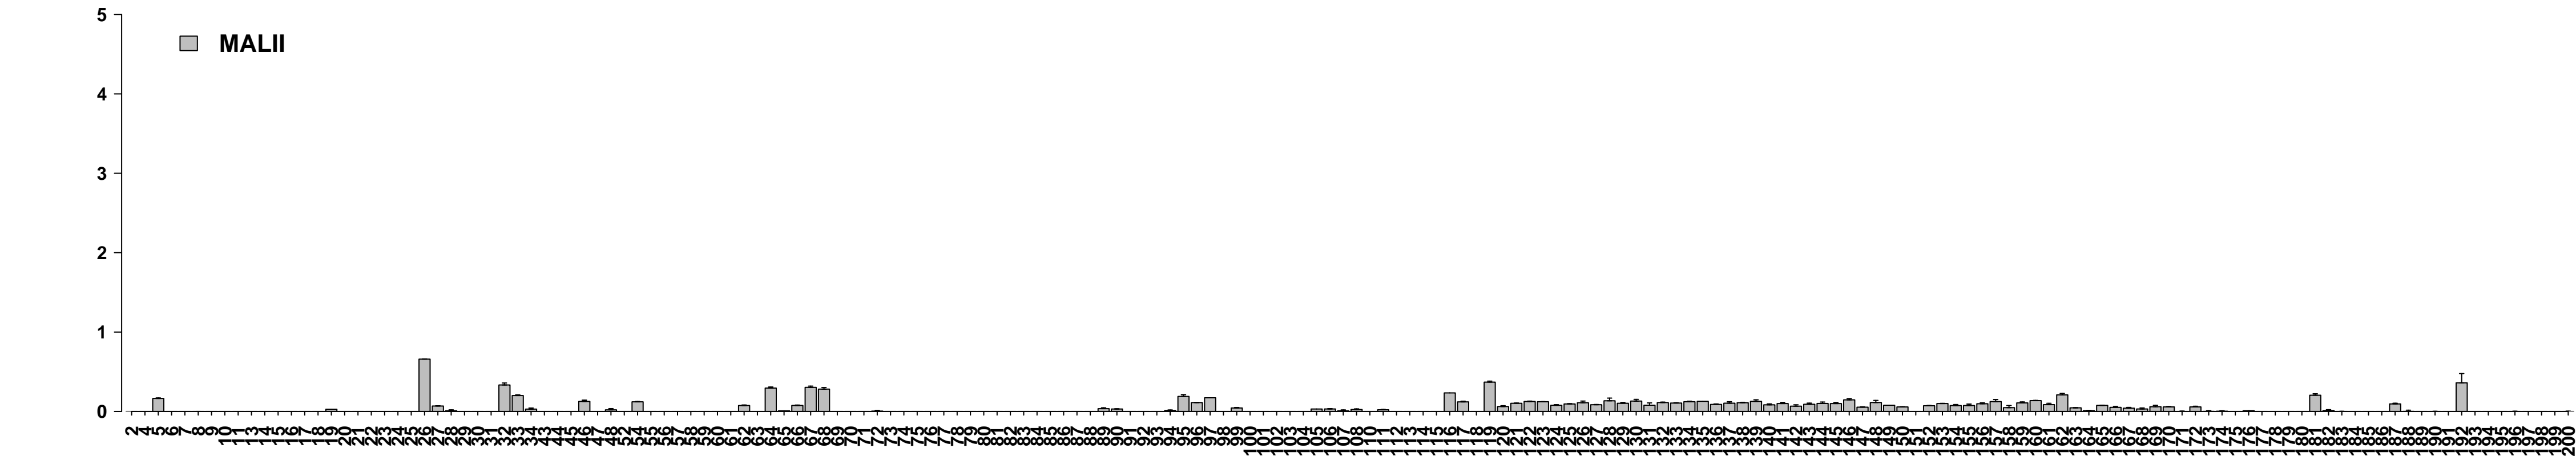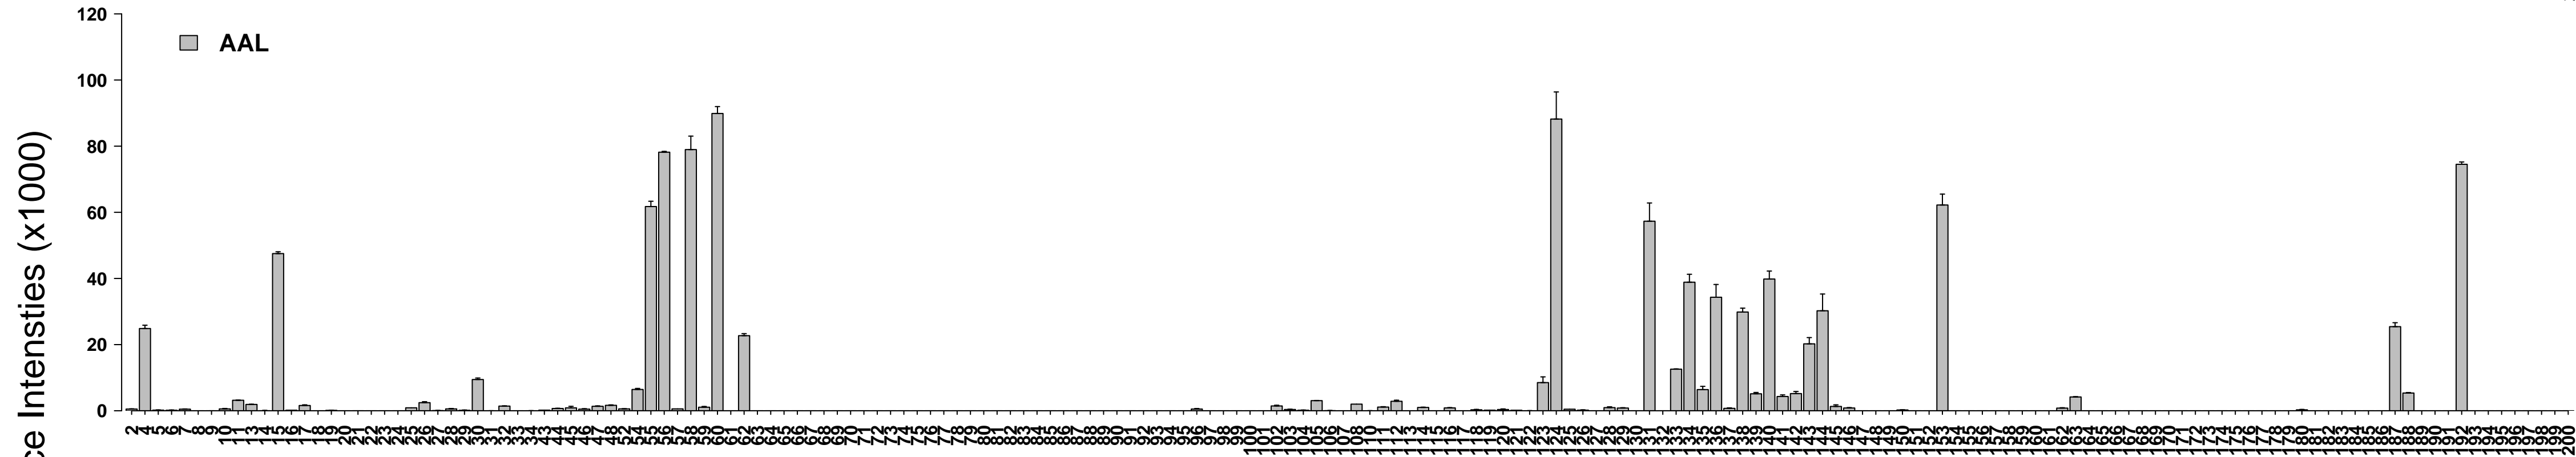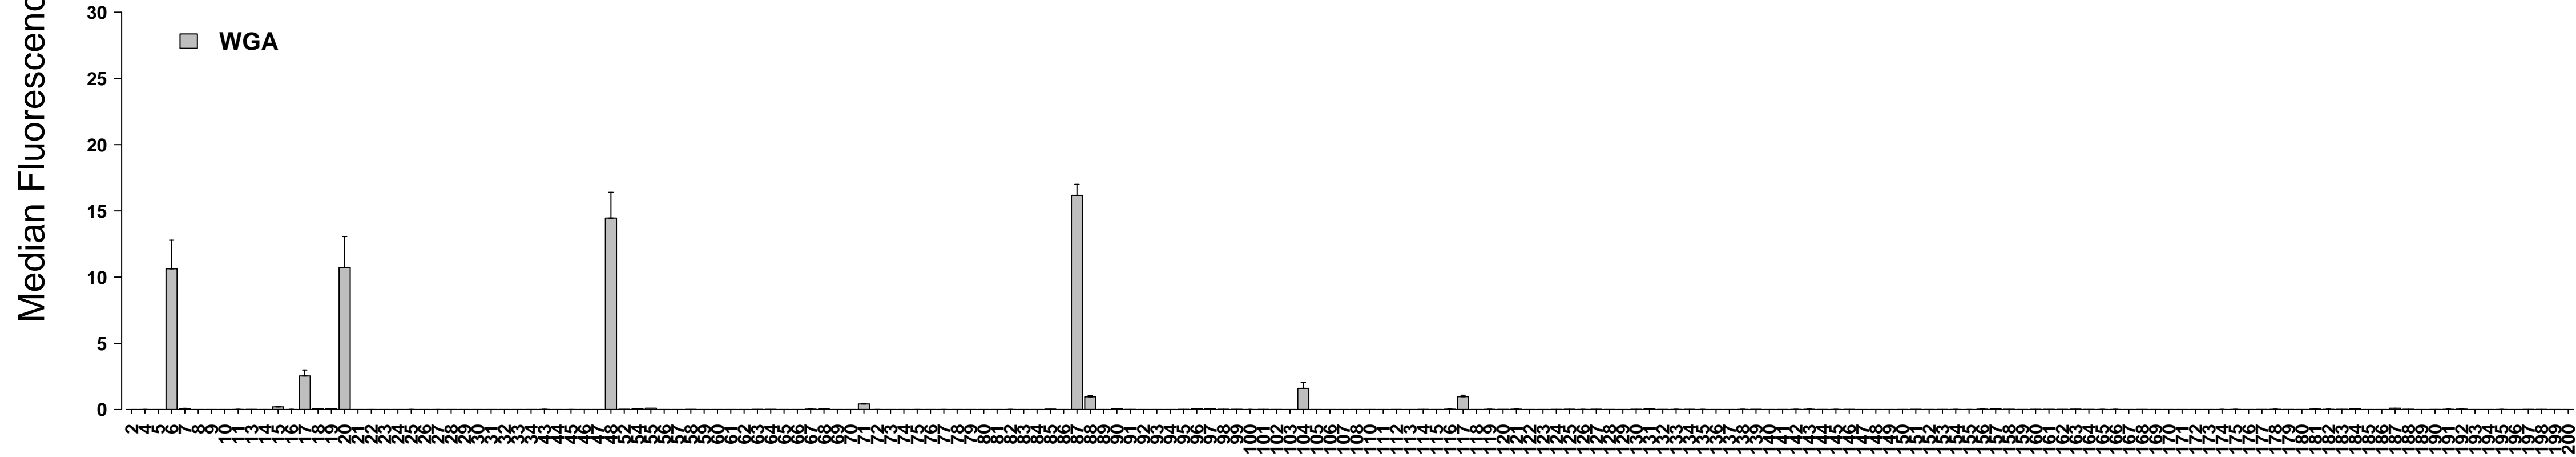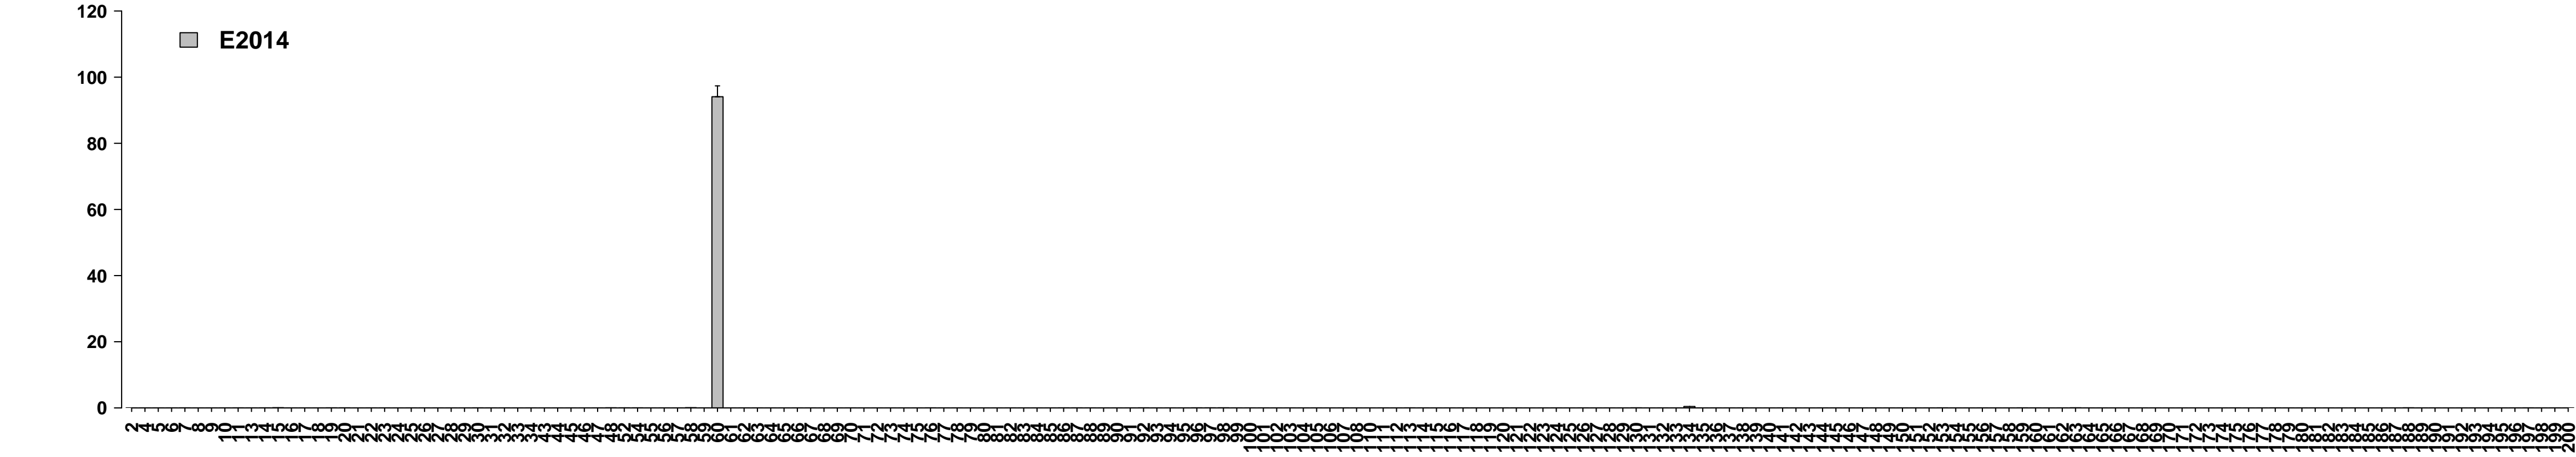

Glycan#

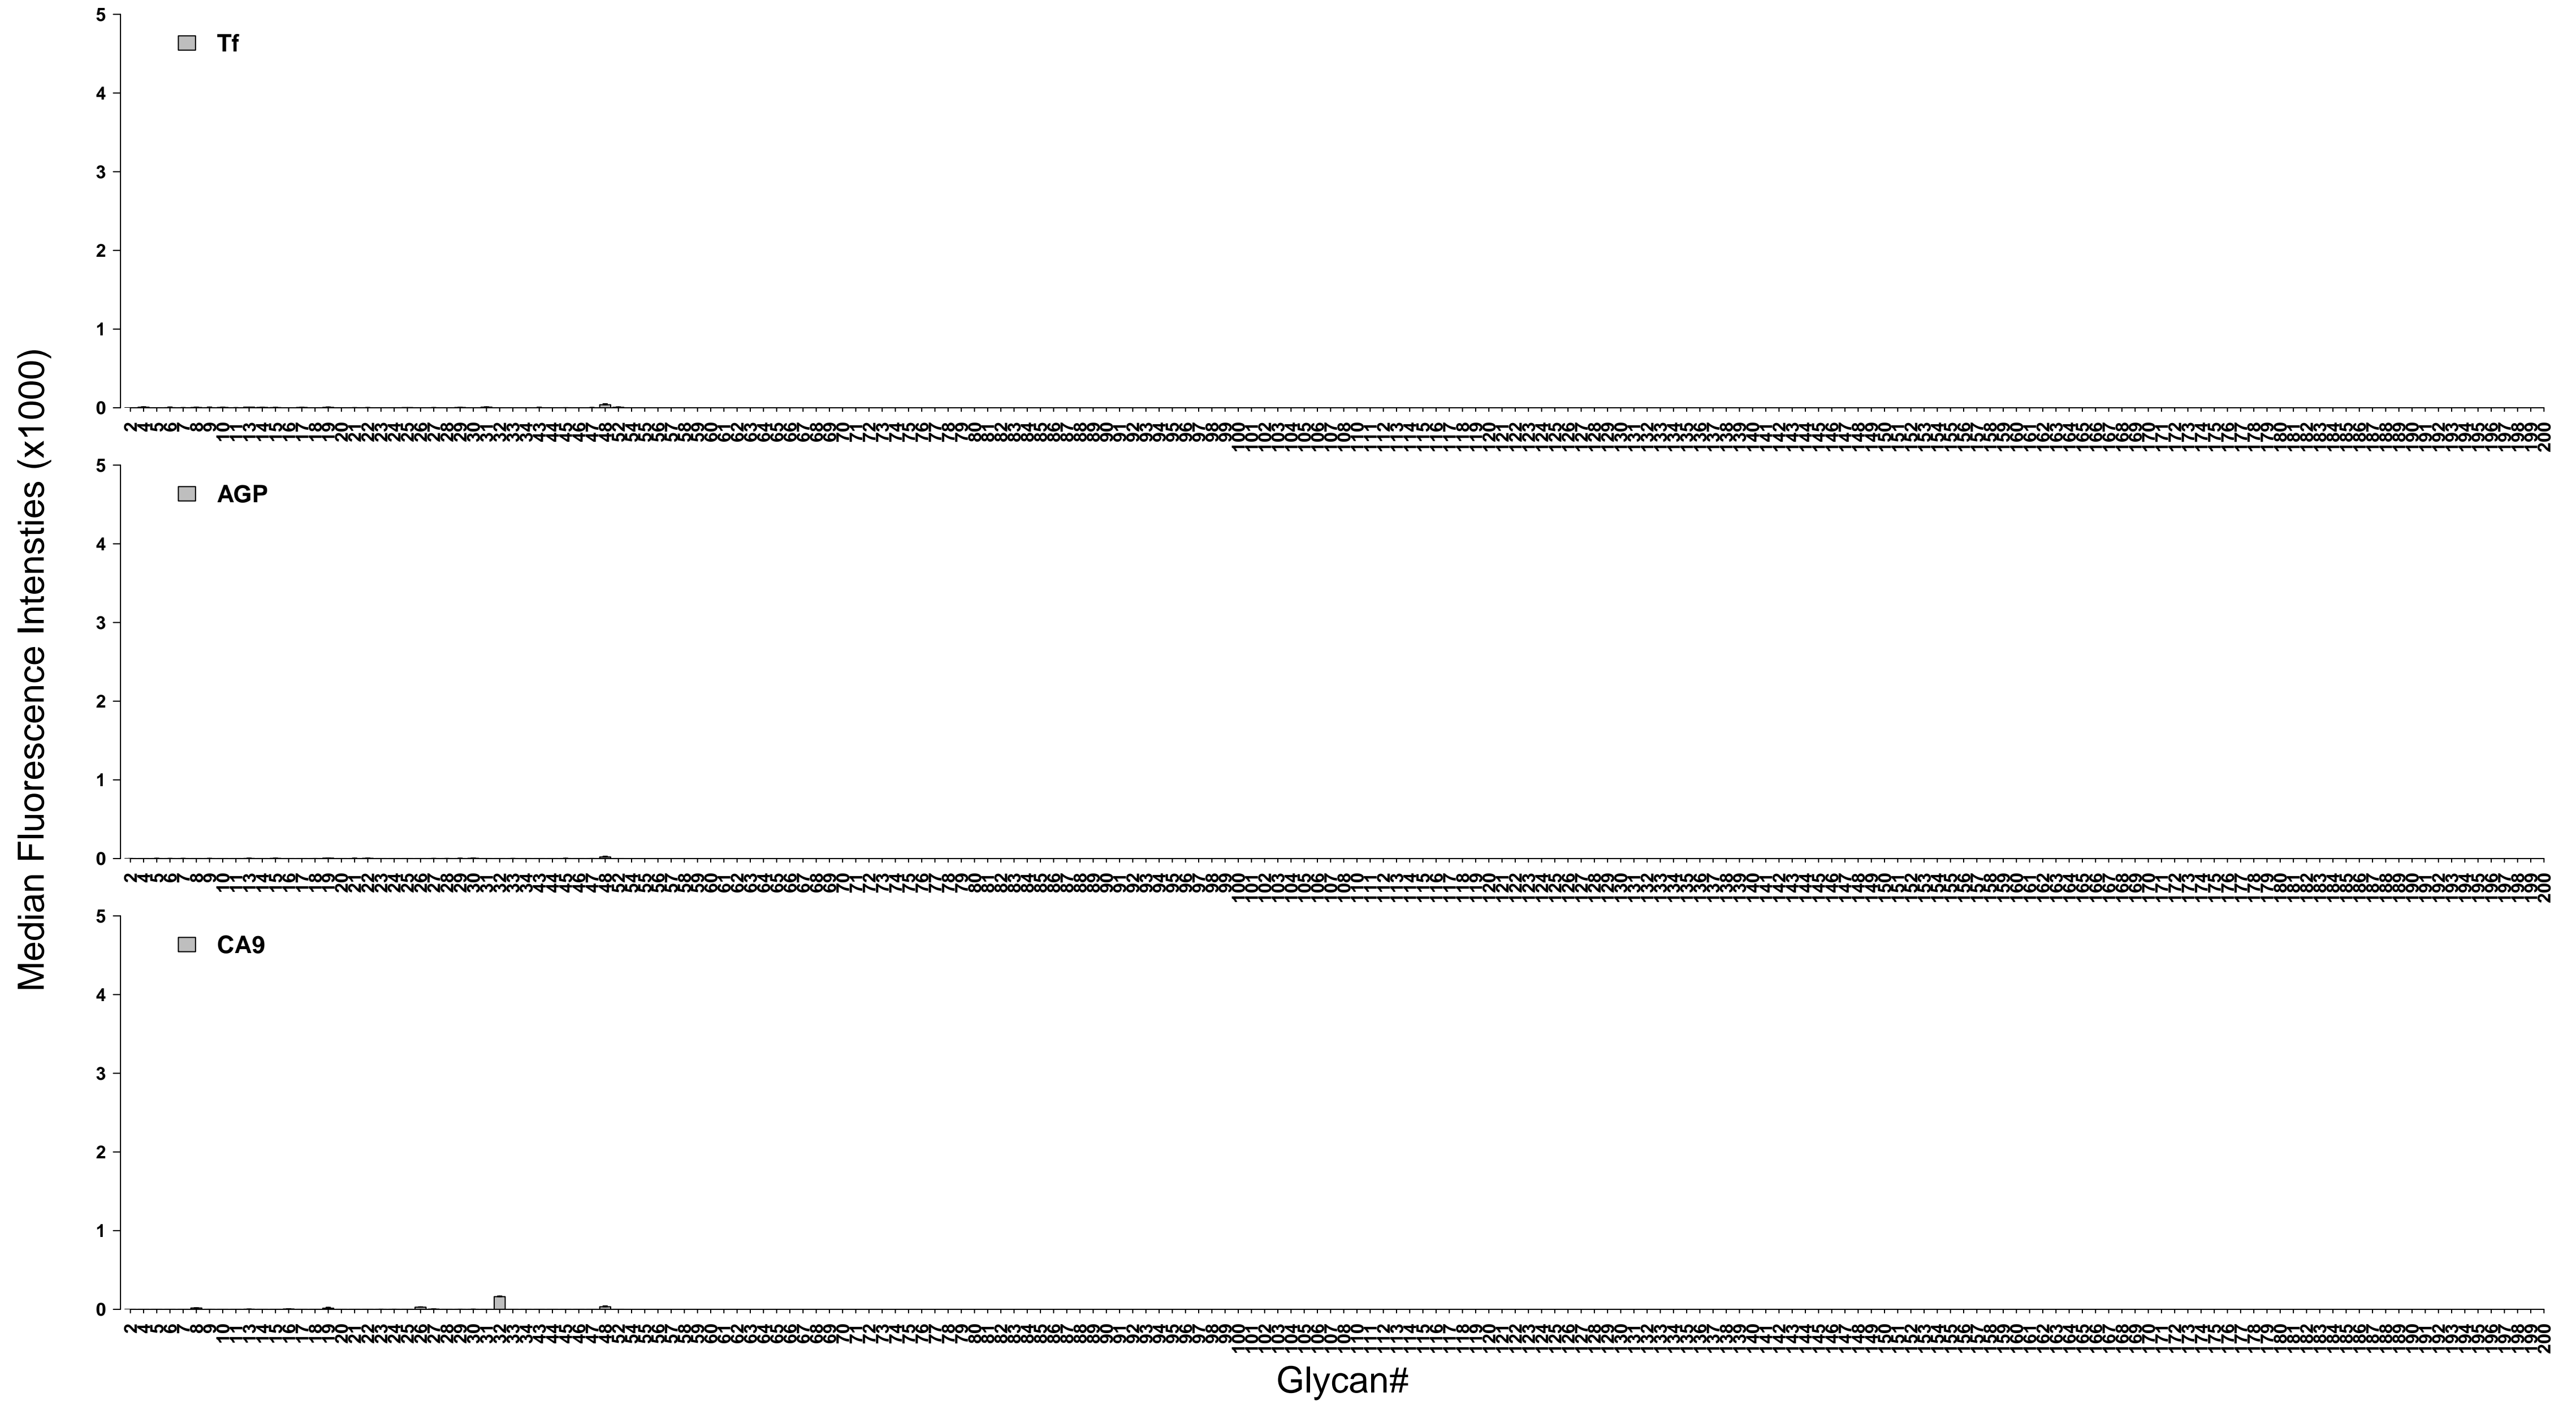

Supplementary Figure 3: Barplots displaying lectin binding to the glycans on MGBA. Briefly, 5ug/ml of lectins, except for AAL (1ug/ml), was used for the binding assay. The experiment was performed in duplicate wells and data were shown as mean MFI + SD. Several purified proteins were included as negative controls. An in-house anti-LeY IgG antibody (E2014) was used as a positive control. Data is presented and mean+SD of two replicates, each experiment was repeated 3 times.

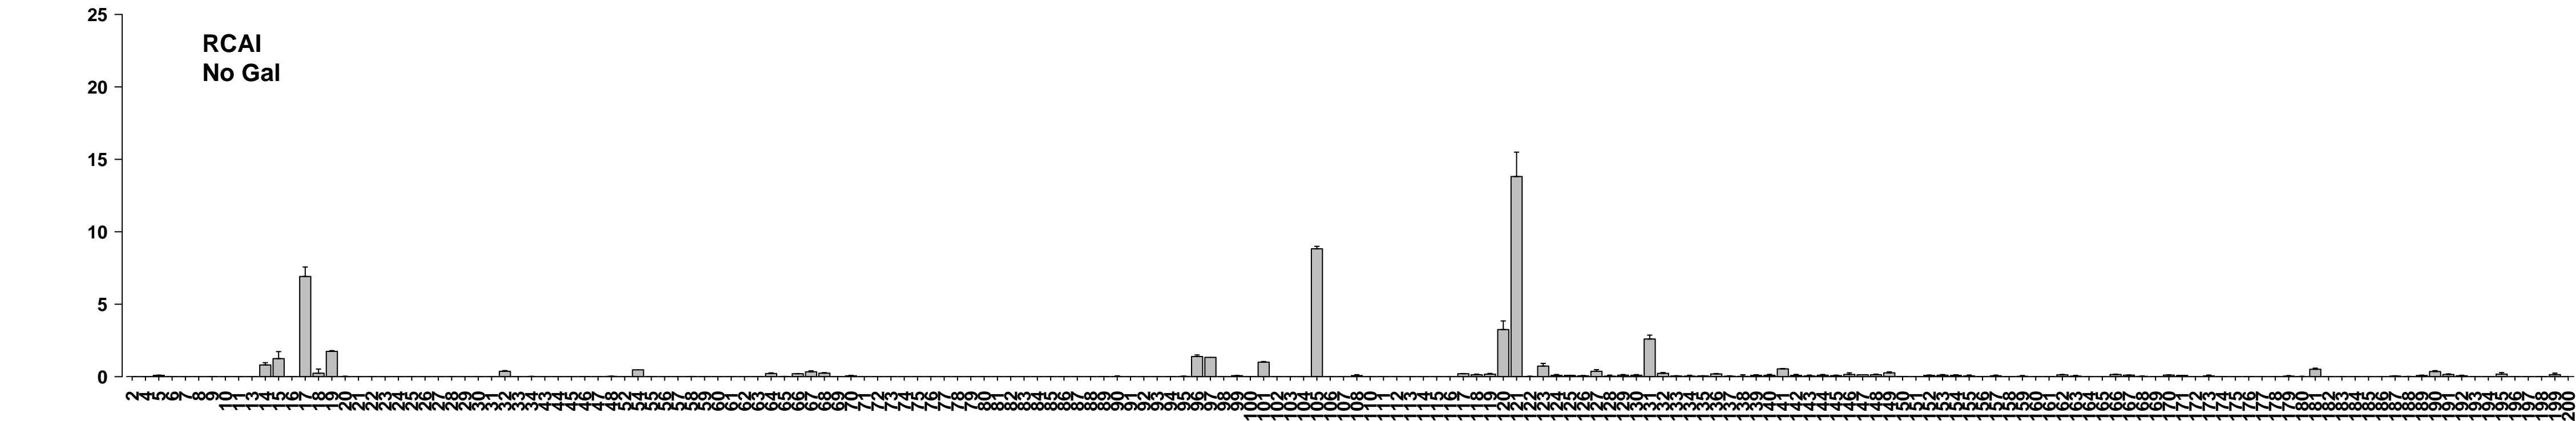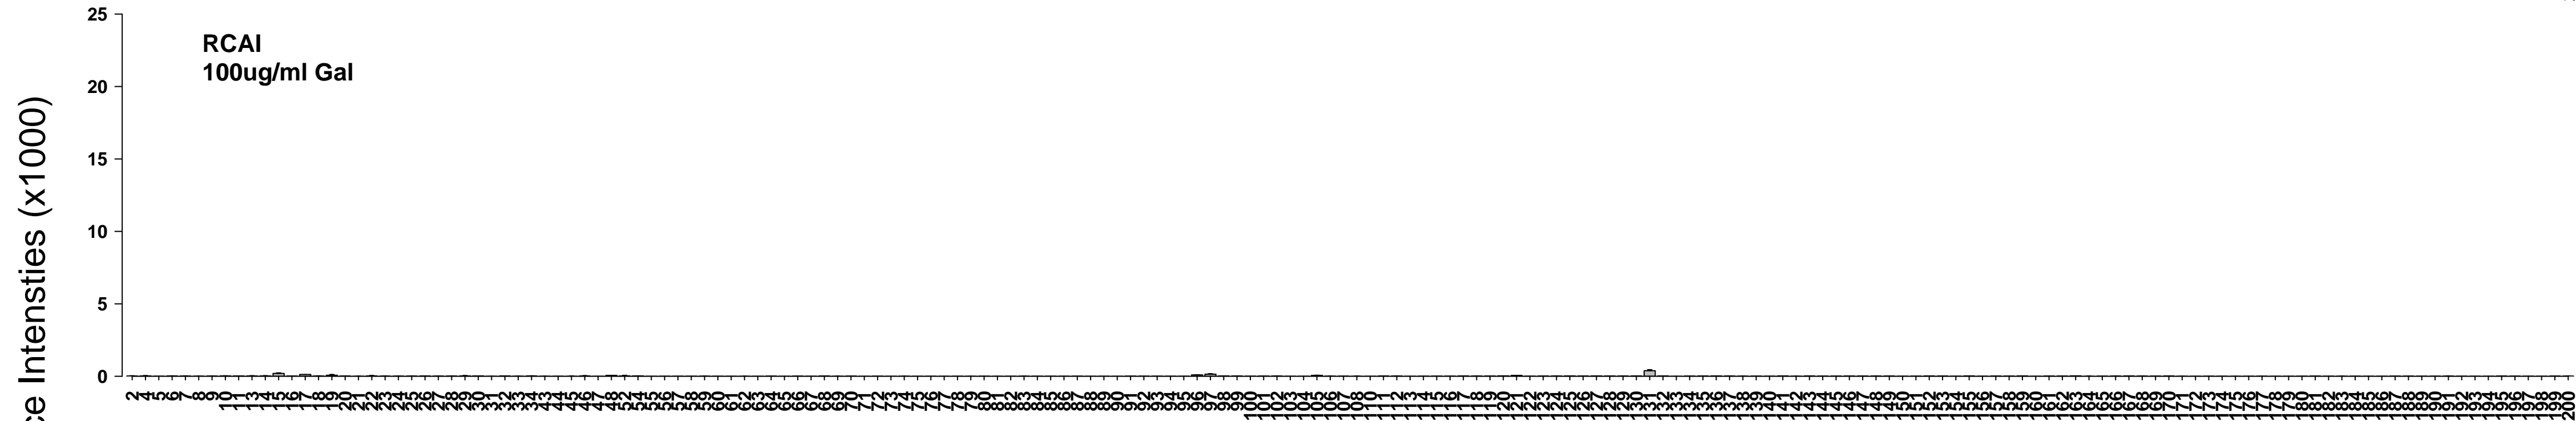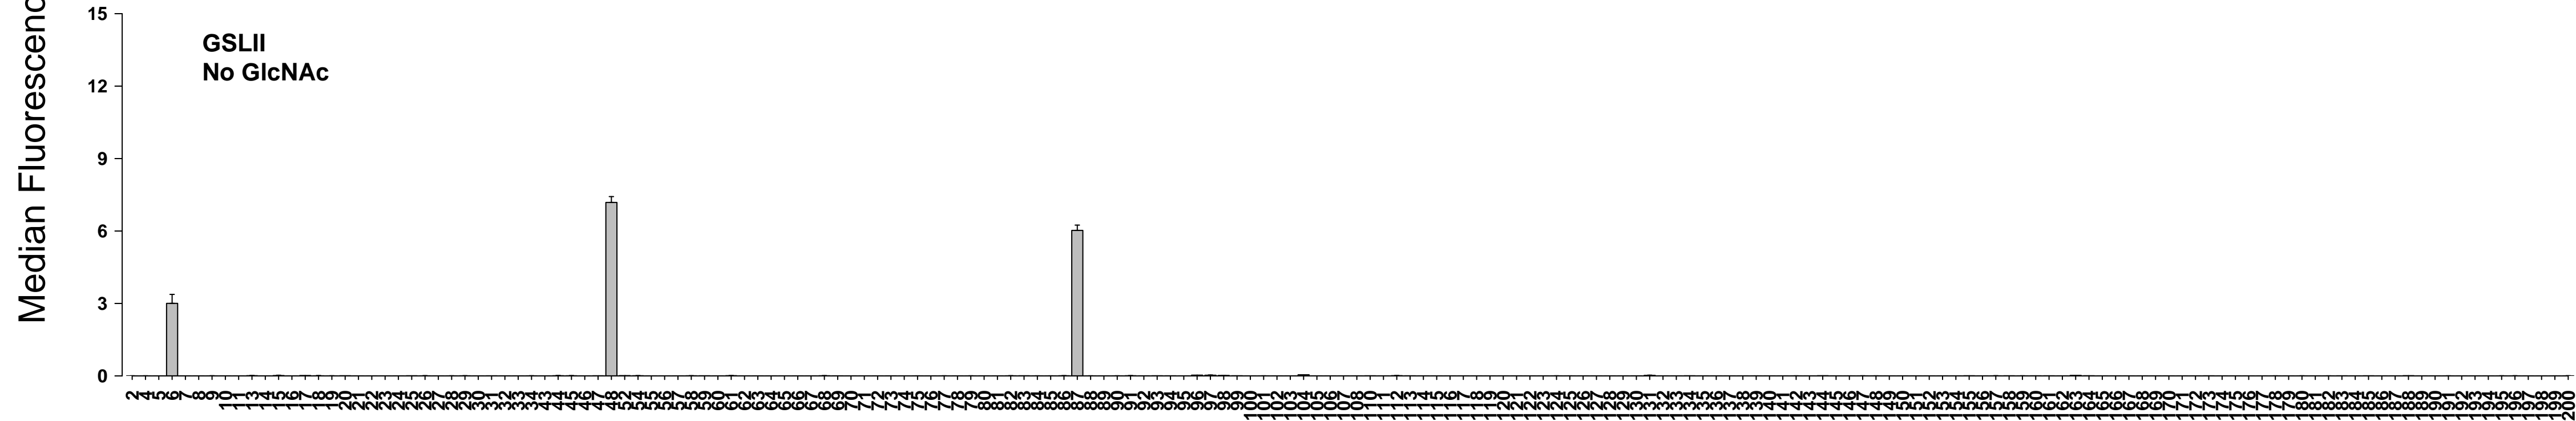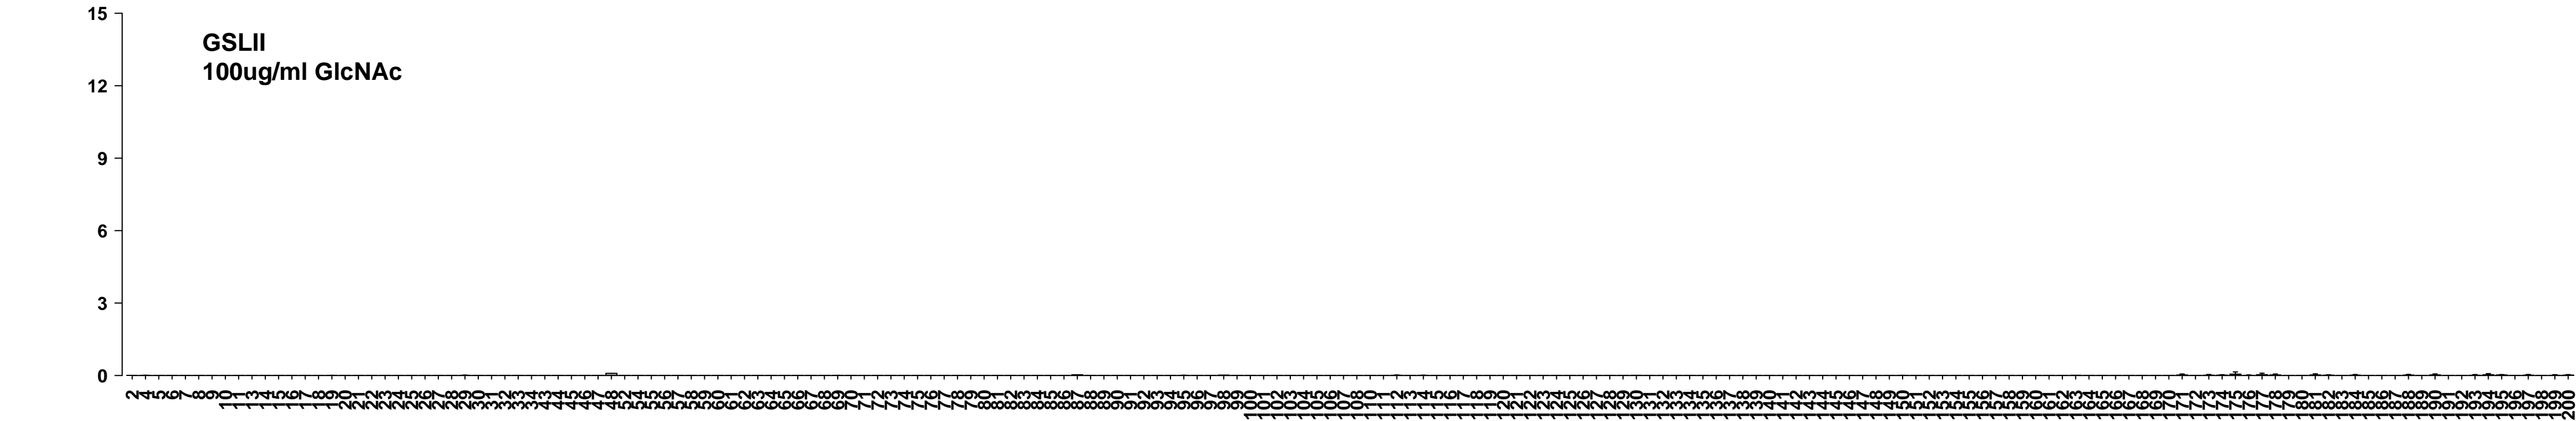

Glycan#

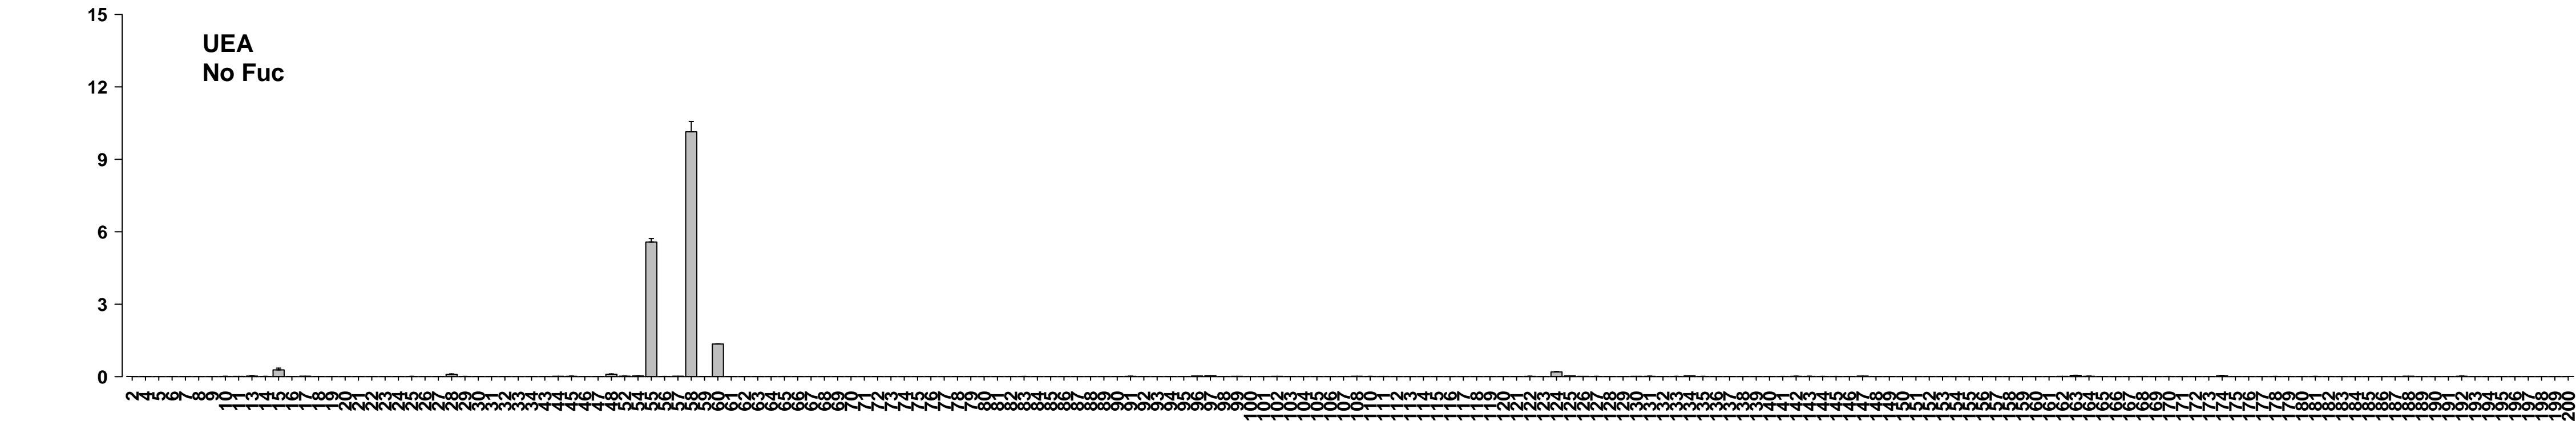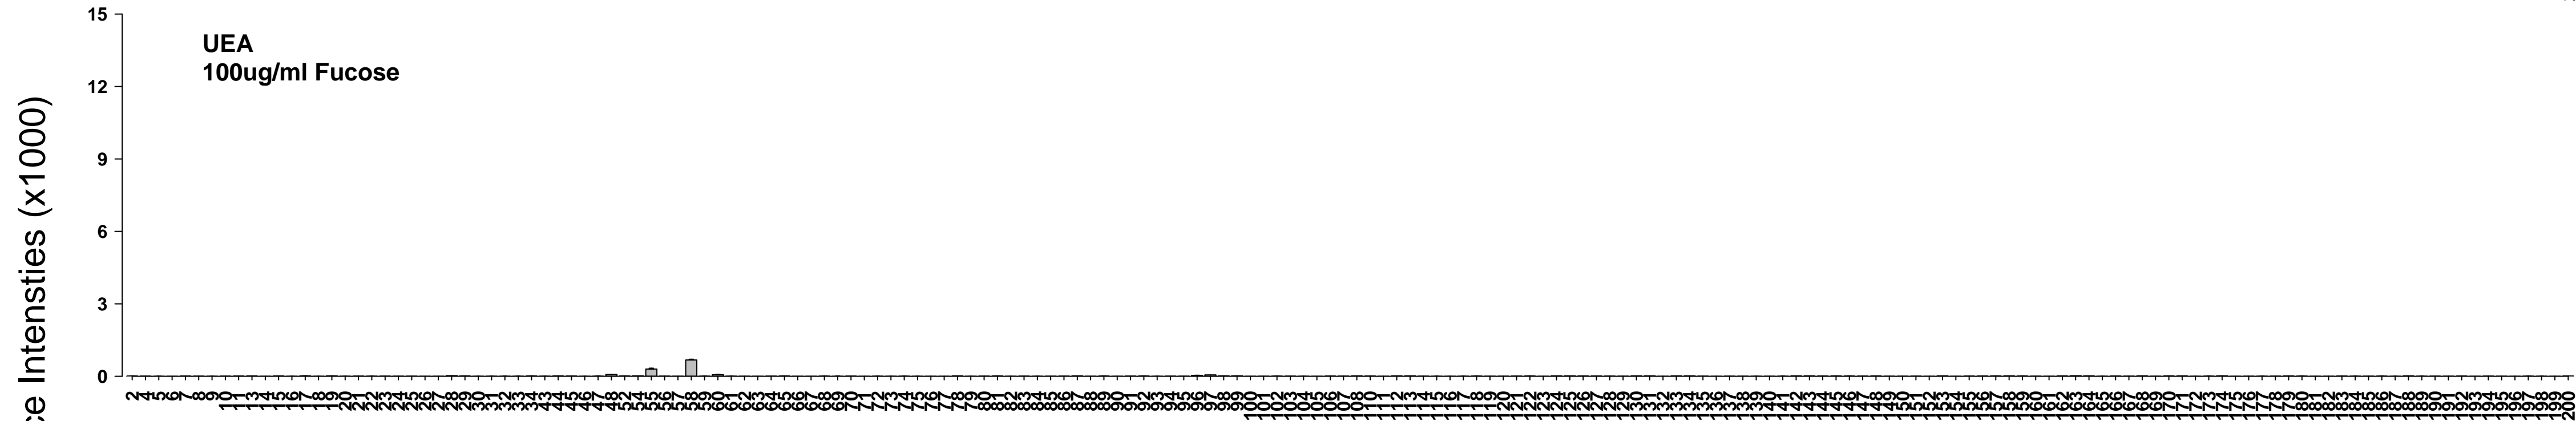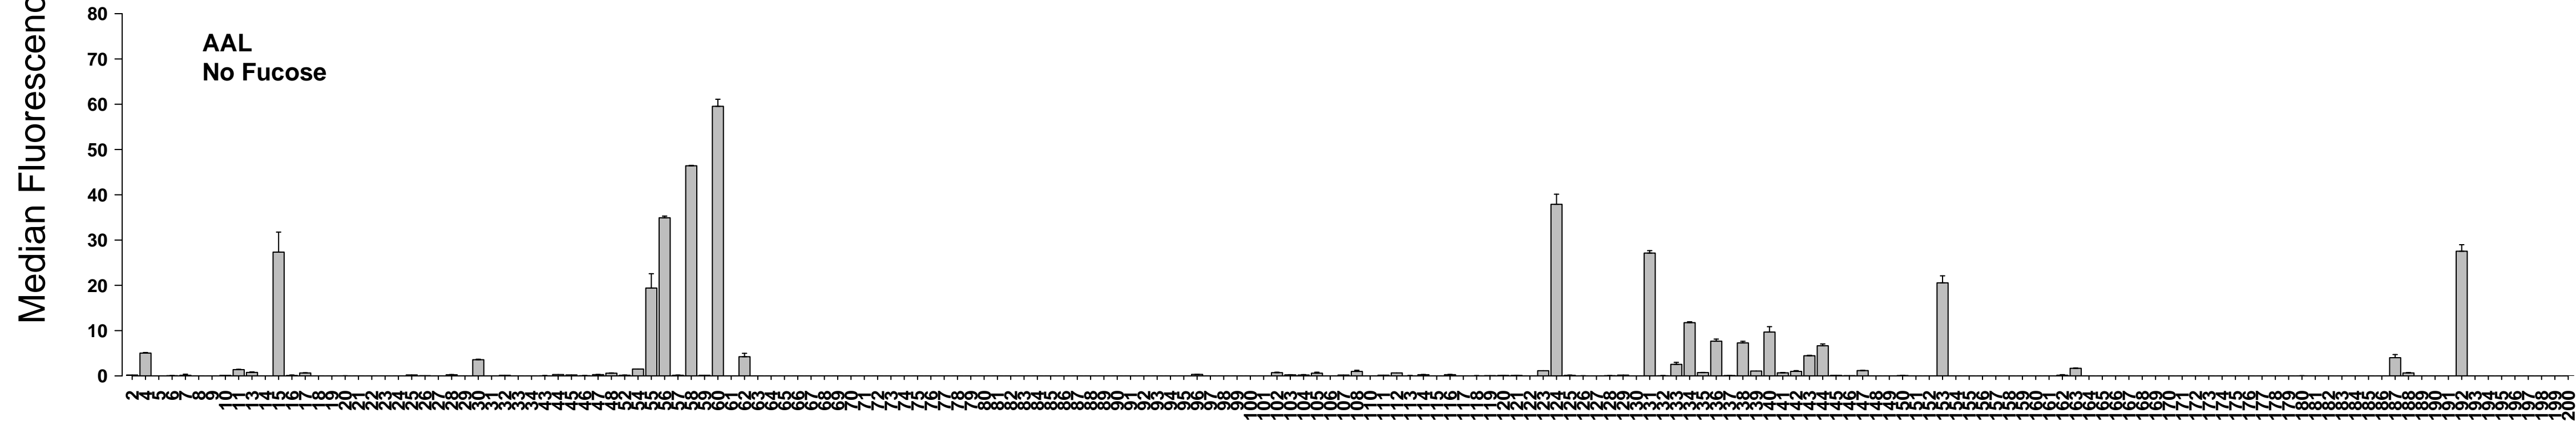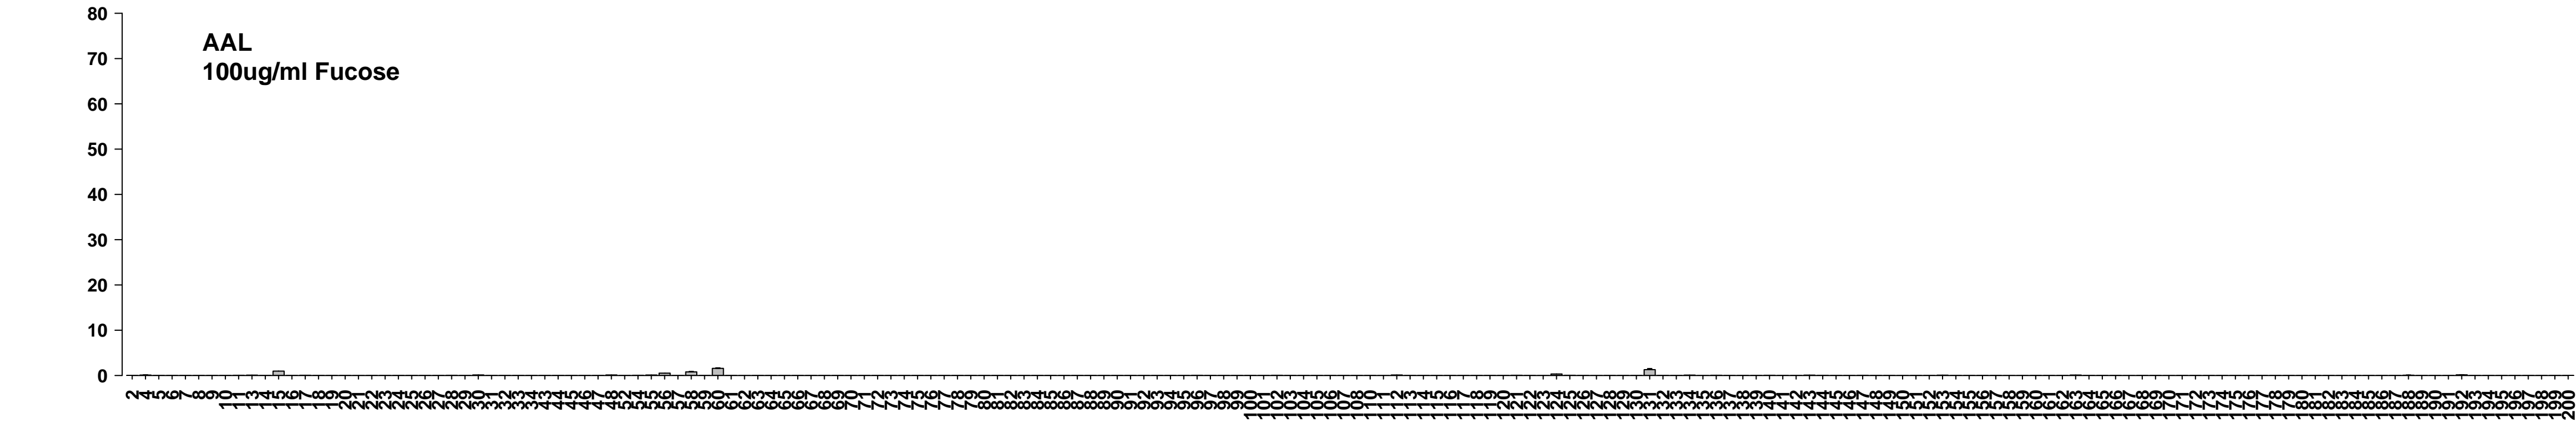

Glycan#

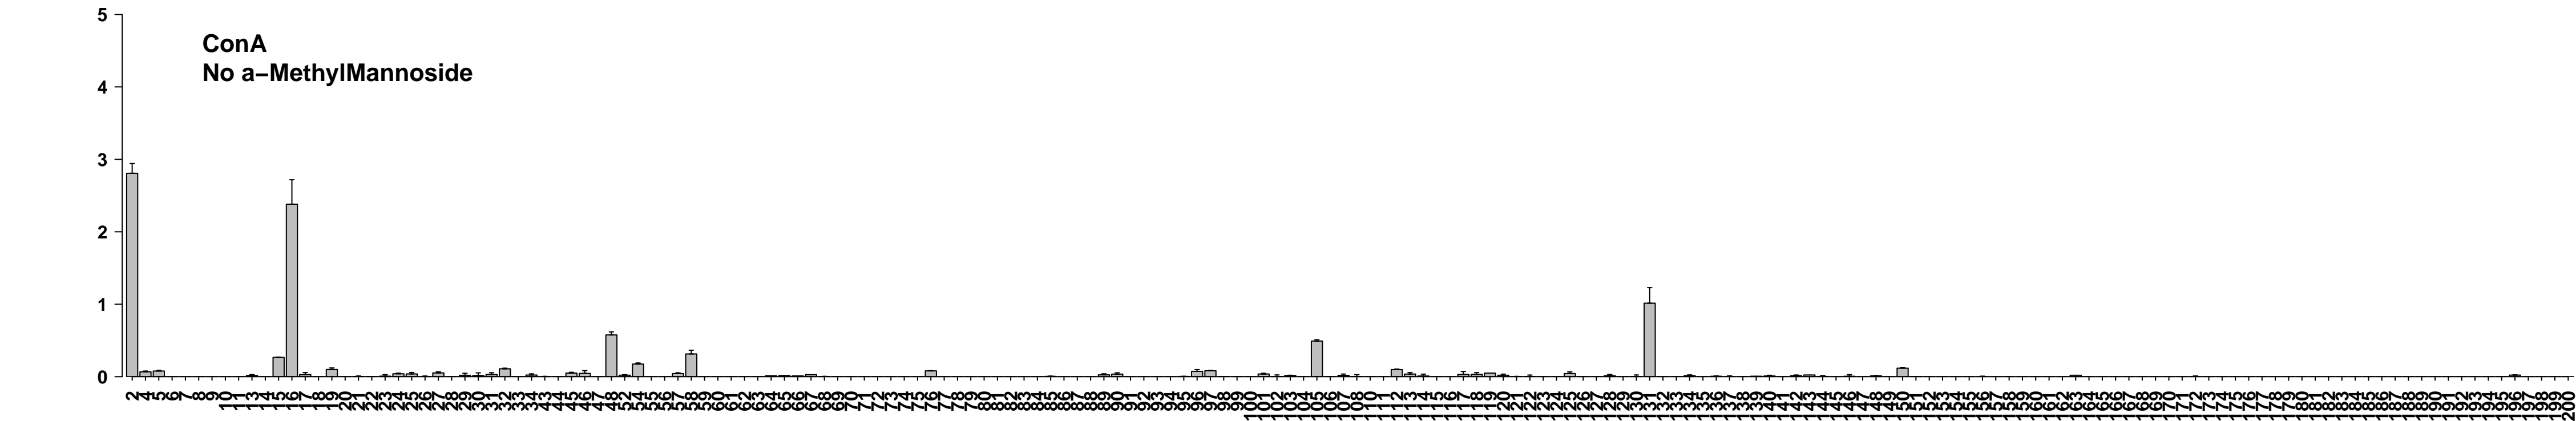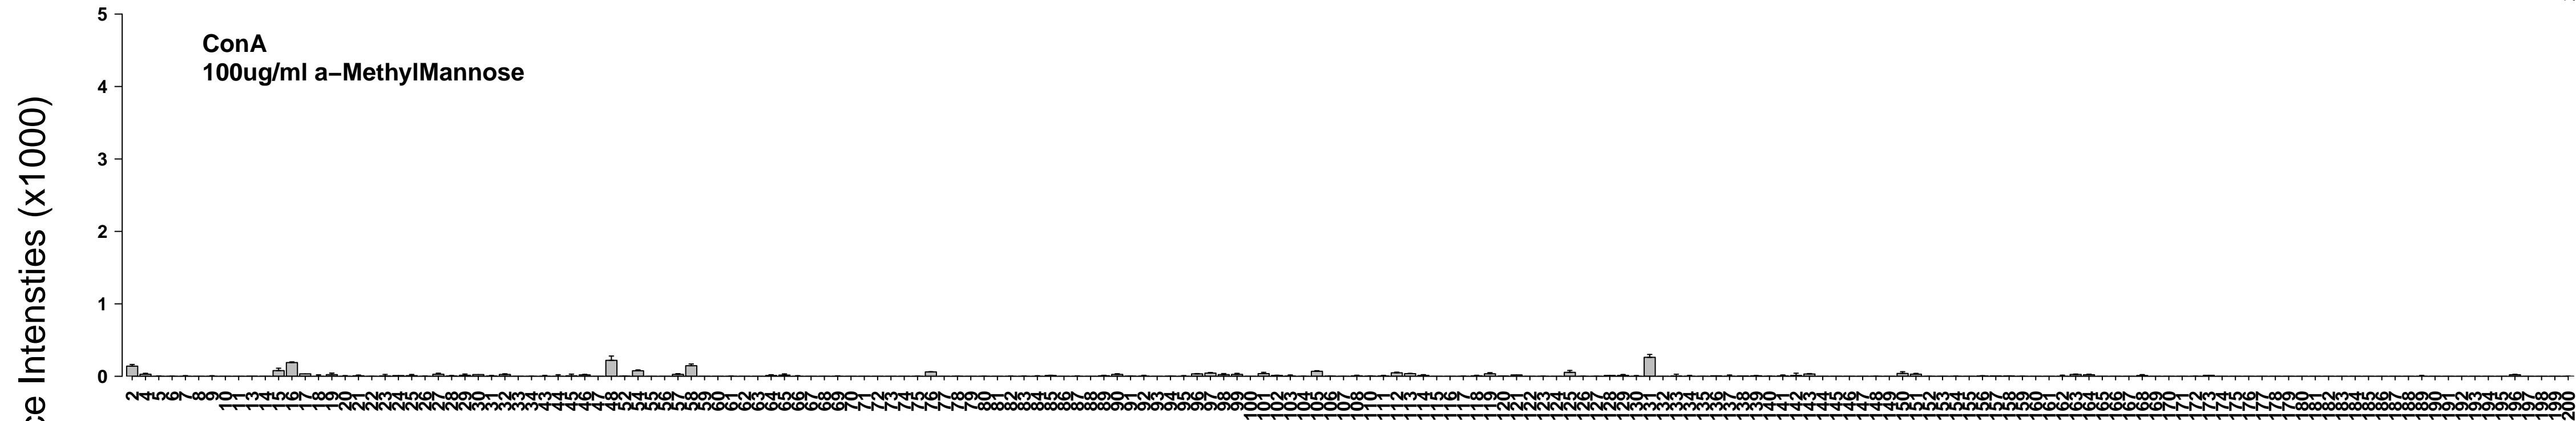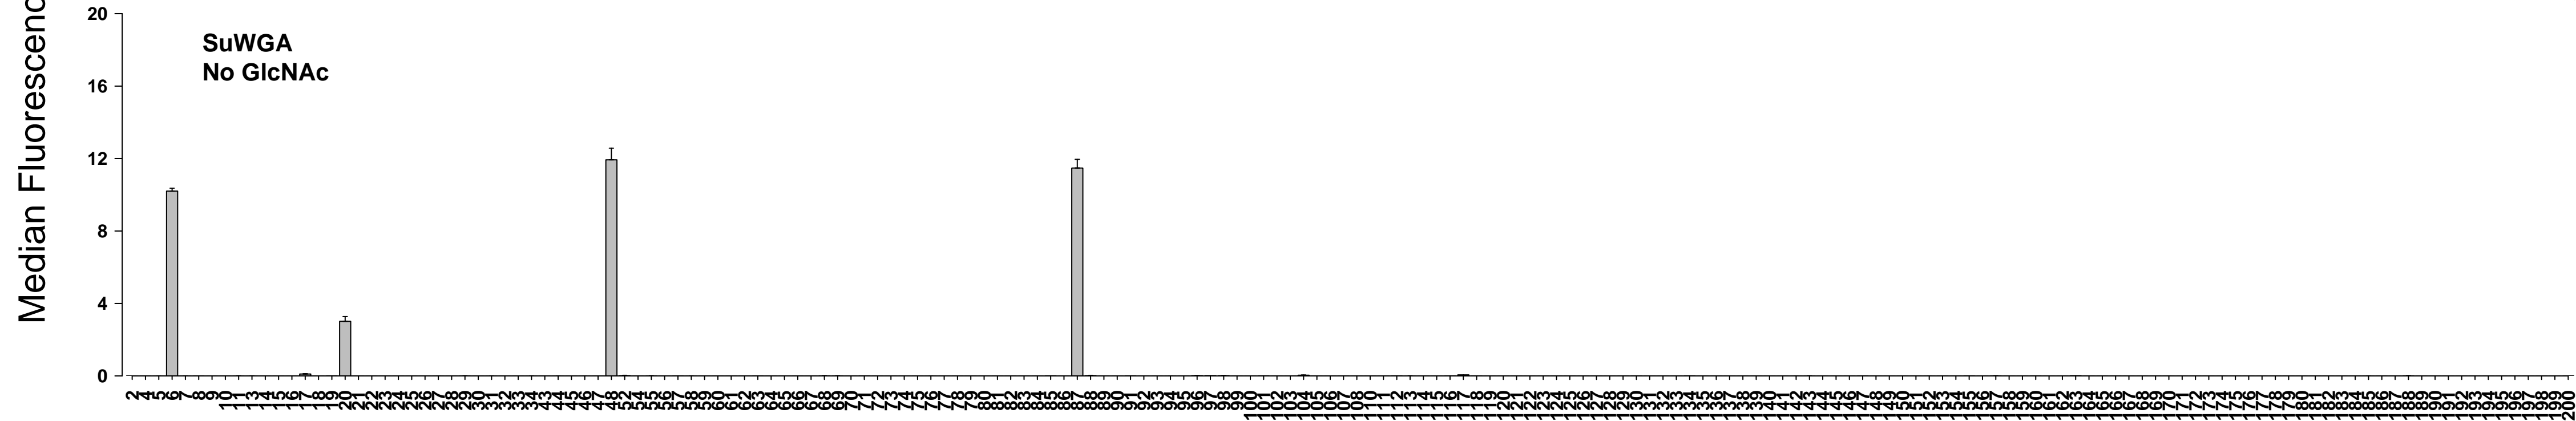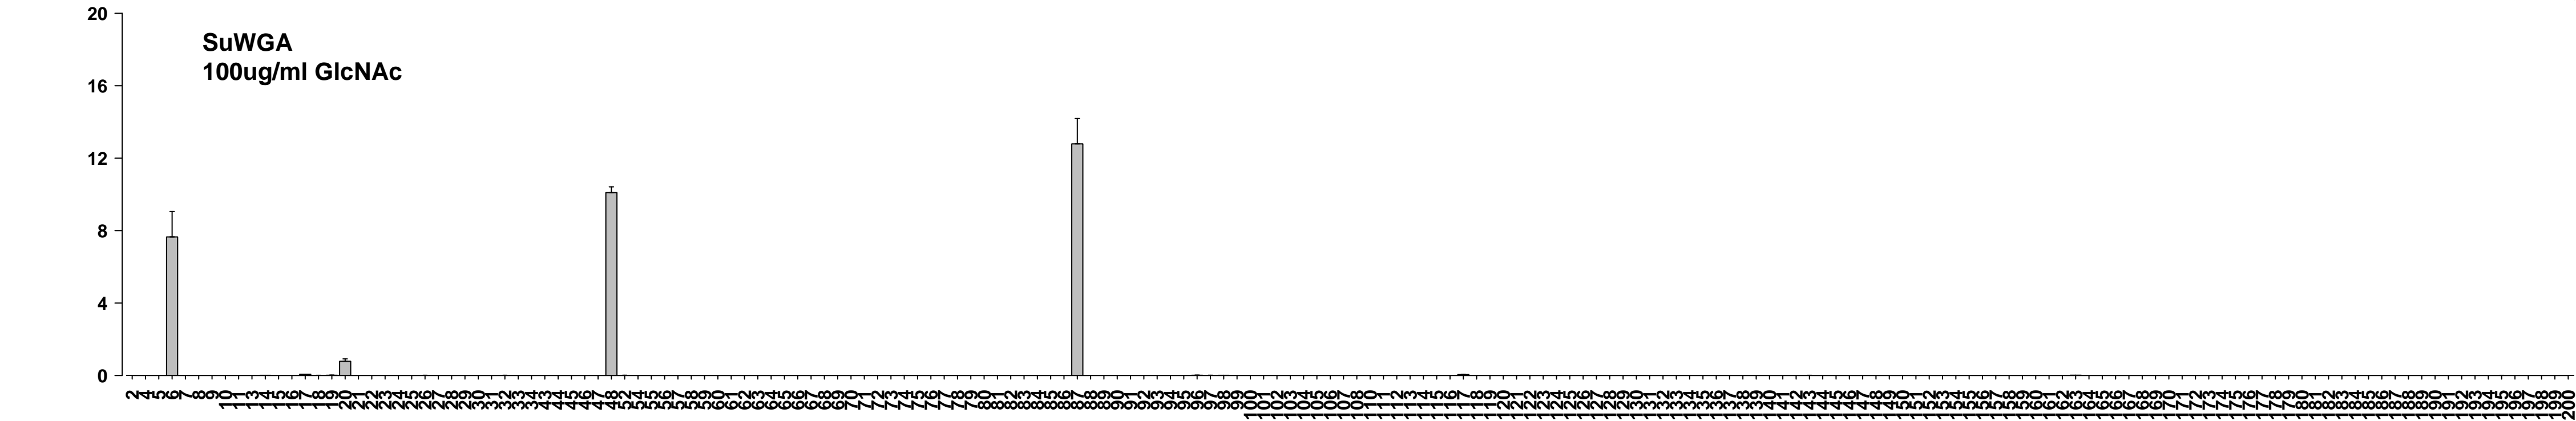

Glycan#



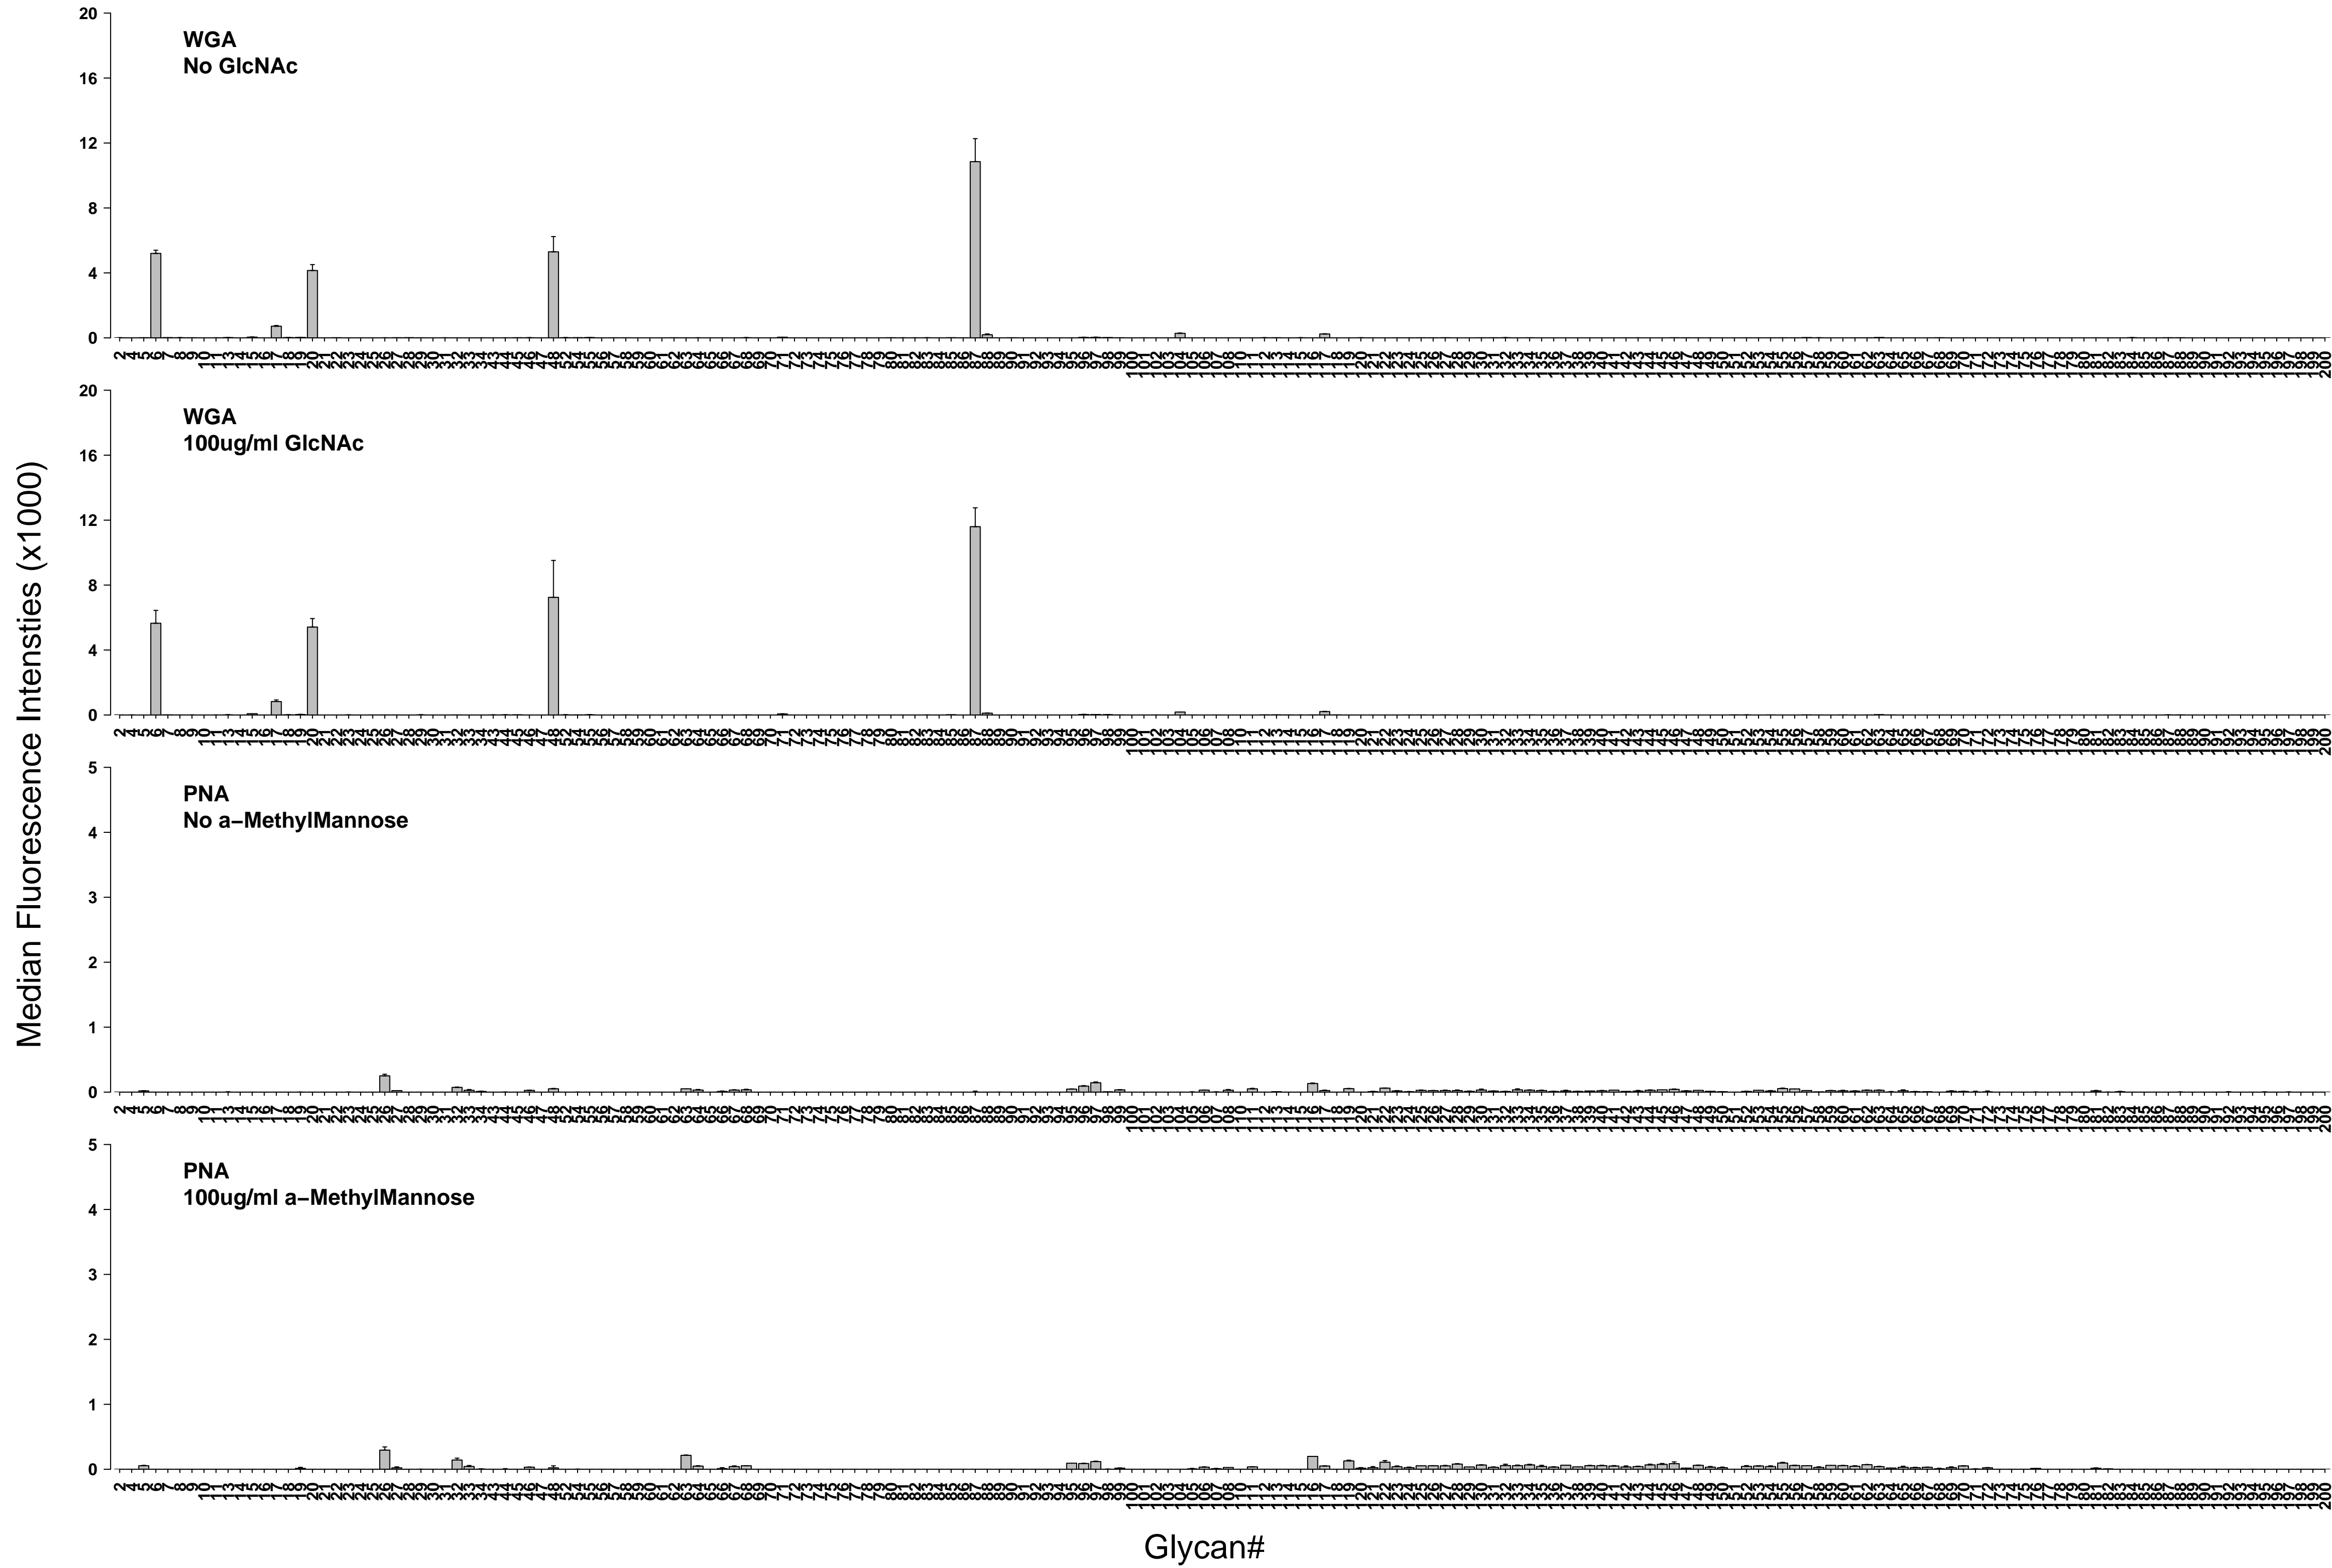

Supplementary Figure 4: Inhibition of lectin binding by monosaccharides. Lectins (5ug/ml), except for AAL (1ug/ml), and their respective inhibitory sugars (100µg/ml) were used in the inhibitory binding array. The data are presented as mean MFI + SD of the duplicate wells for each glycan.

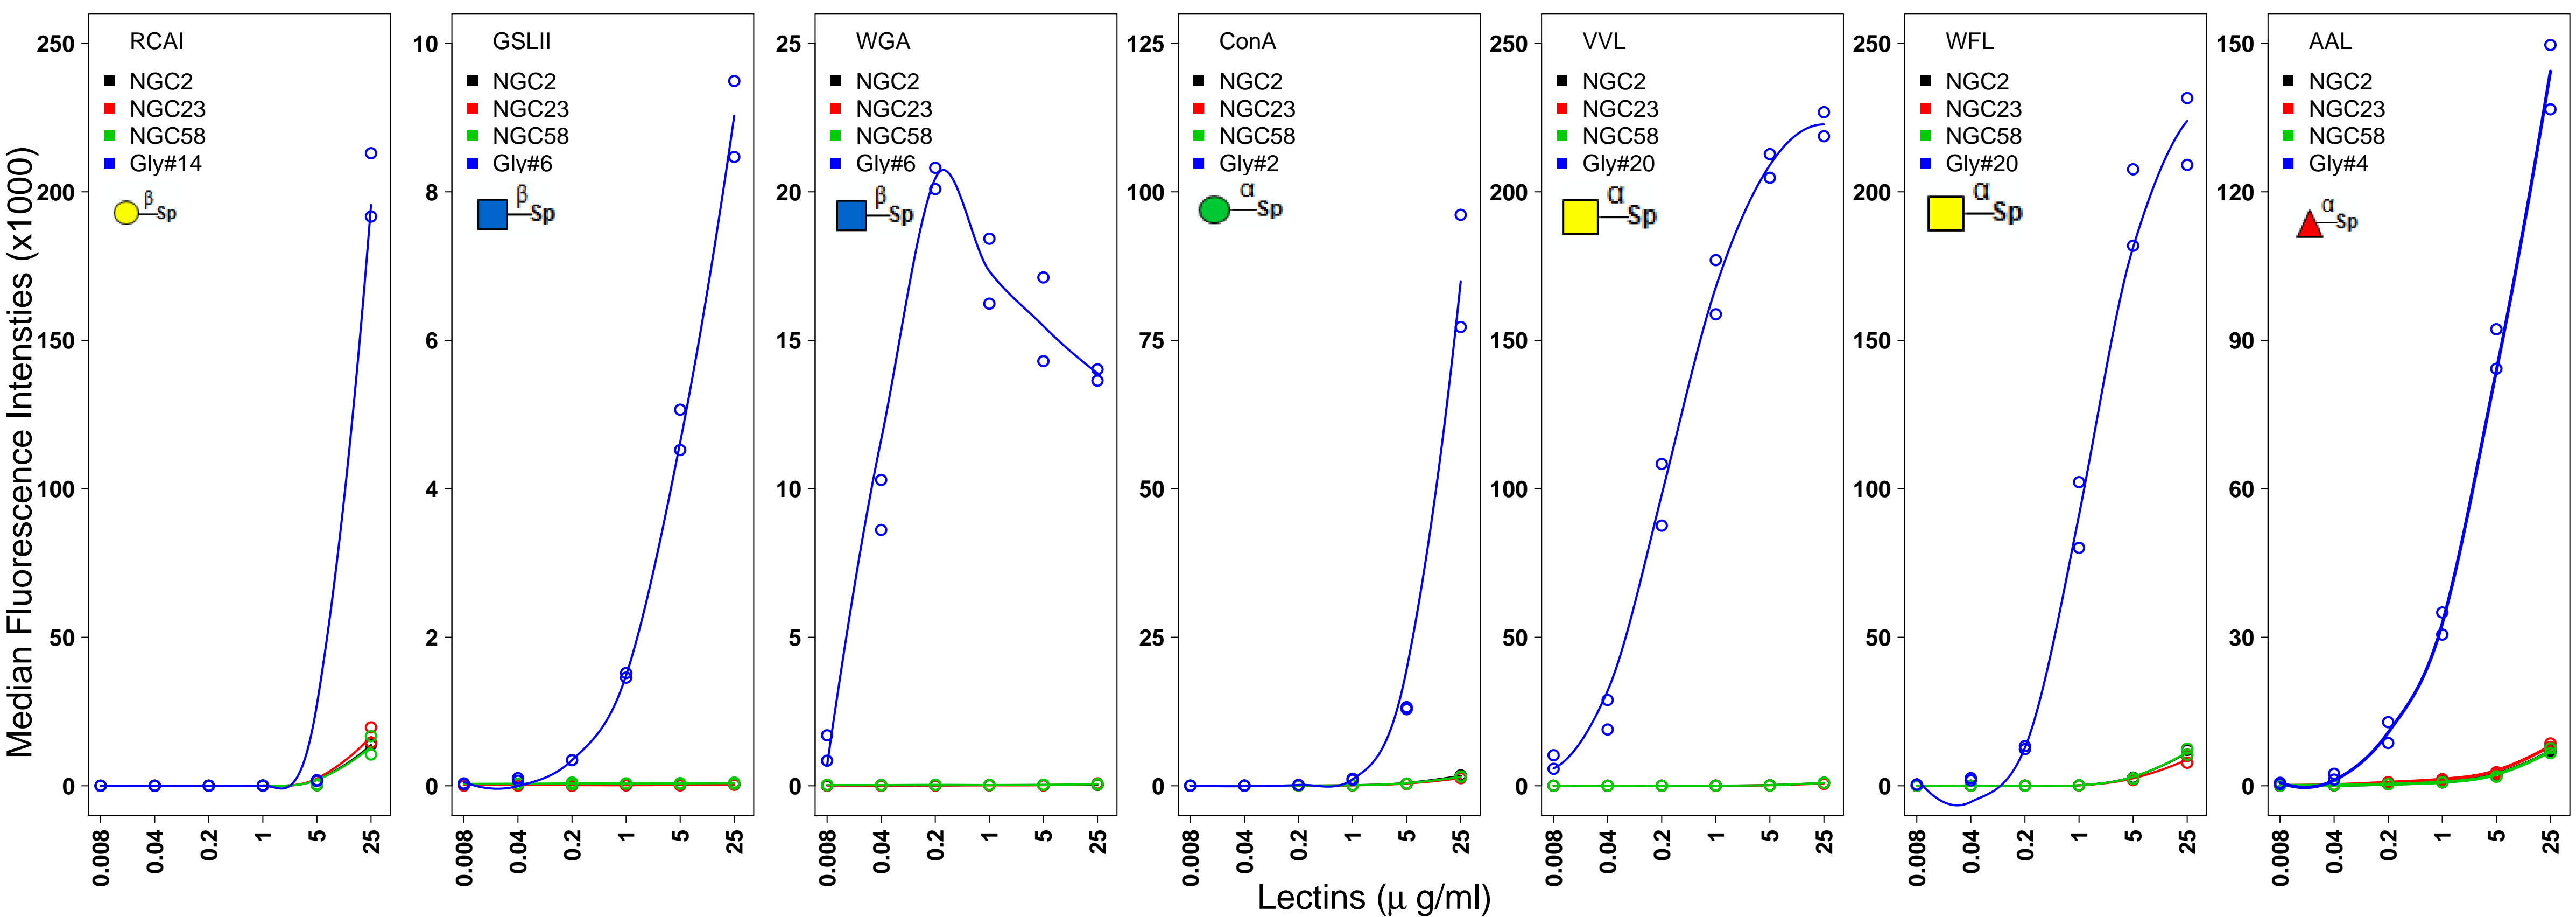

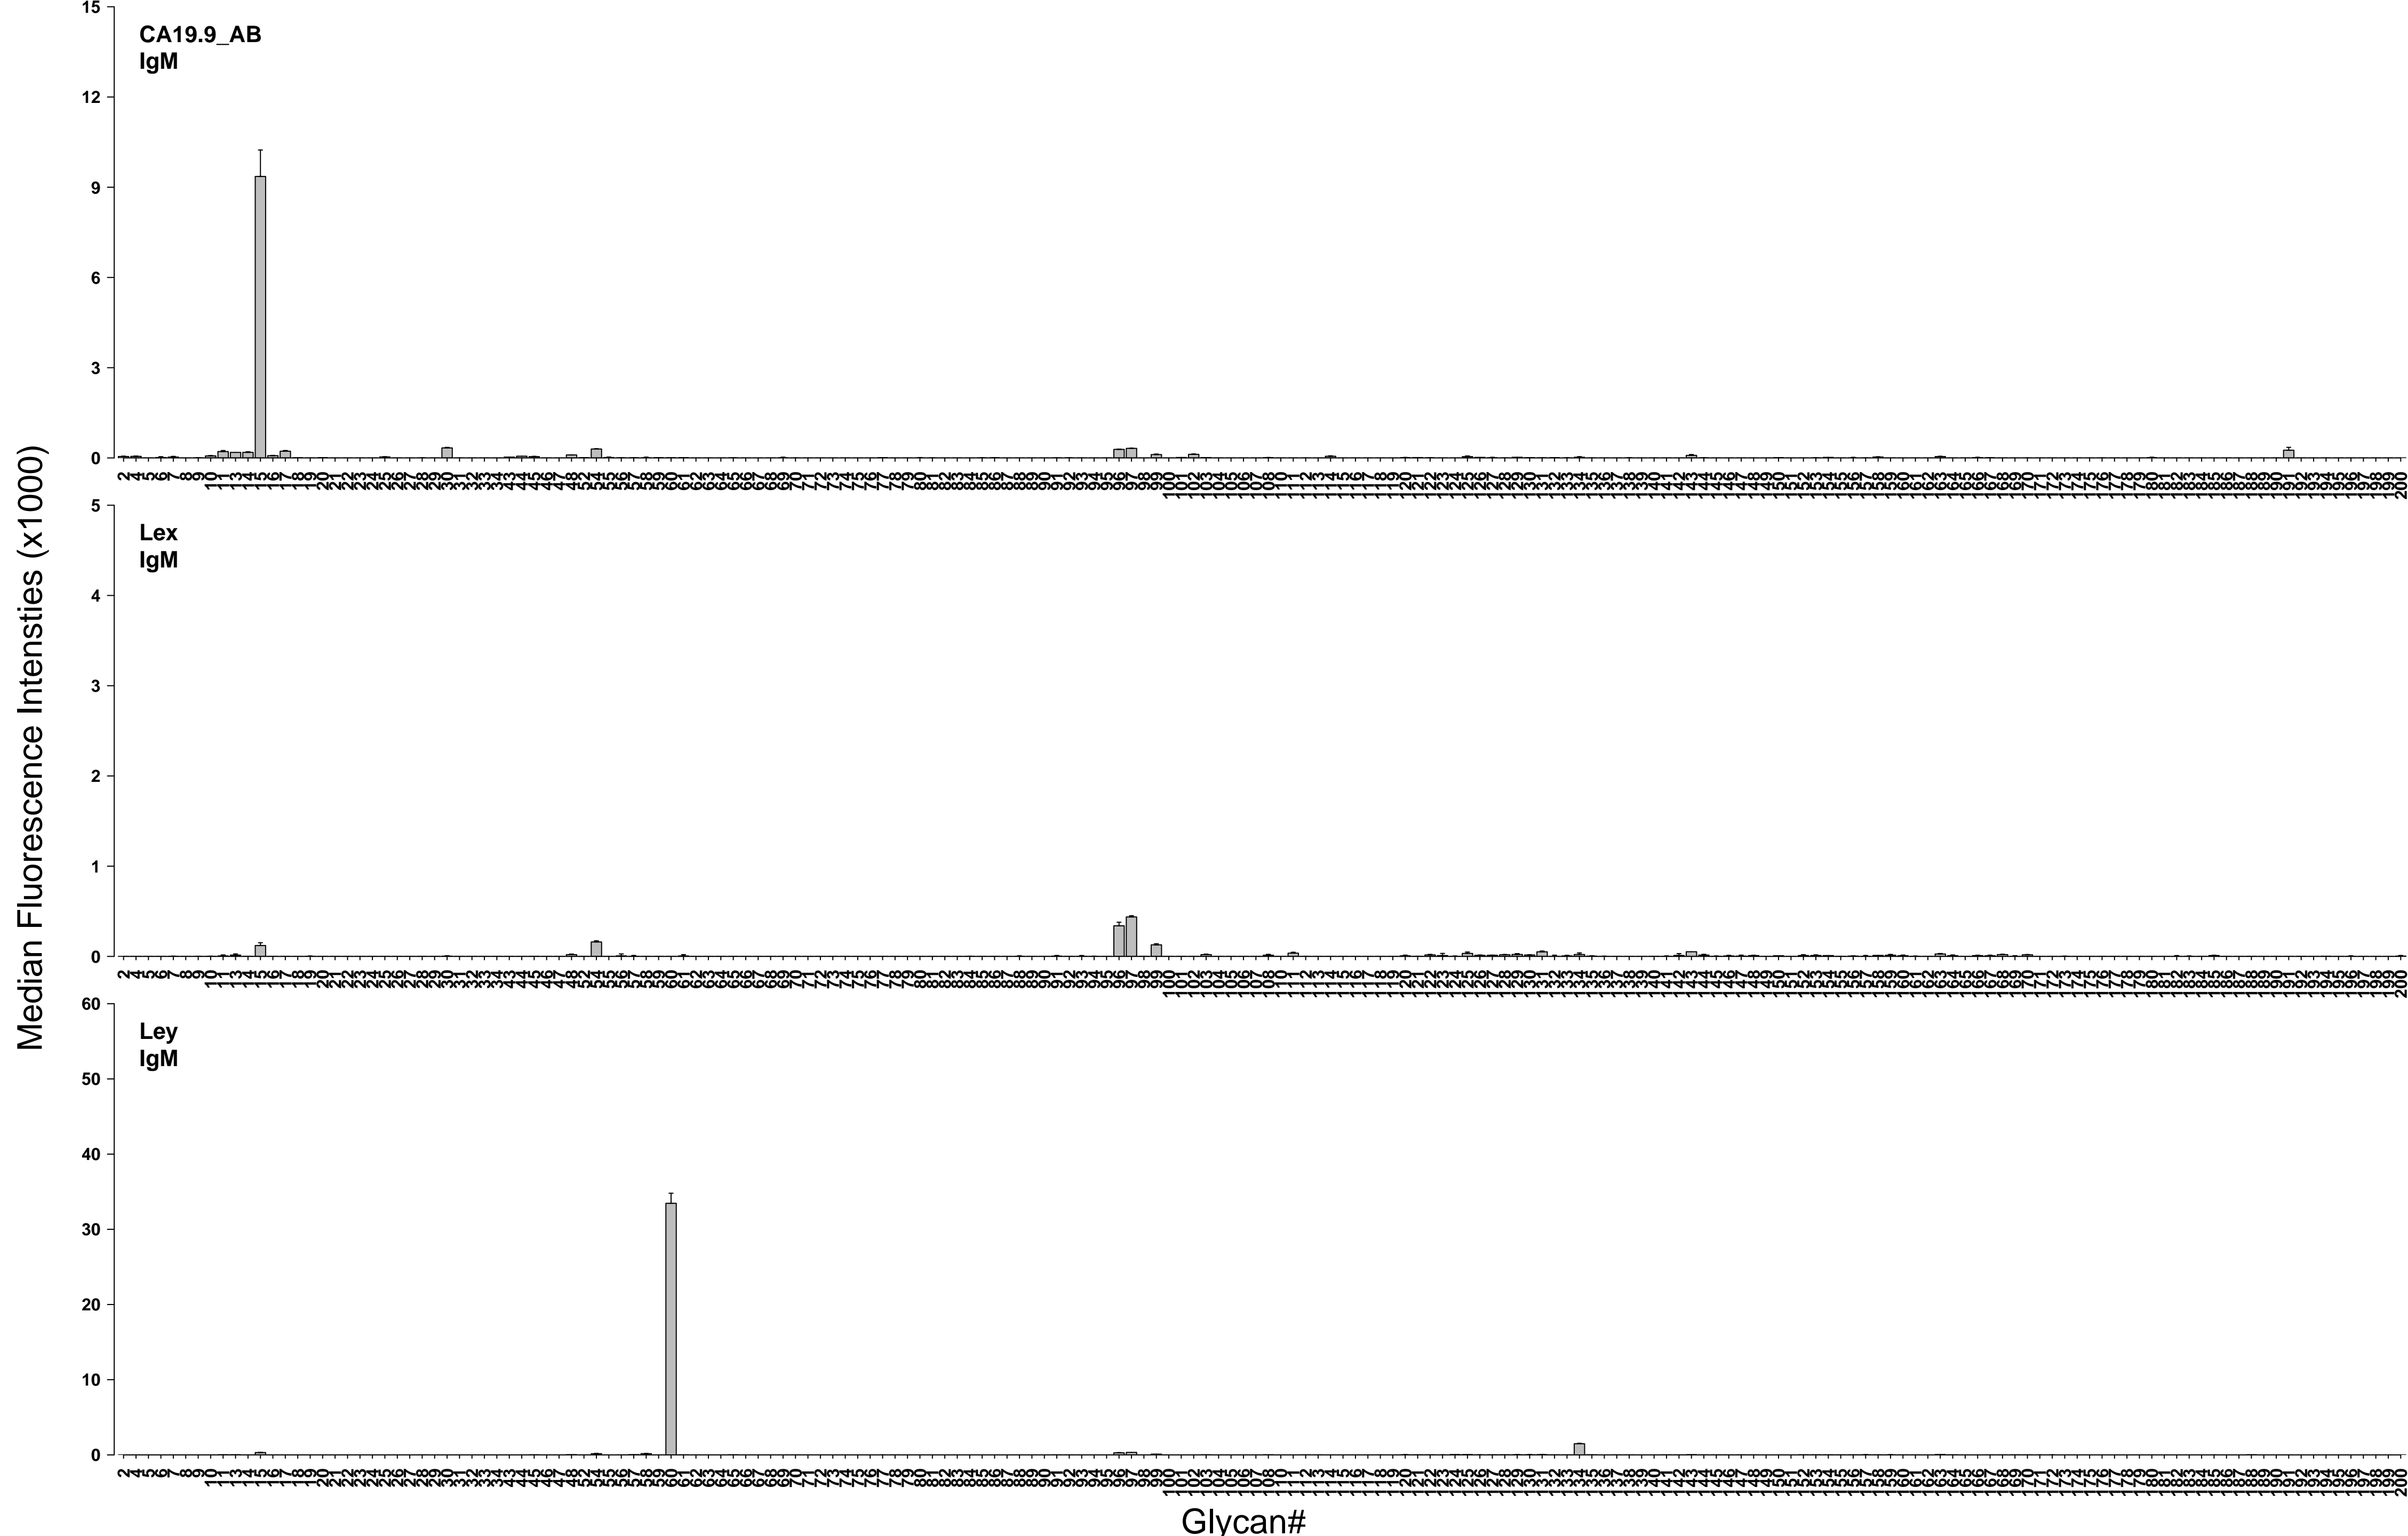

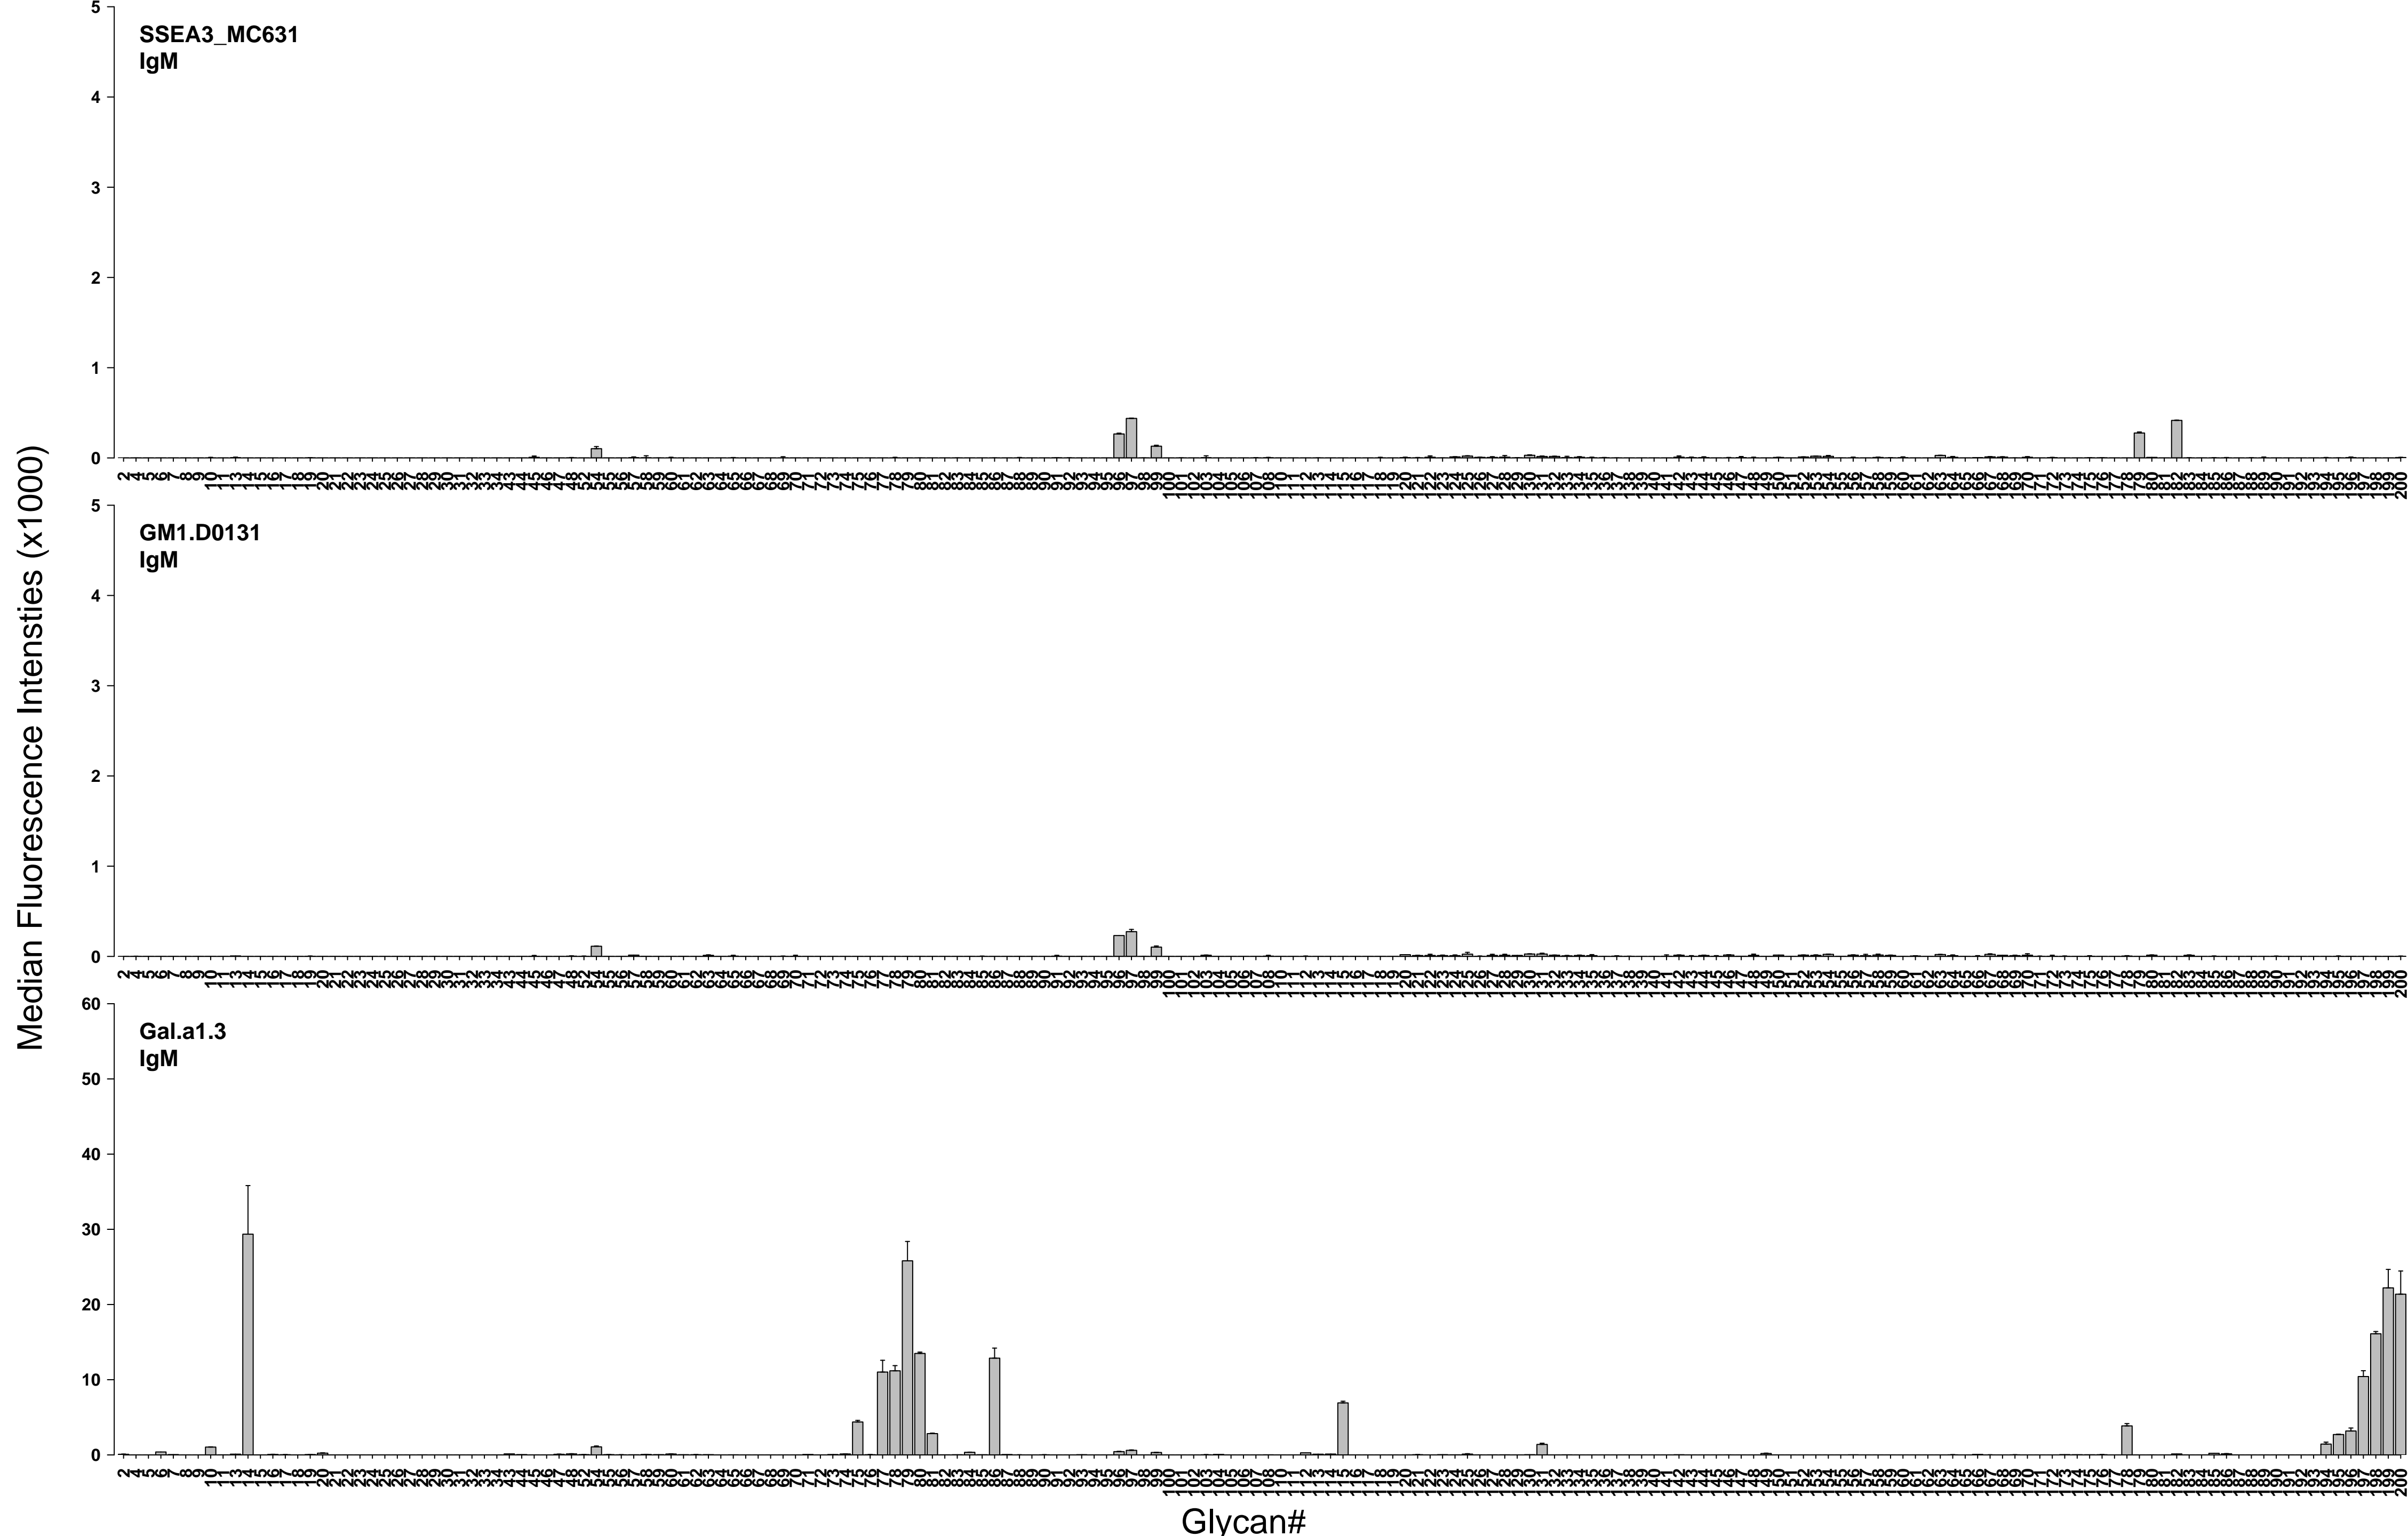



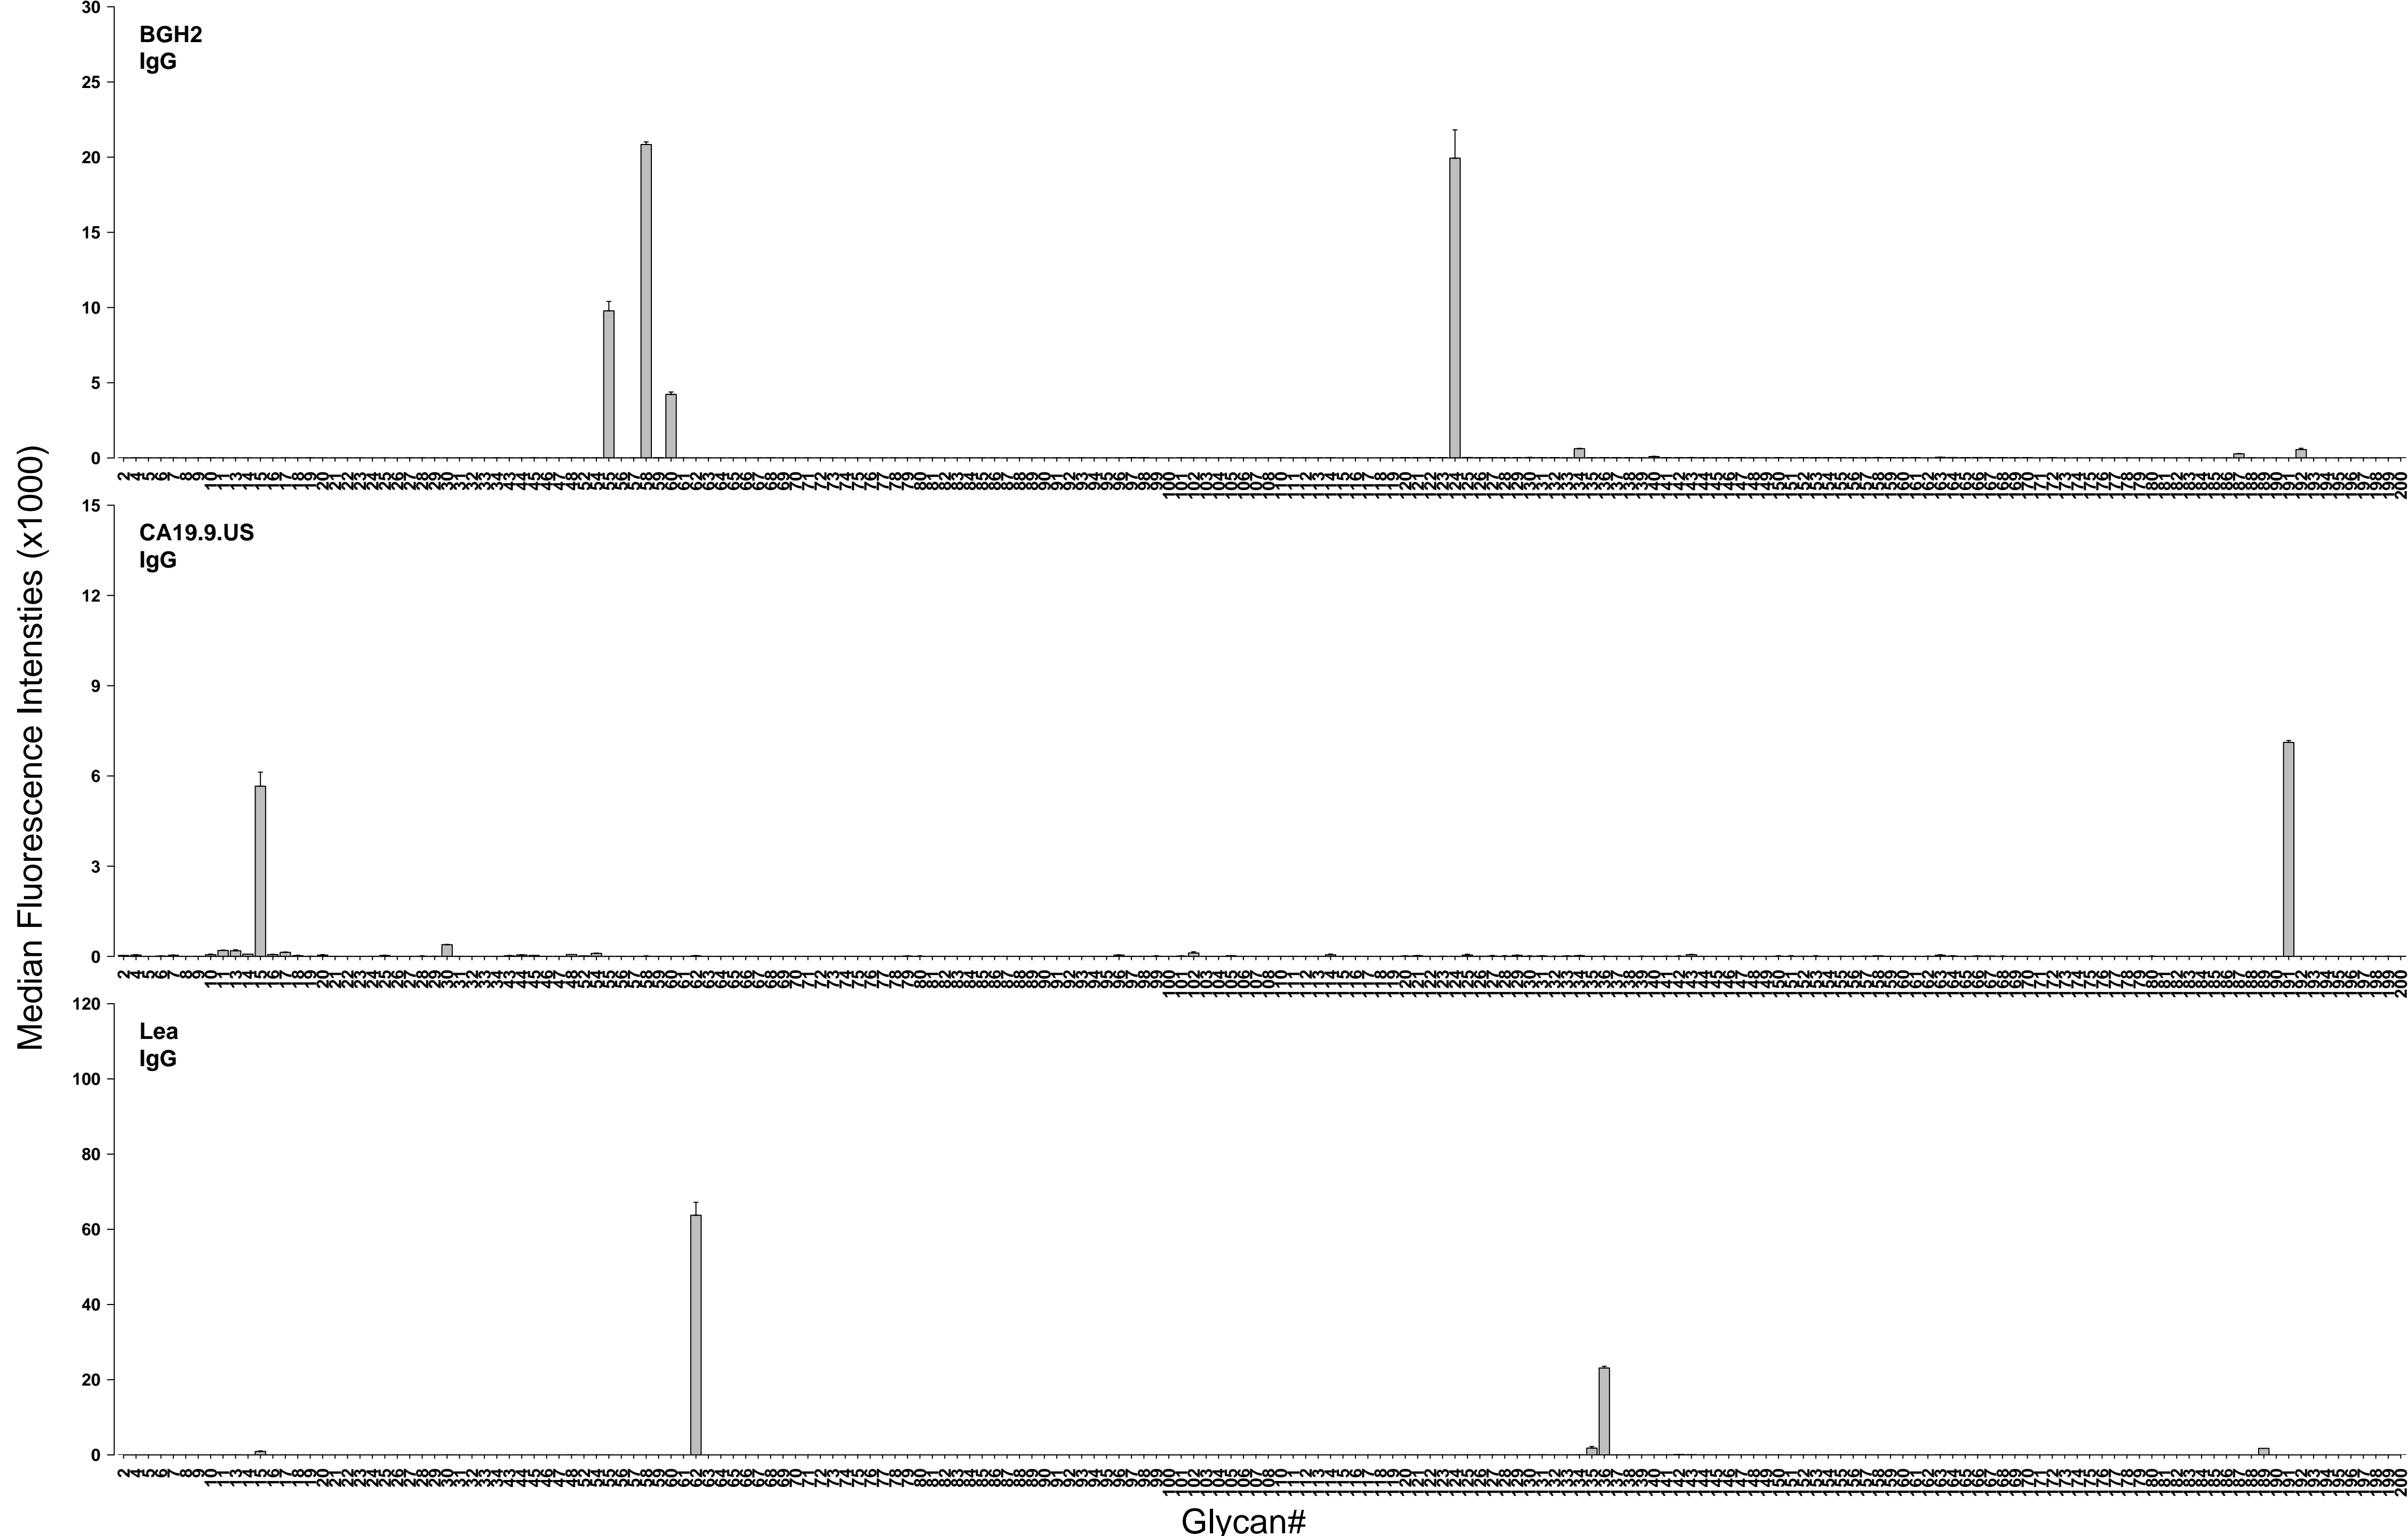





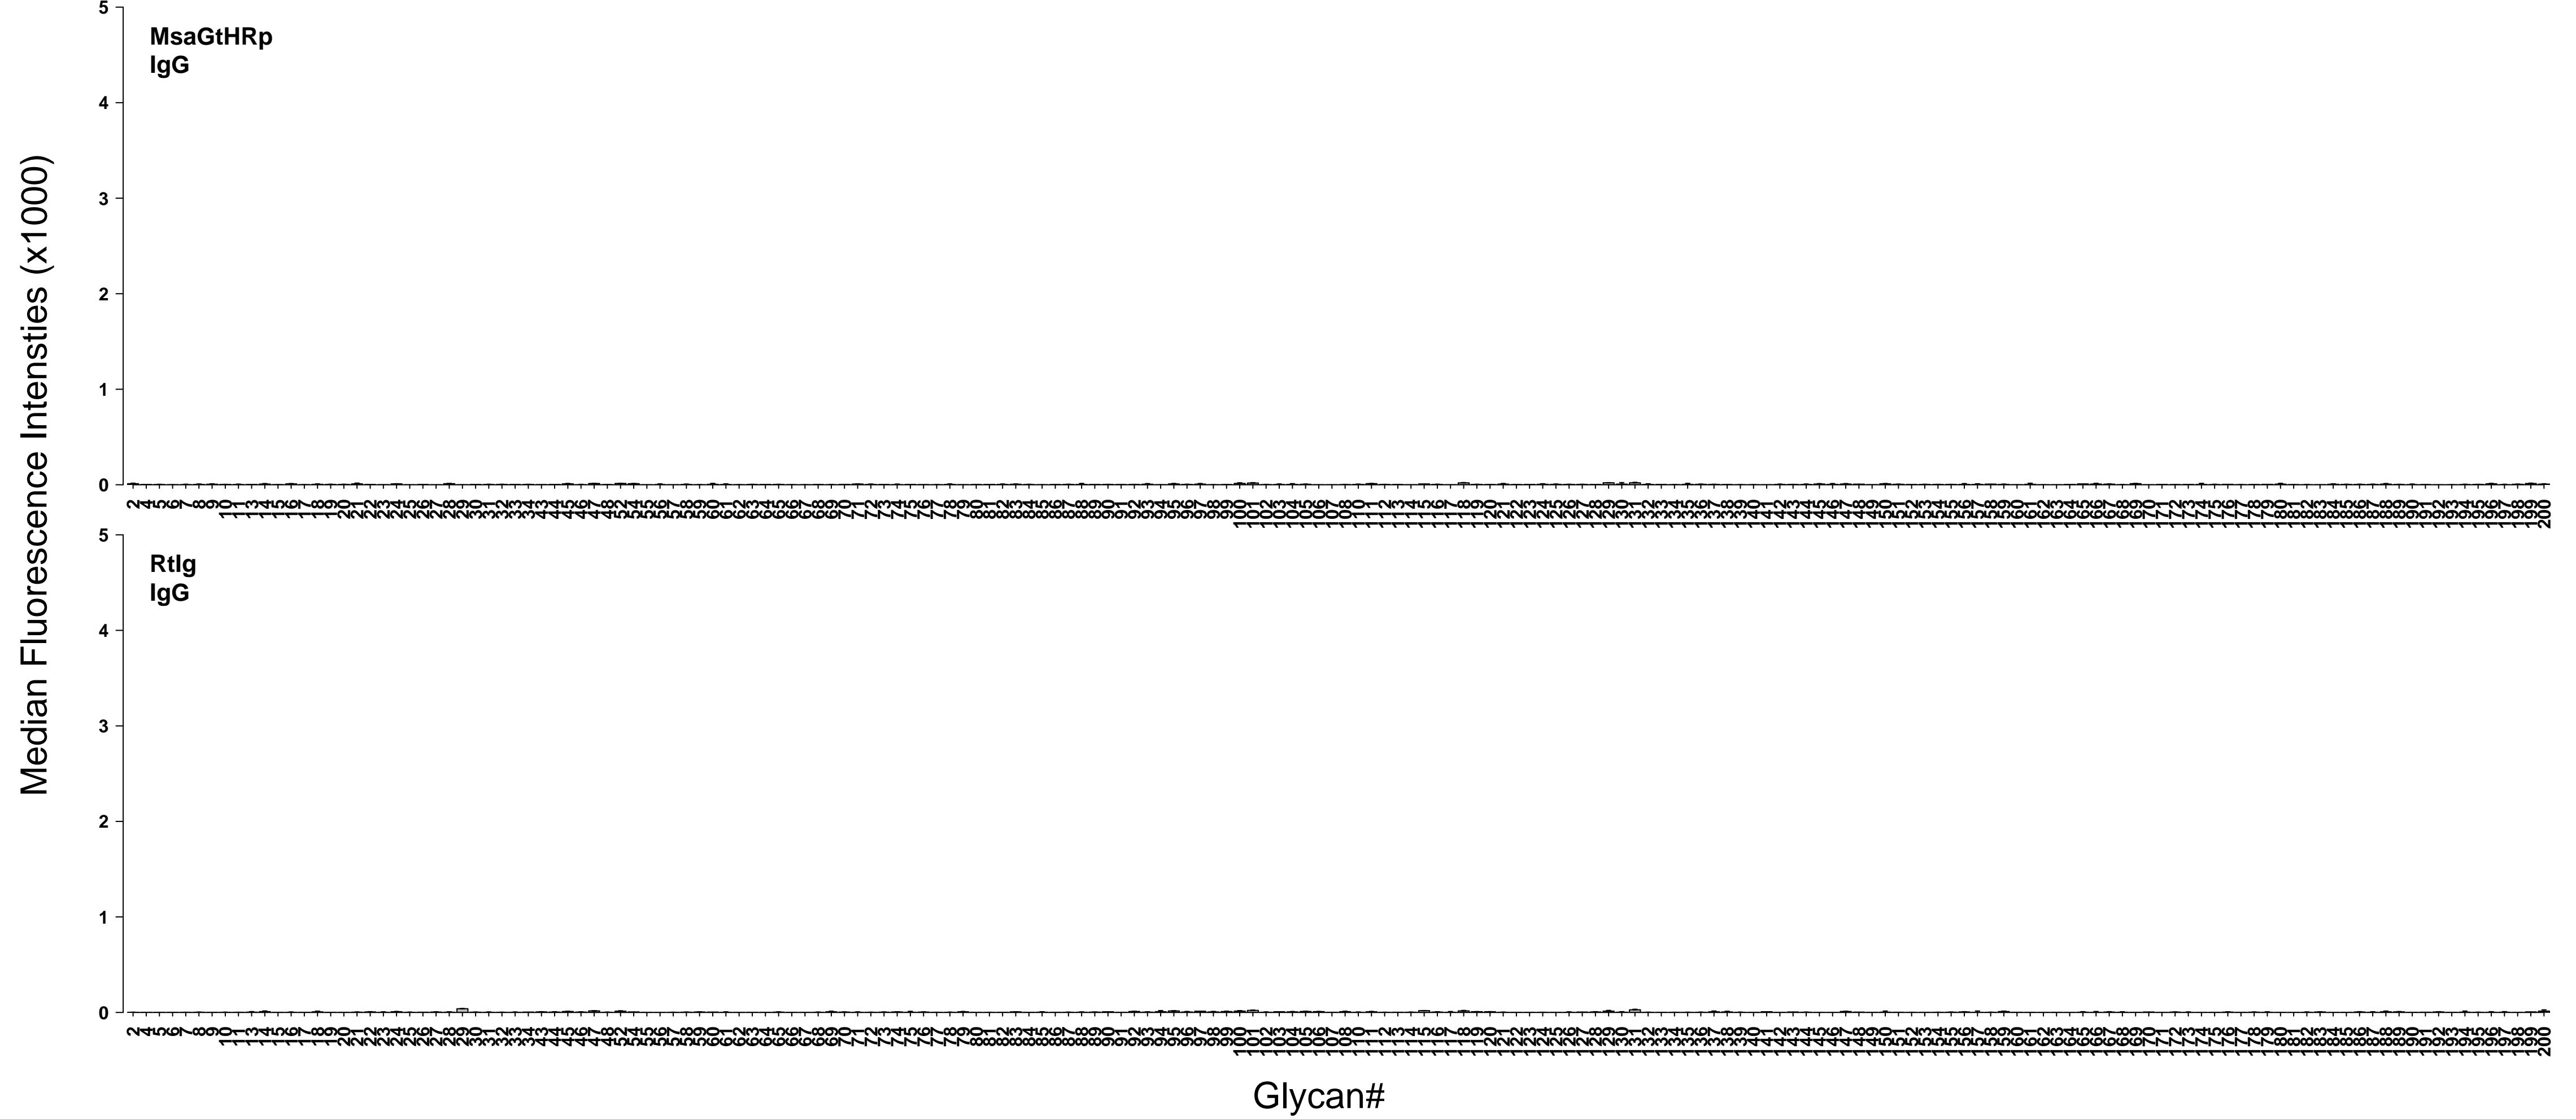

Supplementary Figure 6: Profiling of 13 anti-glycan antibodies on MGBA. Antibodies against proteins that are not known to bind glycans and total IgG from mouse and rat were used as negative controls. The data is presented as mean+SD of two replicates, each experiment was repeated 3 times.

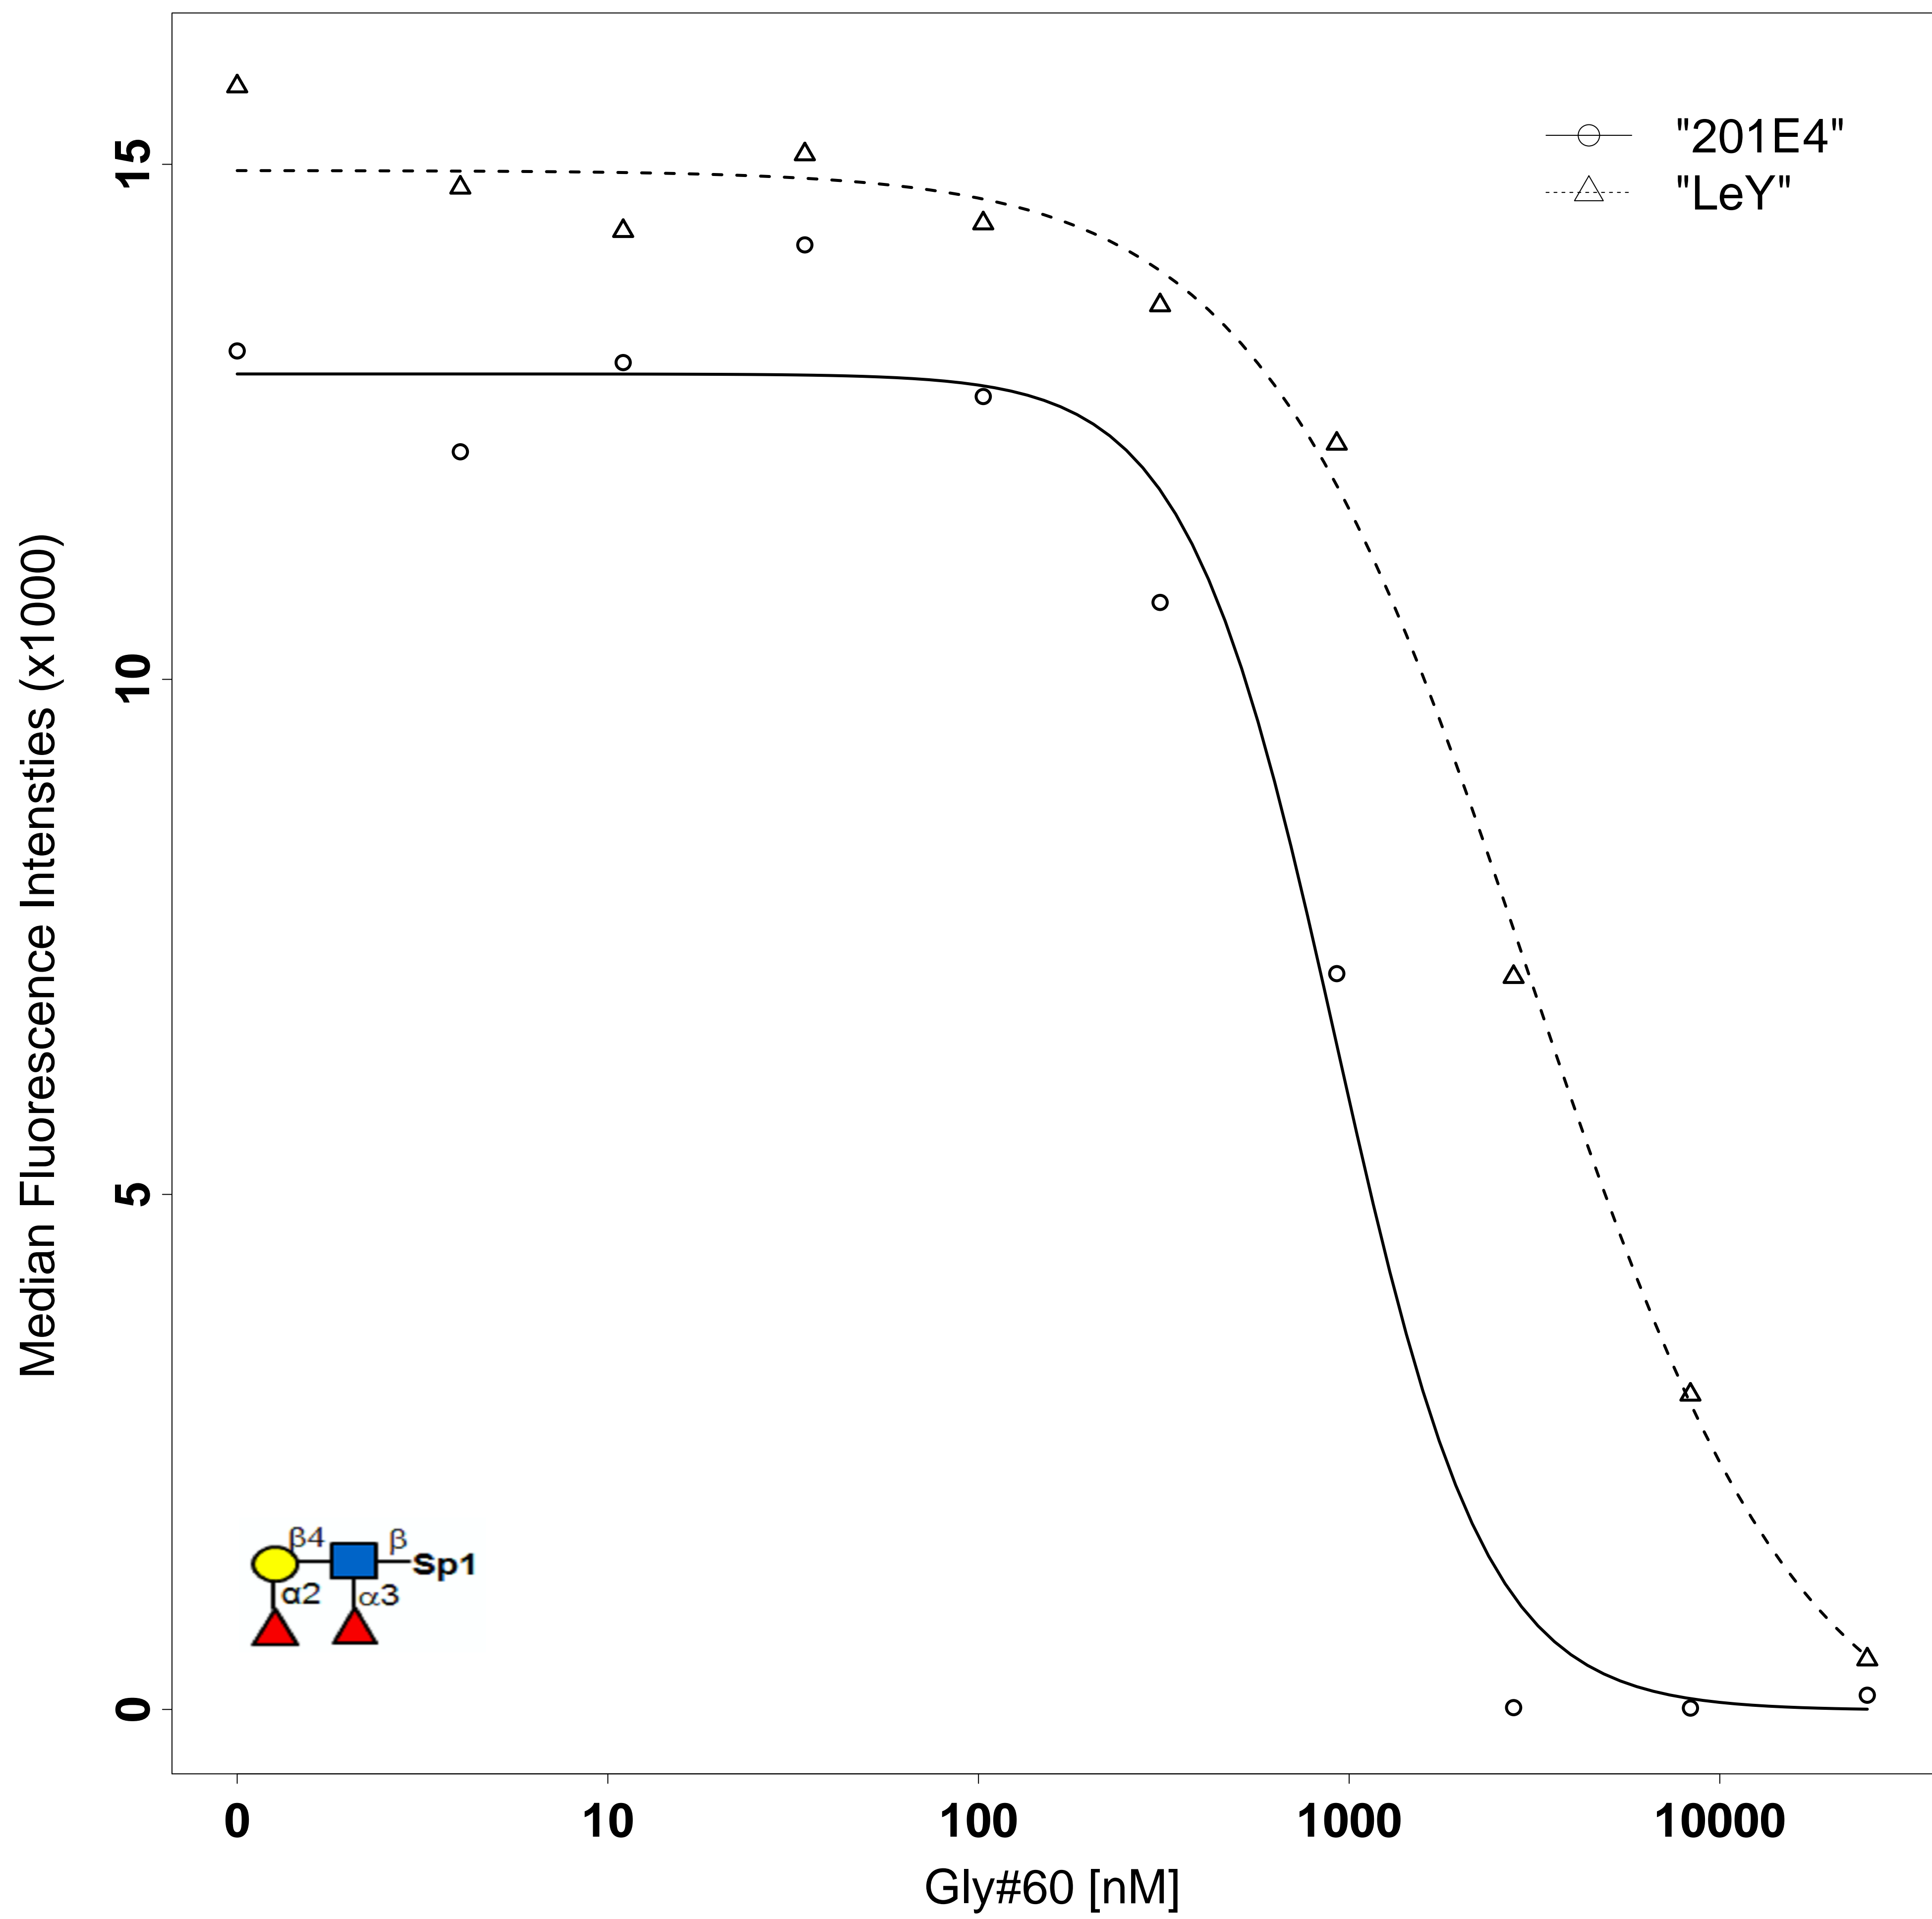

Supplementary Figure 7: Relative affinity determination of IgG and IgM antibodies that can bind Leyby competitive binding assay. Antibody affinity was obtained by determining the IC50. IC50 values for the in lab IgG type antibody (solid line) was 0.92 +/- 0.079  $\mu$ M (mean +/- SD), whereas 3.0 +/- 0.61  $\mu$ M (mean +/- SD) for commercial IgM antibody (dashed line). The LeY structure used for determination of Kd values are presented in inset.

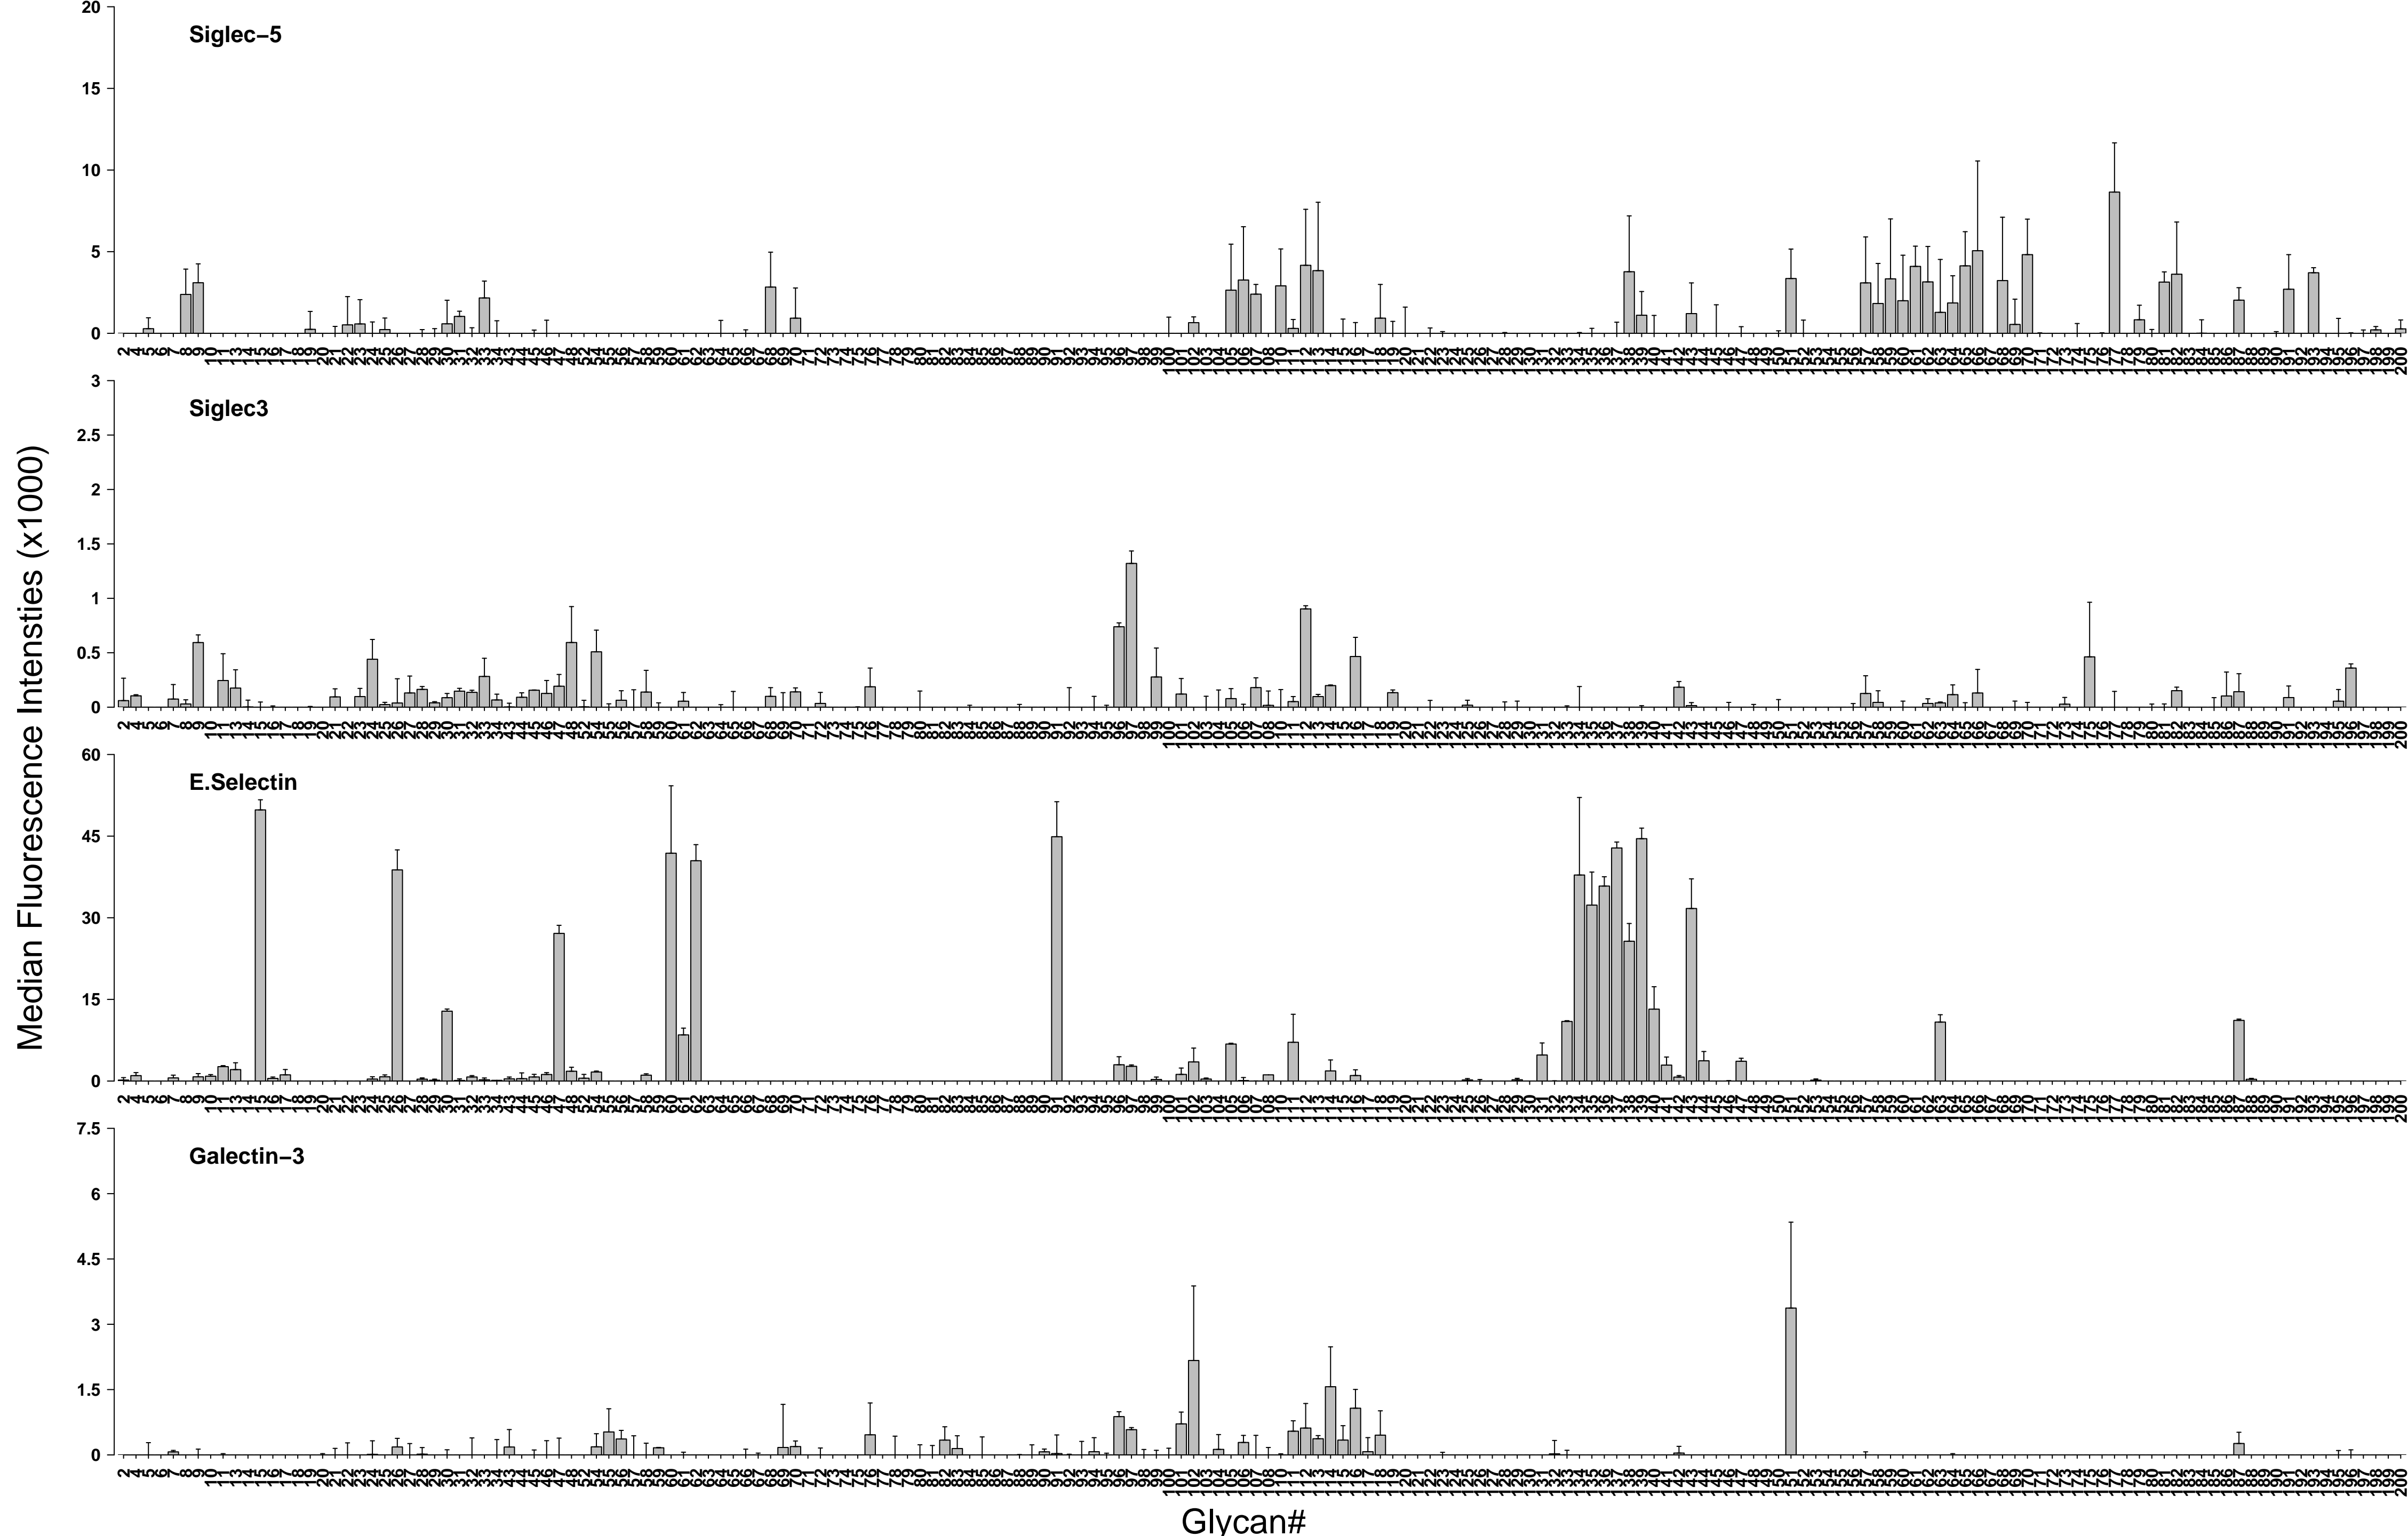

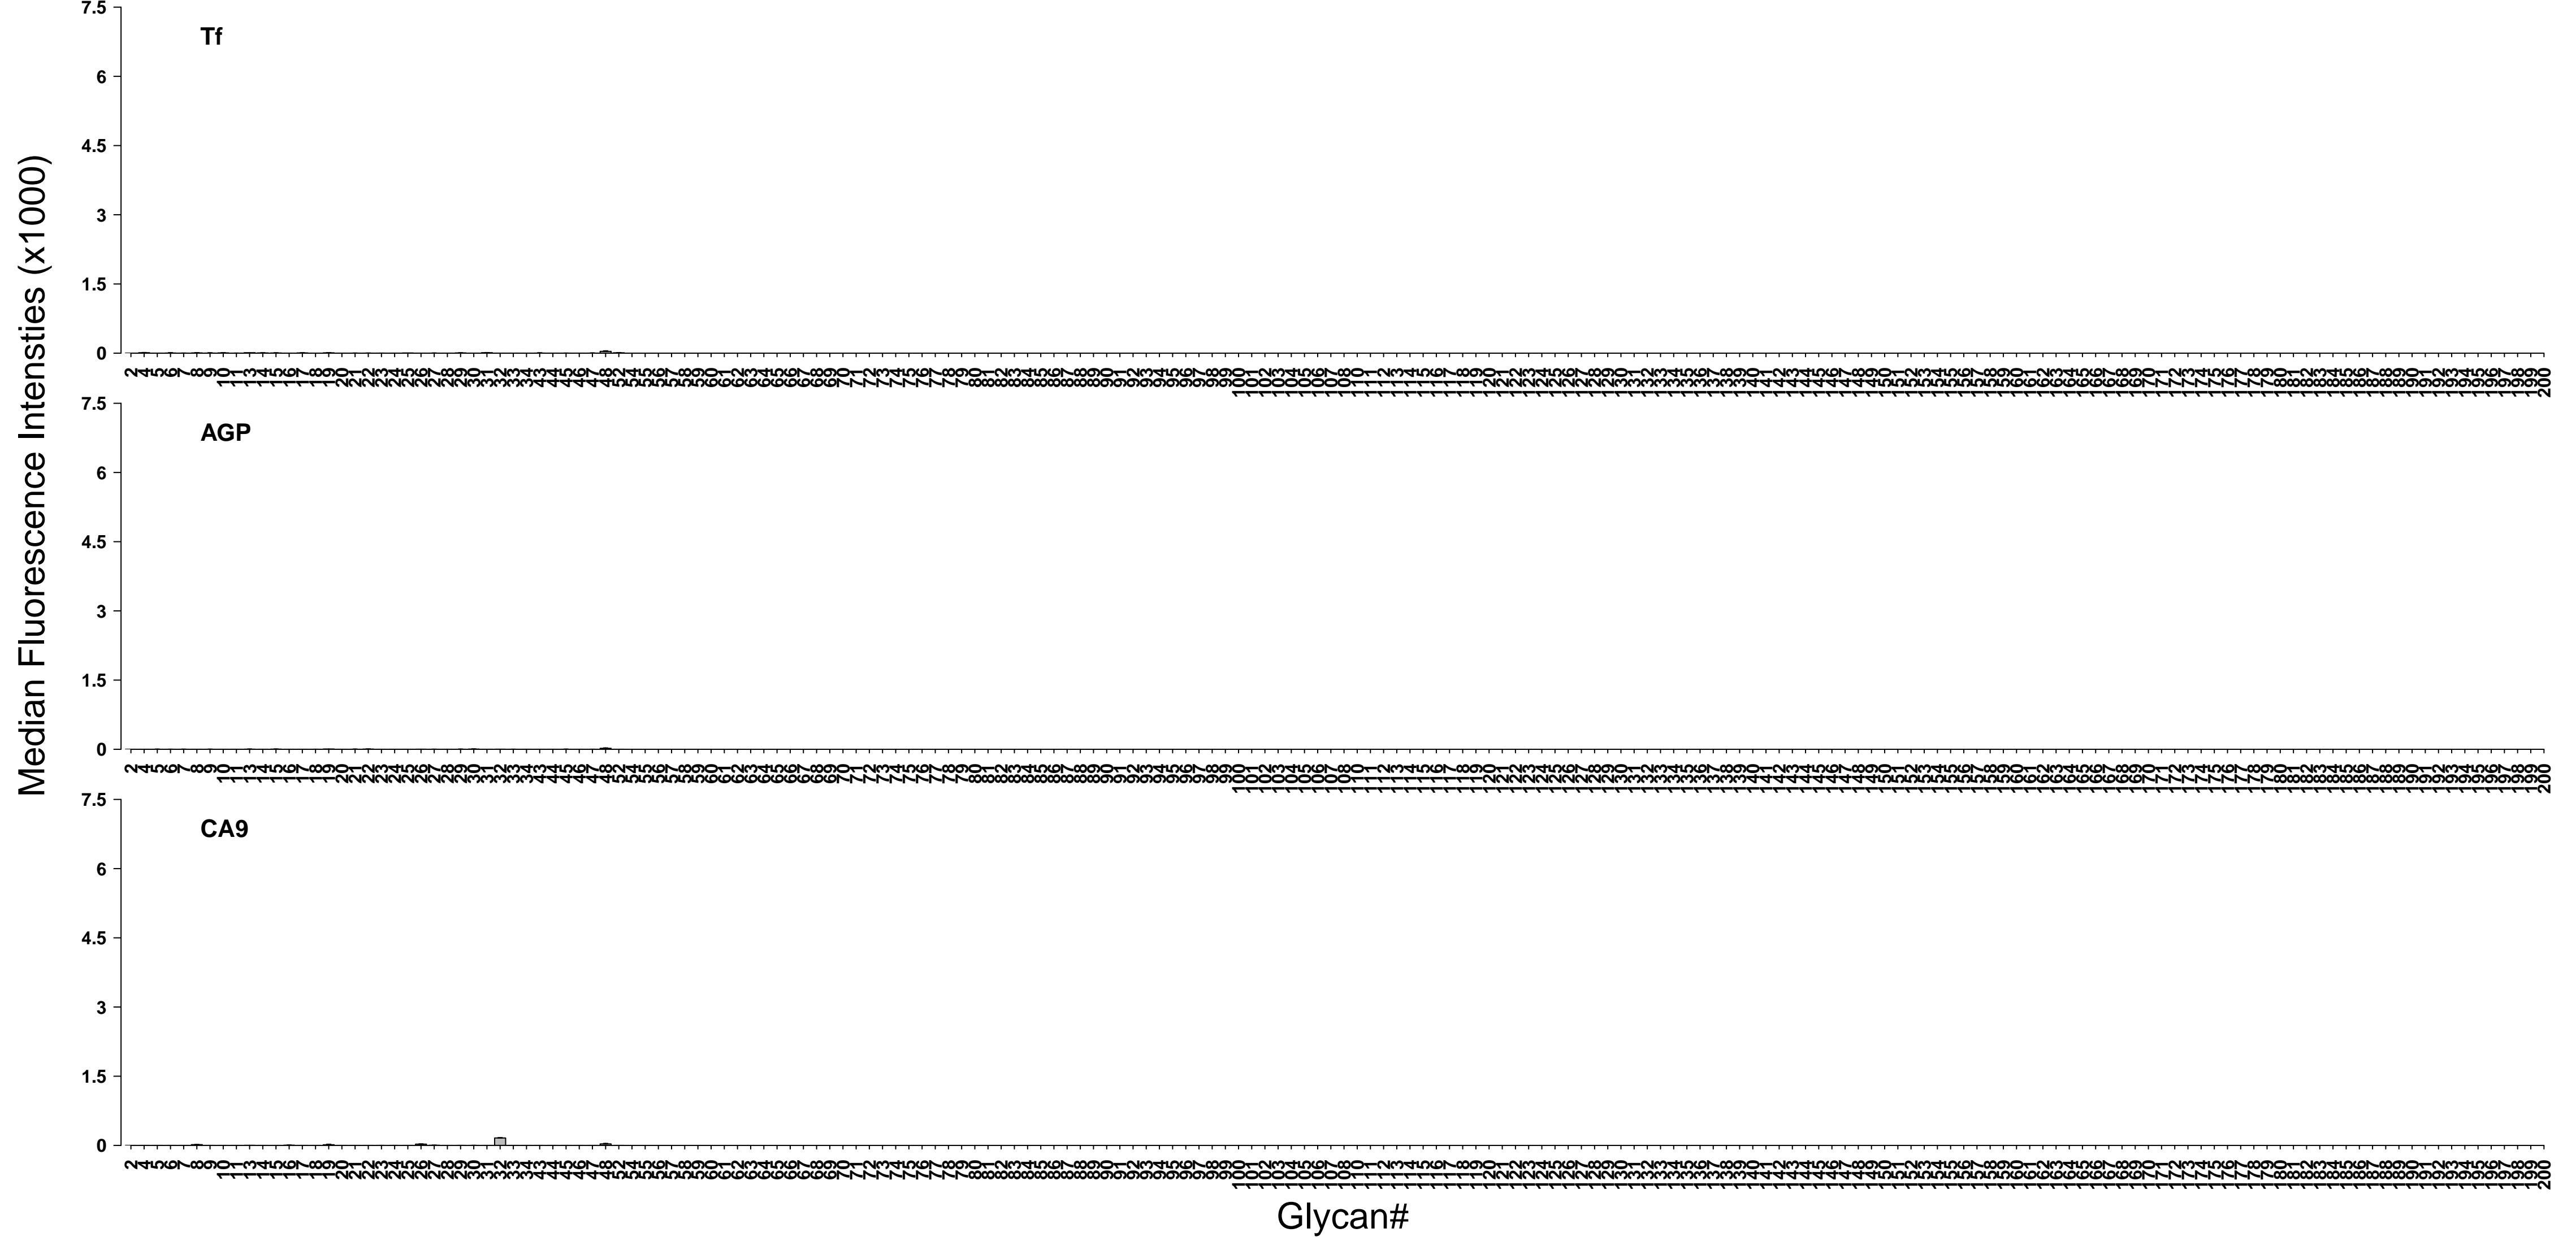

Supplementary Figure 8: Profiling of recombinant glycan binding protein of human (siglec-5, siglec-3 and galectin-3) and murine (E-selectin) origin. Purified serum proteins (Tf-transferrin, AGP- alpha-1 acid glycoprotein) and recombinant CA-9 were added as negative controls. Representative glycan # are added for identification purposes. The data is presented as mean+SD of median fluorescence intensities (y-axis) of two replicates, each experiment was repeated 3 times.

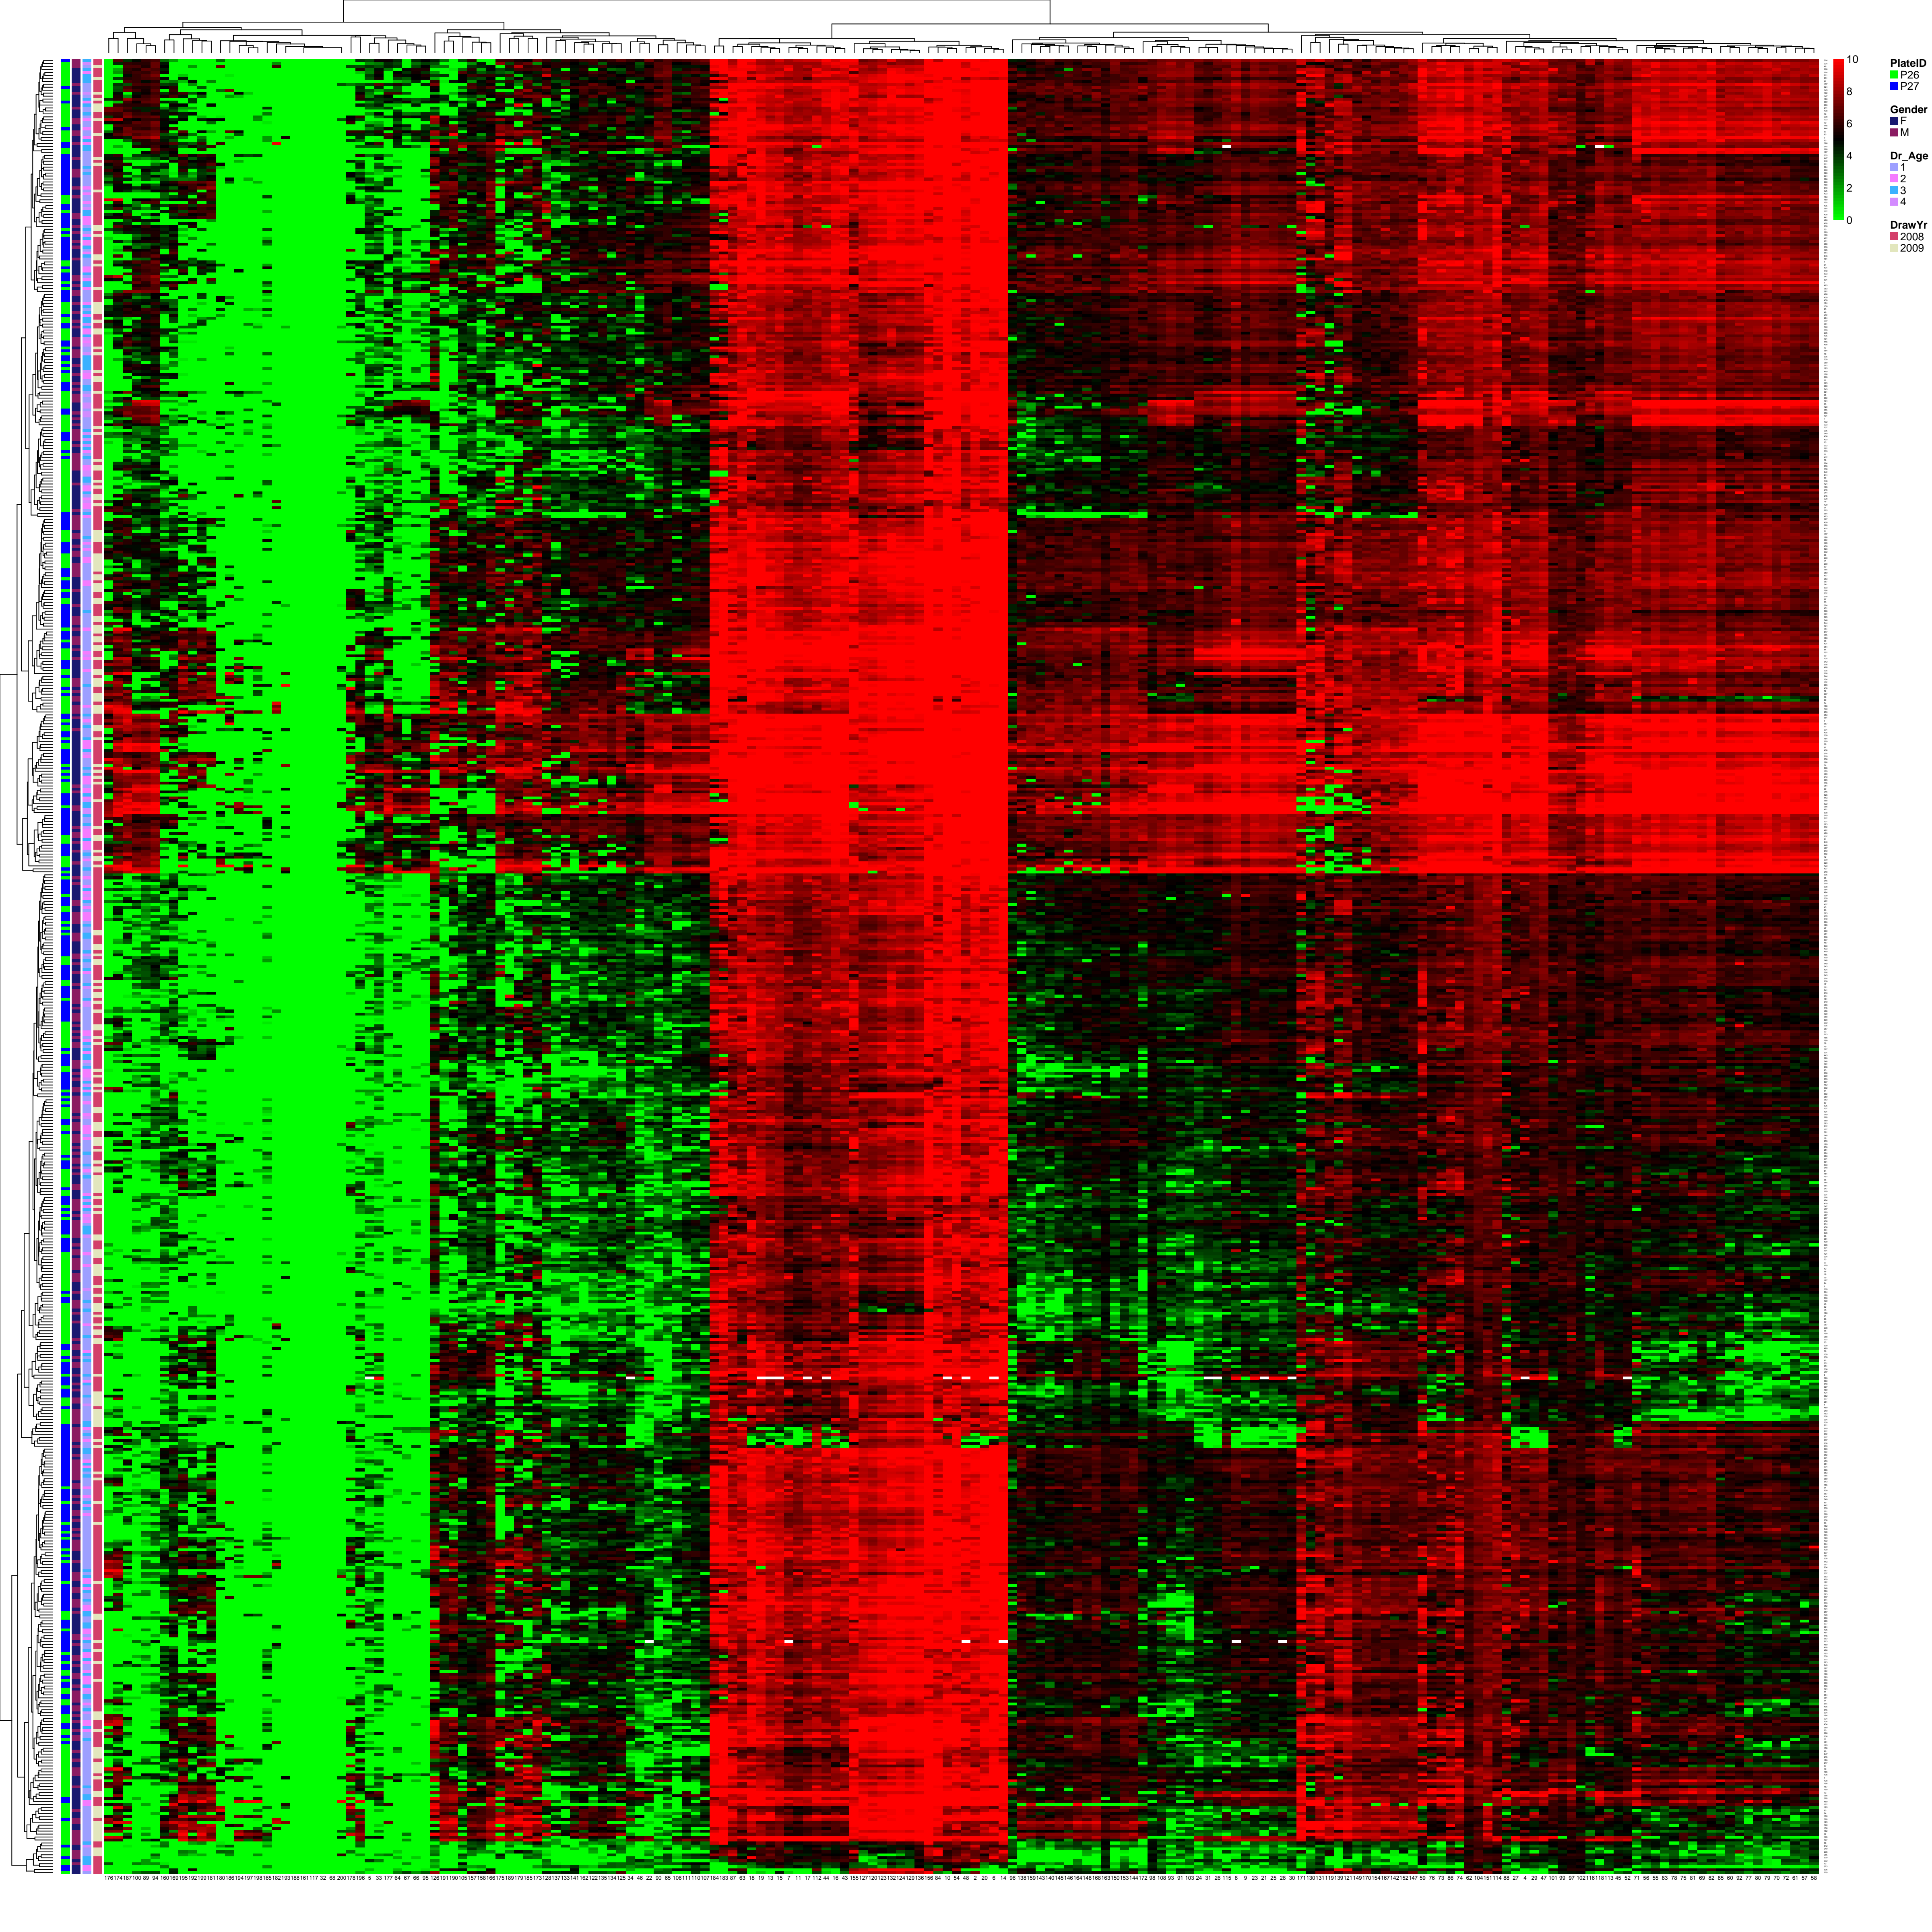

Supplementary Figure 9: Heatmap of anti-IgM antibody levels in 613 samples. Data are Log 2 transformed prior to unsupervised hierarchical clustering. Each row represents an individual sample and each column represents an individual glycan. IgM levels are represented by the color codes as indicated by the color bar. Serum IgM levels was used to cluster glycans (Cluster 1 – 5) as well as subjects (Cluster A – D). Cluster A, B, C and D contain 221 (36%), 54 (8.8%), 325 (53.1%), and 13 (2.1%) subjects, respectively (presented in Figure 5b). The sample clusters are not associated with demographic or clinical variables such as collection date, gender and age of the subjects, and batch of sample analyses.

Median Fluorescence Intensities (x1000)

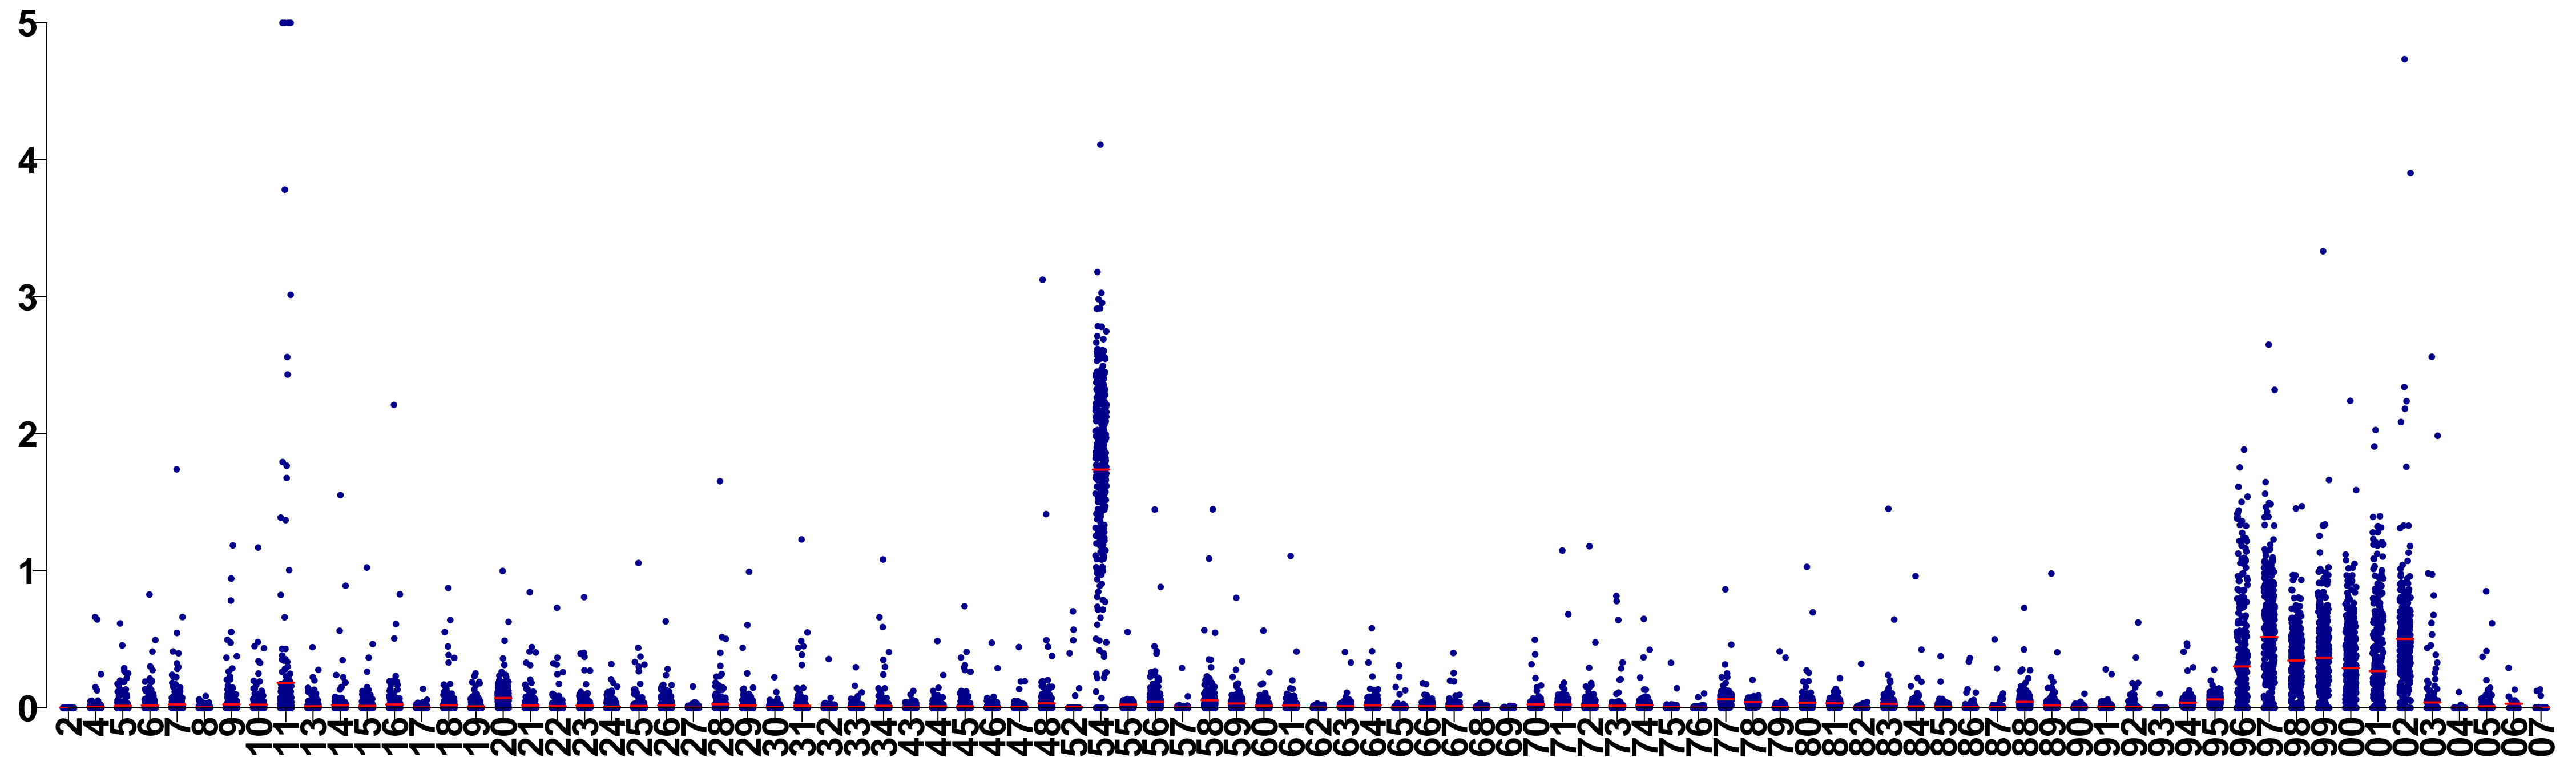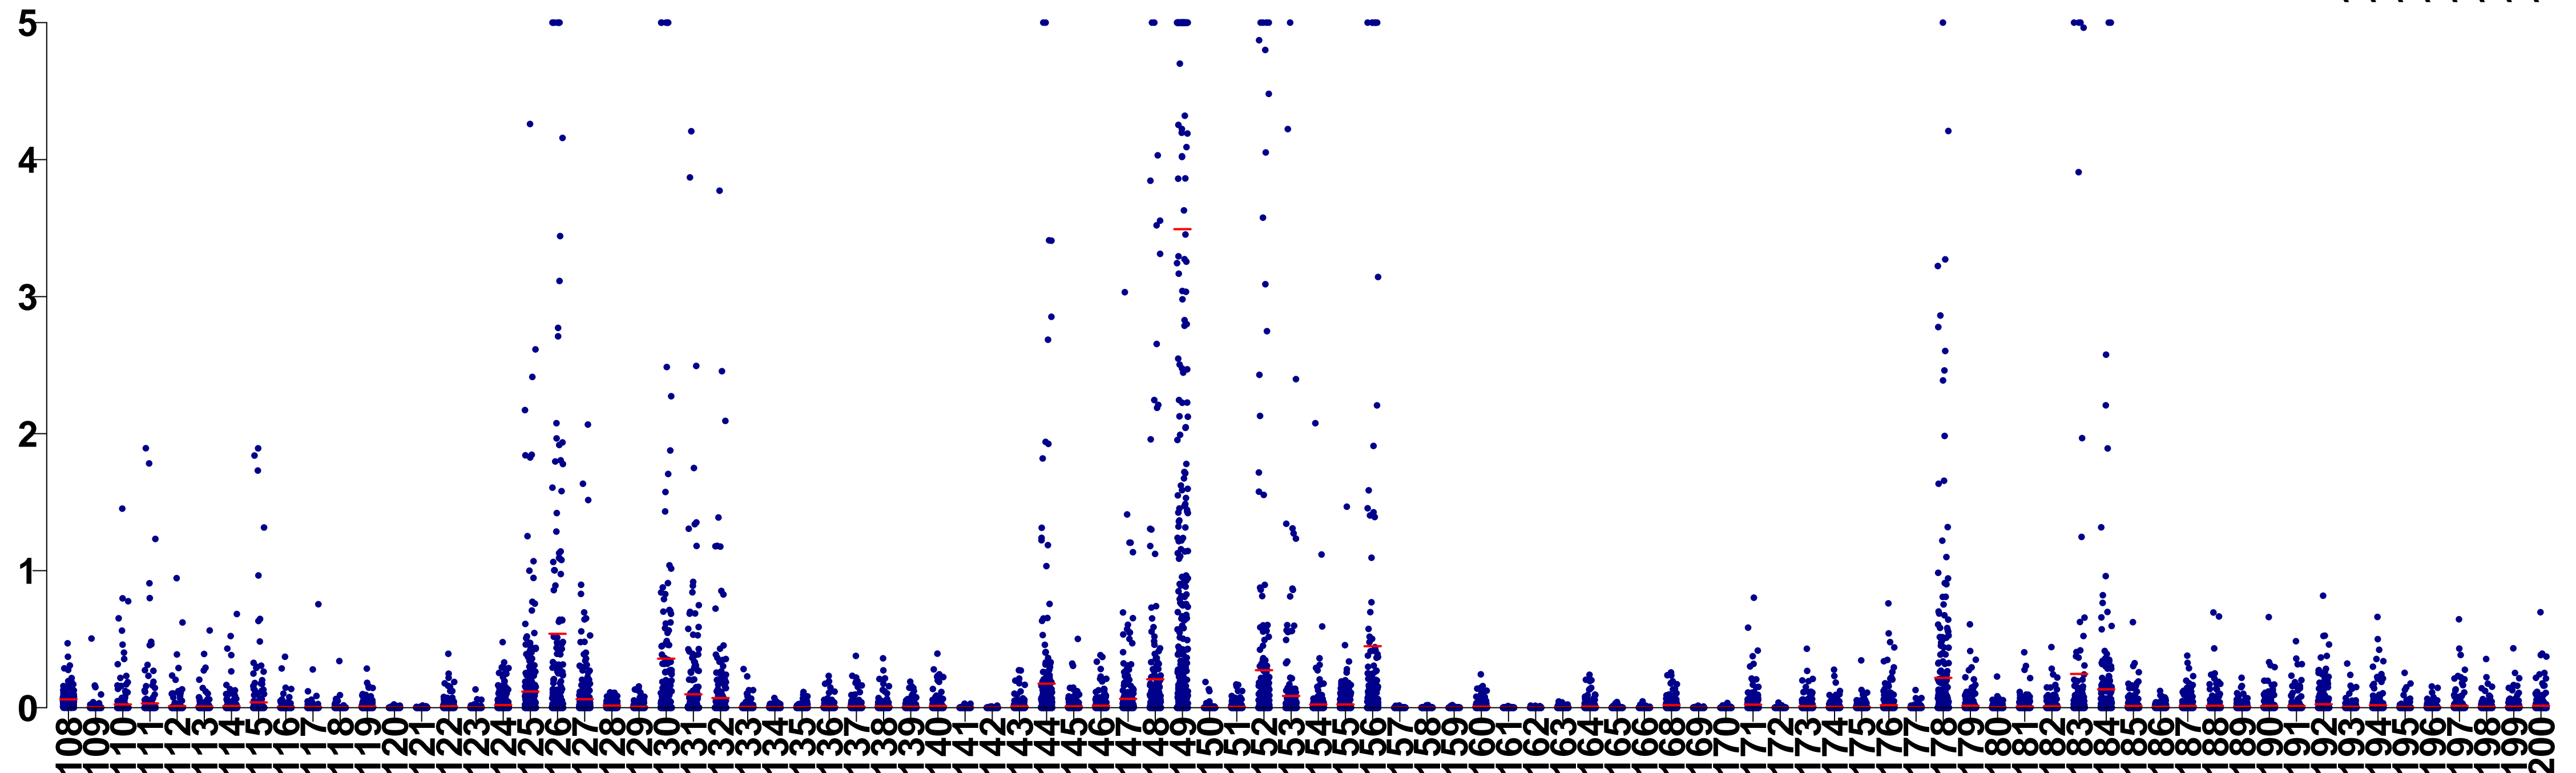

Glycan#

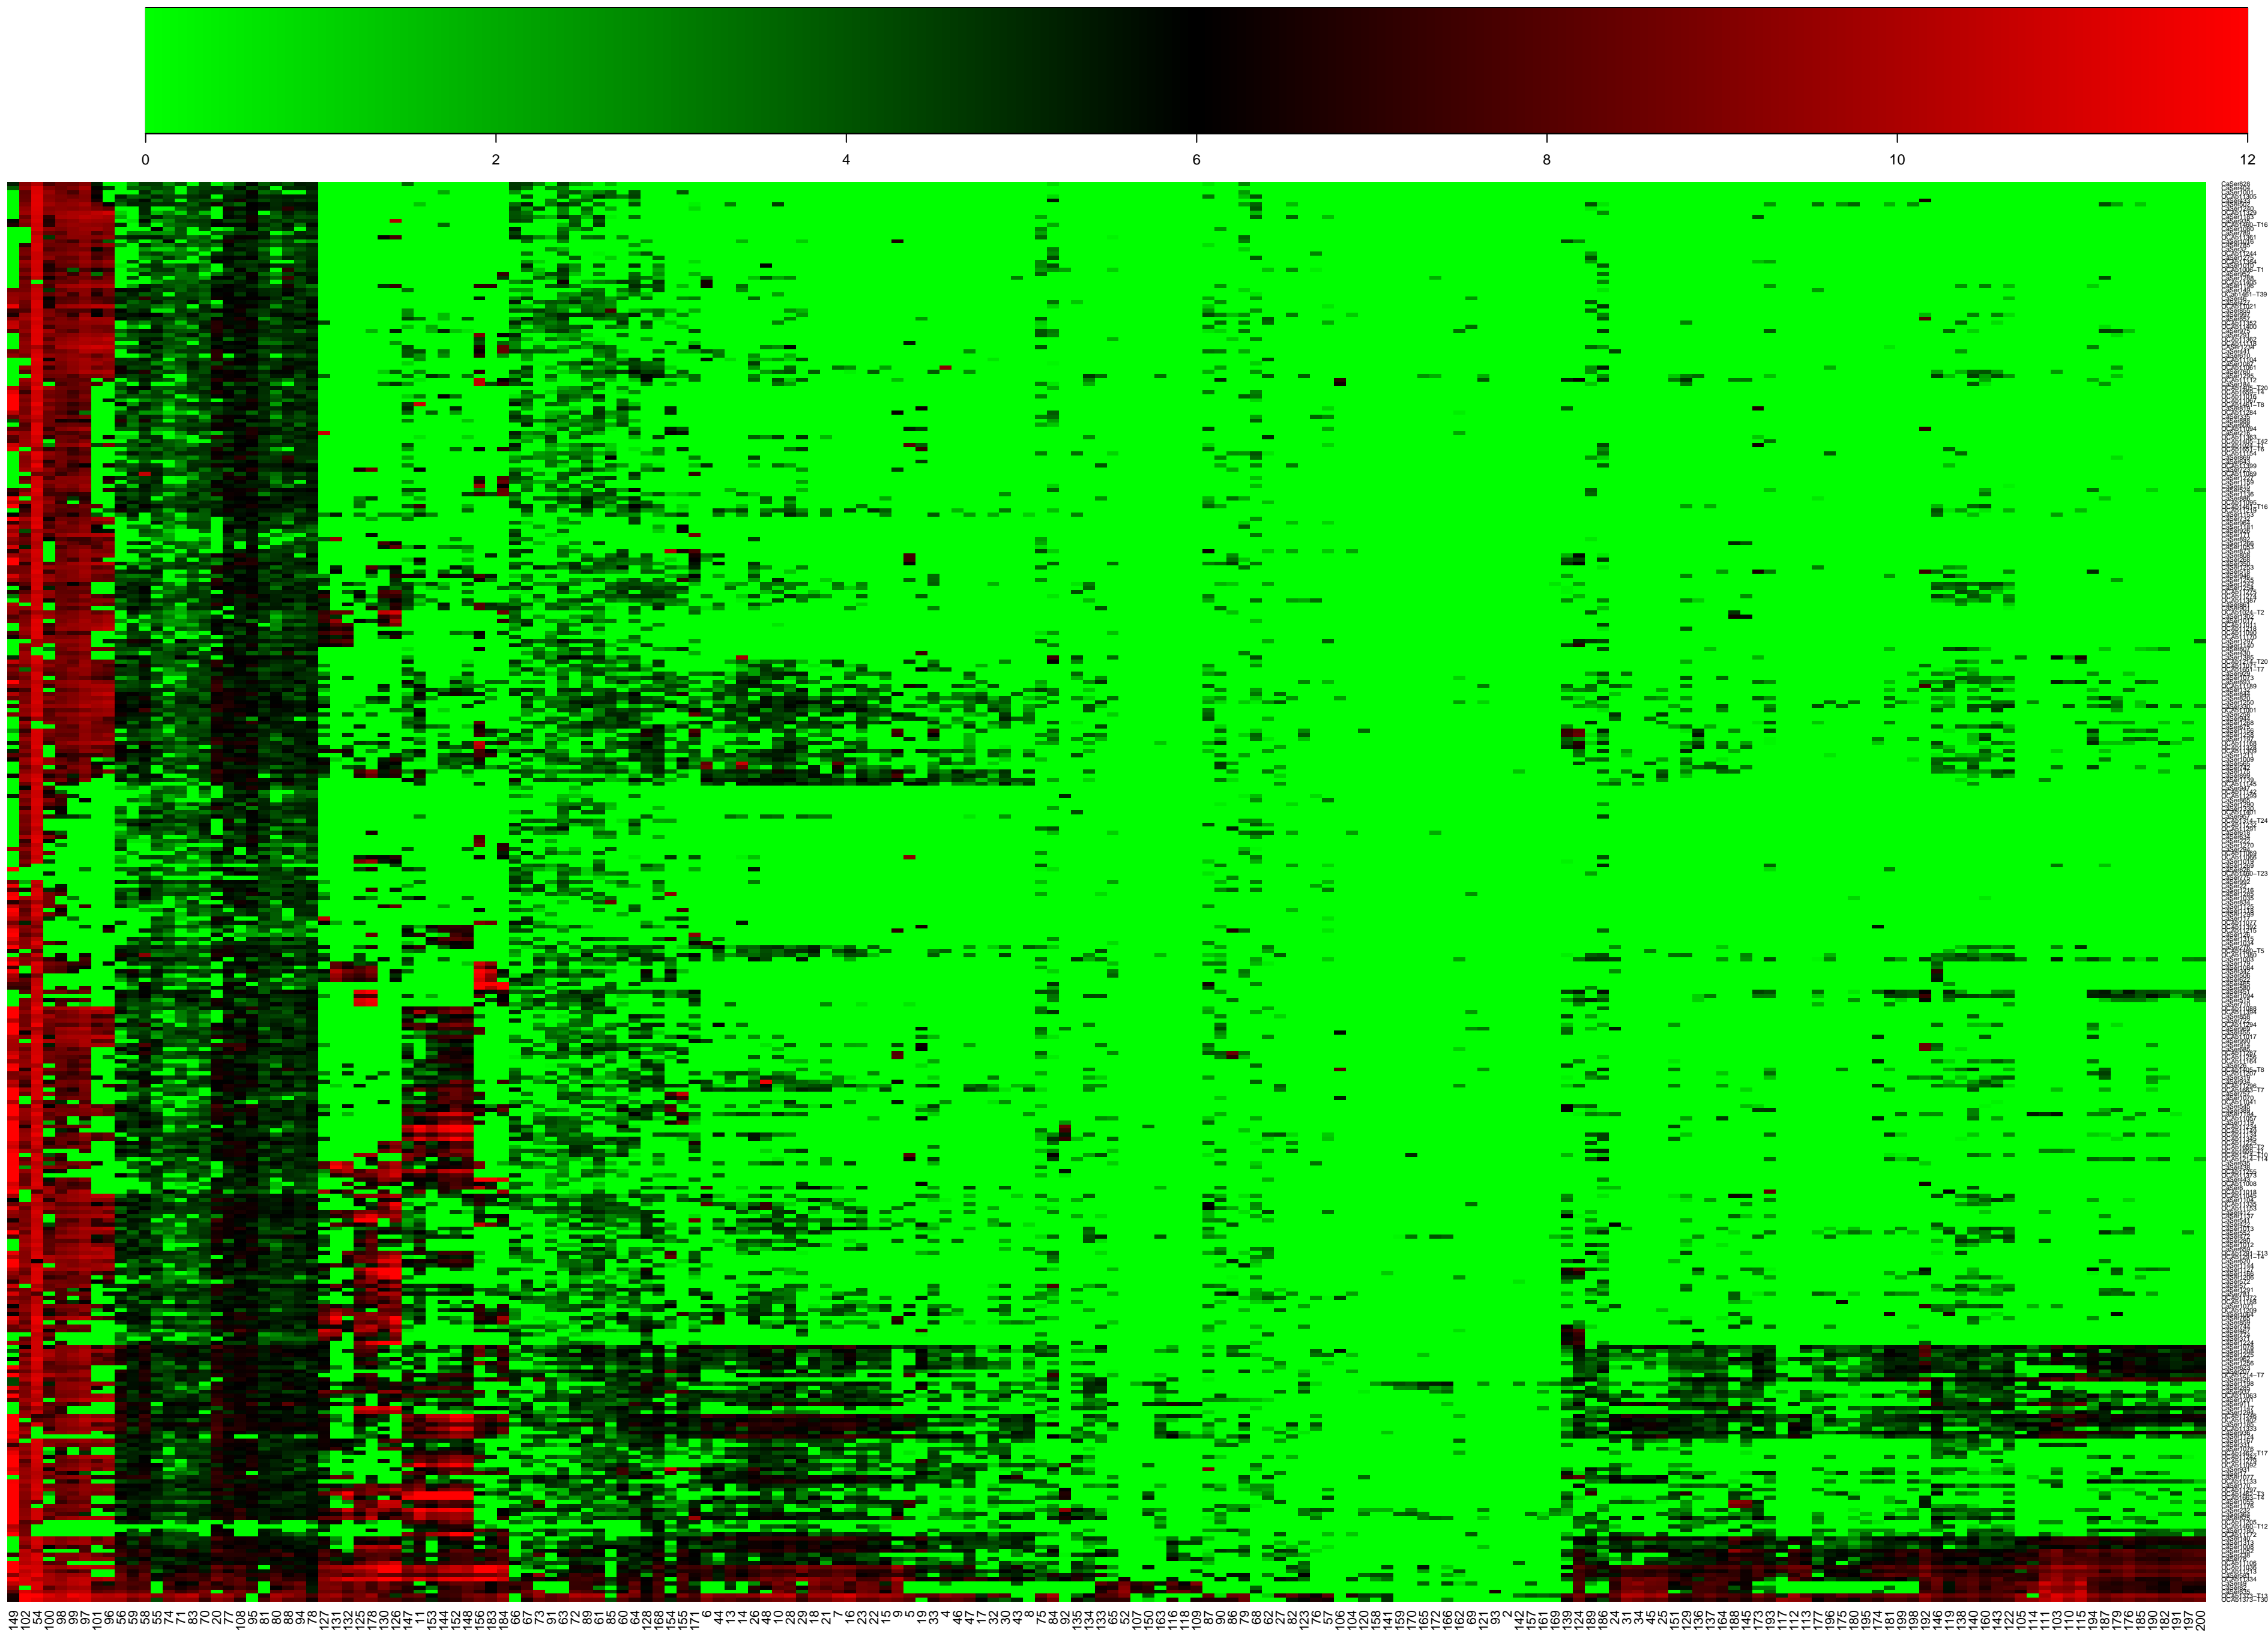



Supplementary Figure 10: Serum anti-glycan IgG antibodies in 348 ovarian cancer serum samples measured on MGBA. a) Dot plots of median fluorescence (MFI) for each glycan in 348 serum samples obtained from 119 patients at different time points. Samples with MFI above 5,000 were plotted at the 5,000 level. The mean of the MFI for the glycan is presented as a red line. b) Heatmap showing clusters of glycans based on serum IgG levels in the samples.

**Supplementary Table 1: List of Glycan conjugated to create multiplex glycan bead array v1.0**

| Glycan IDs | Glycan ID | Name                                                        | Structure                                                                             | Molecular Weight |
|------------|-----------|-------------------------------------------------------------|---------------------------------------------------------------------------------------|------------------|
| 2          | GLYPW_002 | $\alpha$ -Mannosyl derivative                               |    | 221.25           |
| 4          | GLYPW_004 | $\alpha$ -Fuc-Sp                                            |    | 221.25           |
| 5          | GLYPW_005 | $\alpha$ -Rham-Sp                                           |    | 221.25           |
| 6          | GLYPW_006 | $\beta$ -GlcNAc-Sp                                          |    | 278.3            |
| 7          | GLYPW_007 | $\beta$ -GalNAc-Sp                                          |    | 278.3            |
| 8          | GLYPW_008 | Neu5Ac- $\alpha$ -2,3-Gal- $\beta$ -1,4-Glc- $\beta$ -Sp    |     | 690.65           |
| 9          | GLYPW_009 | Neu5Ac- $\alpha$ -2,6-Gal- $\beta$ -1,4-Glc- $\beta$ -Sp    |    | 690.65           |
| 10         | GLYPW_010 | Gal- $\alpha$ -1,4-Gal- $\beta$ -1,4-Glc- $\beta$ -Sp       |     | 561.53           |
| 11         | GLYPW_011 | Gal- $\alpha$ -1,3-Gal- $\beta$ -1,4-Glc- $\beta$ -Sp       |     | 561.53           |
| 13         | GLYPW_016 | $\beta$ -Glc-Sp                                             |  | 278.3            |
| 14         | GLYPW_017 | $\beta$ -Gal-Sp                                             |   | 278.3            |
| 15         | GLYPW_018 | Gal- $\beta$ -1,4-Glc- $\beta$ -Sp                          |   | 399.39           |
| 16         | GLYPW_019 | $\alpha$ -Man-Sp                                            |  | 278.3            |
| 17         | GLYPW_020 | Gal- $\beta$ -1,4-GlcNAc- $\beta$ -Sp                       |   | 440.44           |
| 18         | GLYPW_021 | Gal- $\beta$ -1,3-GlcNAc- $\beta$ -Sp                       |   | 440.44           |
| 19         | GLYPW_022 | Glc- $\alpha$ -1,2-Gal- $\alpha$ -1,3-Glc- $\alpha$ -Sp     |   | 561.53           |
| 20         | GLYPW_023 | $\alpha$ -GalNAc-Sp                                         |   | 278.3            |
| 21         | GLYPW_024 | Gal- $\alpha$ -1,3-Gal- $\beta$ -1,3-GlcNAc- $\beta$ -Sp    |   | 602.58           |
| 22         | GLYPW_025 | Neu5Ac- $\alpha$ -2,3-Gal- $\beta$ -1,3-GlcNAc- $\beta$ -Sp |   | 731.7            |
| 23         | GLYPW_026 | Neu5Ac- $\alpha$ -2,6-Gal- $\beta$ -1,3-GlcNAc- $\beta$ -Sp |   | 731.7            |
| 24         | GLYPW_027 | Neu5Gc- $\alpha$ -2,3-Gal- $\beta$ -1,3-GlcNAc- $\beta$ -Sp |   | 747.7            |

|    |           |                                                                                                                       |  |        |
|----|-----------|-----------------------------------------------------------------------------------------------------------------------|--|--------|
| 25 | GLYPW_028 | Neu5Gc- $\alpha$ -2,6-Gal- $\beta$ -1,3-GlcNAc- $\beta$ -Sp                                                           |  | 747.7  |
| 26 | GLYPW_029 | Gal- $\beta$ -1,3-(Fuc- $\alpha$ -1,4)-GlcNAc- $\beta$ -Sp                                                            |  | 586.26 |
| 27 | GLYPW_030 | Gal- $\beta$ -1,3-GalNAc- $\alpha$ -Sp                                                                                |  | 440.44 |
| 28 | GLYPW_031 | GlcNAc- $\beta$ -1,3-Gal- $\beta$ -1,4-Glc- $\beta$ -Sp                                                               |  | 602.58 |
| 29 | GLYPW_032 | GalNAc- $\beta$ -1,3-Gal- $\beta$ -1,4-Glc- $\beta$ -Sp                                                               |  | 602.58 |
| 30 | GLYPW_033 | Neu5Gc- $\alpha$ -2,3-Gal- $\beta$ -1,4-Glc- $\beta$ -Sp                                                              |  | 706.64 |
| 31 | GLYPW_034 | Neu5Gc- $\alpha$ -2,6-Gal- $\beta$ -1,4-Glc- $\beta$ -Sp                                                              |  | 706.64 |
| 32 | GLYPW_035 | Gal- $\beta$ -1,4-(Fuc- $\alpha$ -1,3)-Glc- $\beta$ -Sp                                                               |  | 545.53 |
| 33 | GLYPW_036 | GlcNAc- $\beta$ -1,6-GlcNAc- $\beta$ -Sp                                                                              |  | 481.49 |
| 34 | GLYPW_037 | 4-P-GlcNAc- $\beta$ -1,6-GlcNAc- $\beta$ -Sp                                                                          |  | 561.47 |
| 43 | GLYPW_046 | GalNAc- $\beta$ -1,4 -Gal- $\beta$ -1,4-Glc- $\beta$ -Sp1<br>[Asialo GM2]                                             |  | 617.6  |
| 44 | GLYPW_047 | Gal- $\beta$ -1,3 -GalNAc- $\beta$ -1,3-Gal- $\beta$ -Sp1                                                             |  | 617.6  |
| 45 | GLYPW_048 | Glc- $\alpha$ -1,2-Gal- $\alpha$ -Sp                                                                                  |  | 399.93 |
| 46 | GLYPW_049 | Gal- $\beta$ -1,4 -(Fuc- $\alpha$ -1,3)-GlcNAc- $\beta$ -1,3 -Gal- $\beta$ -Sp1                                       |  | 763.74 |
| 47 | GLYPW_050 | Neu5Ac- $\alpha$ -2,3-Gal- $\beta$ -1,4 -(Fuc- $\alpha$ -1,3)-Glc- $\beta$ -Sp1<br>[ 3-Sialyl-3-fucosyllactose/ F-SL] |  | 851.8  |
| 48 | GLYPW_051 | GlcNAc- $\beta$ -1,4-GlcNAc- $\beta$ -Sp1                                                                             |  | 496.51 |
| 52 | GLYPW_055 | Gal- $\beta$ -1,3-GalNAc- $\alpha$ -O-Ser (Gal-Tn-Antigen)                                                            |  | 470.43 |
| 54 | GLYPW_057 | GalNAc- $\alpha$ -1,3-(Fuc- $\alpha$ -1,2)-Gal- $\beta$ -Sp 1<br>[Blood A antigen trisaccharide]                      |  | 601.6  |
| 55 | GLYPW_058 | Fuc- $\alpha$ -1,2-Gal- $\beta$ -1,4-GlcNAc- $\beta$ -Sp1<br>[Blood H antigen trisaccharide Type 2]                   |  | 601.6  |

|    |           |                                                                                                                                 |                                                                                      |         |
|----|-----------|---------------------------------------------------------------------------------------------------------------------------------|--------------------------------------------------------------------------------------|---------|
| 56 | GLYPW_059 | Gal- $\alpha$ -1,3-(Fuc- $\alpha$ -1,2)-Gal- $\beta$ -Sp 1 [Blood B antigen trisaccharide]                                      | 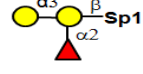   | 560.55  |
| 57 | GLYPW_060 | Fuc- $\alpha$ -1,2-Gal- $\beta$ -1,3-GlcNAc- $\beta$ -1,3-Gal- $\beta$ -1,4-Glc- $\beta$ -Sp [LNFP I]                           |    | 925.88  |
| 58 | GLYPW_061 | Fuc- $\alpha$ -1,2-Gal- $\beta$ -1,4-Glc- $\beta$ -Sp1 [Blood H antigen trisaccharide Type 5]                                   |    | 560.55  |
| 59 | GLYPW_062 | Gal- $\alpha$ -1,3-(Fuc- $\alpha$ -1,2)-Gal- $\beta$ -1,4-Glc- $\beta$ -Sp 1 [Blood B antigen tetrasaccharide]                  |    | 722.69  |
| 60 | GLYPW_063 | (Fuc- $\alpha$ -1,2)-Gal- $\beta$ -1,4 -(Fuc- $\alpha$ -1,3)-GlcNAc- $\beta$ -Sp1 [Lewis Y]                                     |    | 747.74  |
| 61 | GLYPW_064 | (Fuc- $\alpha$ -1,2)-Gal- $\beta$ -1,3-(Fuc- $\alpha$ -1,4)-GlcNAc- $\beta$ -Sp1 [Lewis B]                                      |    | 747.74  |
| 62 | GLYPW_065 | Gal- $\beta$ -1,3-(Fuc- $\alpha$ -1,4)-GlcNAc- $\beta$ -1,3-Gal- $\beta$ -1,4 -(Fuc- $\alpha$ -1,4)-Glc- $\beta$ -Sp1 [Lewis A] |    | 1072.02 |
| 63 | GLYPW_066 | Gal- $\beta$ -1,3-GalNAc- $\beta$ -Sp 1 (T-antigen)                                                                             |   | 455.46  |
| 64 | GLYPW_067 | Gal- $\beta$ -1,3-(Neu5Ac- $\alpha$ -2,6)-GalNAc- $\beta$ -Sp                                                                   |  | 731.7   |
| 65 | GLYPW_068 | Neu5Ac- $\alpha$ -2,6-Gal $\beta$ -1,3-GalNAc- $\beta$ -Sp                                                                      |  | 731.7   |
| 66 | GLYPW_069 | Neu5Ac- $\alpha$ -2,6-Gal $\beta$ -1,3-(Neu5Ac- $\alpha$ -2,6)-GalNAc- $\beta$ -Sp                                              |  | 1022.95 |
| 67 | GLYPW_070 | Neu5Ac- $\alpha$ -2,3-Gal $\beta$ -1,3-(Neu5Ac- $\alpha$ -2,6)-GalNAc- $\beta$ -Sp                                              |  | 1022.95 |
| 68 | GLYPW_071 | Neu5Ac- $\alpha$ -2,6-(Neu5Ac- $\alpha$ -2,3)-Gal $\beta$ -1,3-GalNAc- $\beta$ -Sp                                              |  | 1022.95 |
| 69 | GLYPW_072 | GalNAc- $\beta$ -1,4-(Neu5Ac- $\alpha$ -2,3)-Gal $\beta$ -1,4-Glc- $\beta$ -Sp [GM2]                                            |  | 893.84  |
| 70 | GLYPW_073 | GalNAc- $\beta$ -1,4-(Neu5Ac- $\alpha$ -2,8-Neu5Ac- $\alpha$ -2,3)-Gal $\beta$ -1,4-Glc- $\beta$ -Sp [GD2]                      |  | 1185.09 |

|    |           |                                                                                                   |  |          |
|----|-----------|---------------------------------------------------------------------------------------------------|--|----------|
| 71 | GLYPW_074 | Gal- $\alpha$ -1,4-Gal $\beta$ -1,4-GlcNAc- $\beta$ -Sp1                                          |  | 617.26   |
| 72 | GLYPW_075 | D-Rhamnose-sp                                                                                     |  | 221.25   |
| 73 | GLYPW_076 | Glc- $\alpha$ -1,4-Glc- $\beta$ -Sp1                                                              |  | 414.41   |
| 74 | GLYPW_077 | Glc- $\alpha$ -1,6-Glc- $\alpha$ -1,4-Glc- $\beta$ -Sp1                                           |  | 576.55   |
| 75 | GLYPW_078 | Maltotriose-Sp1                                                                                   |  | 576.55   |
| 76 | GLYPW_079 | Glc- $\alpha$ -1,6-Glc- $\alpha$ -1,6-Glc- $\beta$ -Sp1                                           |  | 576.55   |
| 77 | GLYPW_080 | Maltotetraose- $\beta$ -Sp1                                                                       |  | 738.69   |
| 78 | GLYPW_081 | Maltopentaose- $\beta$ -Sp1                                                                       |  | 900.83   |
| 79 | GLYPW_082 | Maltohexaose- $\beta$ -Sp1                                                                        |  | 1062.97  |
| 80 | GLYPW_083 | Maltoheptaose- $\beta$ -Sp1                                                                       |  | 1225.11  |
| 81 | GLYPW_084 | Acarbose- $\beta$ -Sp1                                                                            |  | 717.71   |
| 82 | GLYPW_085 | D-pentamannuronic acid                                                                            |  | 970.74   |
| 83 | GLYPW_086 | L-pentaguluronic acid                                                                             |  | 970.74   |
| 84 | GLYPW_087 | D-cellose-Sp1                                                                                     |  | 414.41   |
| 85 | GLYPW_088 | Cellopentaose-Sp1                                                                                 |  | 900.83   |
| 86 | GLYPW_089 | $\beta$ -1,4-Xylotetrose-Sp1                                                                      |  | 618.58   |
| 87 | GLYPW_090 | Chitin-trisaccharide-Sp1                                                                          |  | 699.3174 |
| 88 | GLYPW_091 | GlcNAc- $\alpha$ -1,3-(Glc- $\alpha$ -1,2-Glc- $\alpha$ -1,2)Gal- $\alpha$ -1,3-Glc- $\alpha$ -Sp |  | 926.86   |
| 89 | GLYPW_092 | GlcNAc- $\beta$ -1,2-Man- $\alpha$ -Sp                                                            |  | 440.44   |

|     |           |                                                                                  |                                                                                      |        |
|-----|-----------|----------------------------------------------------------------------------------|--------------------------------------------------------------------------------------|--------|
| 90  | GLYPW_093 | Gal- $\beta$ -1,4-(6S)GlcNAc- $\beta$                                            | 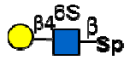  | 520.5  |
| 91  | GLYPW_094 | Neu5Ac- $\alpha$ -2,3-Gal- $\beta$ -Sp1                                          |   | 543.52 |
| 92  | GLYPW_095 | Gal- $\alpha$ -1,3-Gal- $\beta$ -Sp1                                             |   | 414.41 |
| 93  | GLYPW_096 | D-GlcA-Sp                                                                        |   | 251.23 |
| 94  | GLYPW_097 | GlcA- $\beta$ -1-4-GlcNAc- $\alpha$ -1-4-GlcA- $\beta$ -SP                       |    | 630.55 |
| 95  | GLYPW_098 | GlcNAc- $\alpha$ -1-4-GlcA- $\beta$ -1-4-GlcNAc- $\alpha$ -1-4-GlcA- $\beta$ -SP |    | 833.74 |
| 96  | GLYPW_099 | Tobramycin                                                                       |    | 467.51 |
| 97  | GLYPW_100 | Amikacin                                                                         |   | 585.6  |
| 98  | GLYPW_101 | Gentamicin Sulfate                                                               |  | 575.67 |
| 99  | GLYPW_102 | Kanamycin sulfate                                                                |  | 582.58 |
| 100 | GLYPW_103 | Geneticin Disulfate Salt (G418)                                                  |  | 692.71 |
| 101 | GLYPW_104 | Neomycin trisulfate                                                              |  | 908.88 |

|      |           |                                                                                           |                                                                                       |         |
|------|-----------|-------------------------------------------------------------------------------------------|---------------------------------------------------------------------------------------|---------|
| 102  | GLYPW_105 | Sisomycin Sulphate                                                                        | 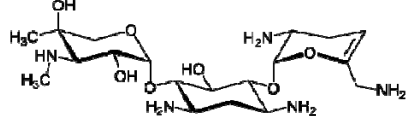    | 692.72  |
| 103  | GLYPW_106 | Gal-β-1,3-GalNAc-β-1,3-Gal-α-1,4-Gal-β-1,4-Glc-β-Sp                                       |    | 926.86  |
| 104  | GLYPW_107 | GlcNAc-β-1,6-(GlcNAc-β-1,3)-Gal-β-1,4-Glc-β-Sp1                                           |     | 820.79  |
| 105  | GLYPW_108 | SGP [N-glycan]                                                                            |     | 2865.76 |
| 106  | GLYPW_109 | Neu5Ac-α-2,8-Neu5Ac-α-2,3-Gal β-1,4-Glc-β-Sp [GD3 ]                                       |    | 981.9   |
| 107  | GLYPW_110 | Neu5Gc-α-2,8-Neu5Ac-α-2,3-Gal β-1,4-Glc-β-Sp [GD3 (Gc-Ac)]                                |    | 997.9   |
| 108  | GLYPW_111 | KDN-α-2,8-Neu5Ac-α-2,3-Gal β-1,4-Glc-β-Sp [GD3 (KDN-Ac)]                                  |  | 940.85  |
| 109* | GLYPW_112 | Neu5Ac-α-2,8-Neu5Gc-α-2,3-Gal β-1,4-Glc-β-Sp [GD3 (Ac-Gc)]                                |  | 997.9   |
| 110  | GLYPW_113 | α-2,8-Neu5Ac-α-2,8-Neu5Ac-α-2,8-Neu5Ac-α-2,3-Gal-β-1,4-Glc-Sp2 [GT3]                      |   | 1594.52 |
| 111  | GLYPW_114 | Neu5Ac-α-2,8-Neu5Ac-α-2,8-Neu5Ac-α-2,8 Neu5Ac-α-2,3-Gal β-1,4-Glc-β-Sp [Neu5Ac-α-2,8-GT3] |  | 1564.41 |
| 112  | GLYPW_115 | Gal β-1,3-GalNAc-β-1,4-(Neu5Ac-α-2,3)-Gal β-1,4-Glc-β- SP1 [GM1a]                         |   | 1070.99 |
| 113  | GLYPW_116 | Gal β-1,3-GalNAc-β-1,4-(Neu5Gc-α-2,3)-Gal β-1,4-Glc-β-SP1 [GM1a (Gc)]                     |   | 1086.99 |
| 114  | GLYPW_117 | GalNAc-β-1,4-(Neu5Gc-α-2,8-Neu5Ac-α-2,3)-Gal β-1,4-Glc-β-Sp [GD2 (Gc)]                    |   | 1216.11 |

|     |             |                                                                                                                            |                                                                                       |         |
|-----|-------------|----------------------------------------------------------------------------------------------------------------------------|---------------------------------------------------------------------------------------|---------|
| 115 | GLYPW_118   | GalNAc- $\beta$ -1,4-(Neu5Ac- $\alpha$ -2,3)-Gal $\beta$ -1,4-Glc- $\beta$ -Sp [GM2 (KDN)]                                 |     | 1070.99 |
| 116 | GLYPW_119   | Neu5Ac- $\alpha$ -2,3-Gal- $\beta$ -1,4-(6S) GlcNA-Sp                                                                      |     | 811.76  |
| 117 | GLYPW_120   | GalNAc- $\beta$ -1,4-GlcNAc- $\beta$ CH <sub>2</sub> CH <sub>2</sub> NH <sub>2</sub> [LacdiNAc]                            |     | 467.47  |
| 118 | GLYPW_121   | GlcNAc- $\beta$ -1,6-(Gal- $\beta$ -1,3)-GalNAc- $\alpha$ -O-Ser                                                           |    | 673.62  |
| 119 | GLYRDC_126  | Gal $\beta$ 1-3GalNAc $\beta$ 1-3Gal -AEAB                                                                                 |     | 545.48  |
| 120 | GLYRDC_022  | Gal $\beta$ 1-4GlcNAc $\beta$ 1-3Gal $\beta$ 1-4GlcNAc $\beta$ 1-3Gal $\beta$ 1-4Glc -AEAB                                 |     | 1072.96 |
| 121 | GLYRDC_023  | Gal $\beta$ 1-4GlcNAc $\beta$ 1-3Gal $\beta$ 1-4GlcNAc $\beta$ 1-3Gal $\beta$ 1-4GlcNAc $\beta$ 1-3Gal $\beta$ 1-4Glc-AEAB |     | 1438.29 |
| 122 | GLYRDC_127  | Fuca1-2Gal $\beta$ 1-3GalNAc $\beta$ 1-3Gal -AEAB                                                                          |    | 691.62  |
| 123 | GLYRDC_0331 | Fuca1-2Gal $\beta$ 1-3GlcNAc $\beta$ 1-3Gal $\beta$ 1-4Glc-AEAB                                                            |  | 853.76  |
| 124 | GLYRDC_0332 | Fuca1-2Gal $\beta$ 1-4GlcNAc $\beta$ 1-3Gal $\beta$ 1-4Glc-AEAB                                                            |  | 853.76  |
| 125 | GLYRDC_128  | GalNAc $\alpha$ 1-3(Fuca1-2)Gal $\beta$ 1-3GalNAc $\beta$ 1-3Gal-AEAB                                                      |   | 894.82  |
| 126 | GLYRDC_0371 | GalNAc $\alpha$ 1-3(Fuca1-2)Gal $\beta$ 1-3GlcNAc $\beta$ 1-3Gal $\beta$ 1-4Glc -AEAB                                      |   | 1056.96 |
| 127 | GLYRDC_0372 | GalNAc $\alpha$ 1-3(Fuca1-2)Gal $\beta$ 1-4GlcNAc $\beta$ 1-3Gal $\beta$ 1-4Glc-AEAB                                       |   | 1056.96 |
| 128 | GLYRDC_0384 | Gal $\alpha$ 1-3(Fuca1-2)Gal $\beta$ 1-3(Fuca1-4)GlcNAc-AEAB                                                               |   | 837.77  |
| 129 | GLYRDC_0385 | Gal $\alpha$ 1-3(Fuca1-2)Gal $\beta$ 1-4(Fuca1-3)GlcNAc -AEAB                                                              |   | 837.77  |



|     |             |                                                                                                |                                                                                      |         |
|-----|-------------|------------------------------------------------------------------------------------------------|--------------------------------------------------------------------------------------|---------|
| 130 | GLYRDC_129  | Gal $\alpha$ 1-3(Fuca $\alpha$ 1-2)Gal $\beta$ 1-3GalNAc $\beta$ 1-3Gal-AEAB                   | 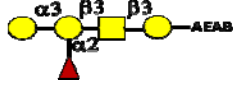   | 853.76  |
| 131 | GLYRDC_0401 | Gal $\alpha$ 1-3(Fuca $\alpha$ 1-2)Gal $\beta$ 1-3GlcNAc $\beta$ 1-3Gal $\beta$ 1-4Glc-AEAB    |    | 1015.9  |
| 132 | GLYRDC_0402 | Gal $\alpha$ 1-3(Fuca $\alpha$ 1-2)Gal $\beta$ 1-4GlcNAc $\beta$ 1-3Gal $\beta$ 1-4Glc-AEAB    |    | 1015.9  |
| 133 | GLYRDC_051  | Gal $\beta$ 1-4(Fuca $\alpha$ 1-3)GlcNAc $\beta$ 1-3Gal $\beta$ 1-4(Fuca $\alpha$ 1-3)Glc-AEAB |    | 999.9   |
| 134 | GLYRDC_052  | Fuca $\alpha$ 1-2Gal $\beta$ 1-4(Fuca $\alpha$ 1-3)GlcNAc $\beta$ 1-3Gal-AEAB                  |    | 837.77  |
| 135 | GLYRDC_054  | Gal $\beta$ 1-3(Fuca $\alpha$ 1-4)GlcNAc $\beta$ 1-3Gal-AEAB                                   |    | 691.62  |
| 136 | GLYRDC_055  | Gal $\beta$ 1-3(Fuca $\alpha$ 1-4)GlcNAc $\beta$ 1-3Gal $\beta$ 1-4(Fuca $\alpha$ 1-3)Glc-AEAB |   | 999.9   |
| 137 | GLYRDC_056  | Fuca $\alpha$ 1-2Gal $\beta$ 1-3(Fuca $\alpha$ 1-4)GlcNAc $\beta$ 1-3Gal-AEAB                  |  | 837.77  |
| 138 | GLYRDC_047  | Neu5Ac $\alpha$ 2-3Gal $\beta$ 1-4(Fuca $\alpha$ 1-3)GlcNAc-AEAB                               |  | 842.72  |
| 139 | GLYRDC_053  | Neu5Ac $\alpha$ 2-3Gal $\beta$ 1-4(Fuca $\alpha$ 1-3)GlcNAc $\beta$ 1-3Gal-AEAB                |  | 1004.86 |
| 140 | GLYRDC_066  | Fuca $\alpha$ 1-2Gal $\beta$ 1-4(Fuca $\alpha$ 1-3)Glc-AEAB                                    |  | 634.57  |
| 141 | GLYRDC_061  | Gal $\beta$ 1-3GlcNAc $\beta$ 1-3Gal $\beta$ 1-4(Fuca $\alpha$ 1-3)Glc-AEAB                    |  | 853.76  |
| 142 | GLYRDC_062  | Neu5Ac $\alpha$ 3Gal $\beta$ 1-4(Fuca $\alpha$ 1-3)Glc-AEAB                                    |  | 801.67  |
| 143 | GLYRDC_063  | Gal $\beta$ 1-4GlcNAc $\beta$ 1-3Gal $\beta$ 1-4(Fuca $\alpha$ 1-3)Glc-AEAB                    |  | 853.76  |
| 144 | GLYRDC_064  | Gal $\alpha$ 1-3Gal $\beta$ 1-4(Fuca $\alpha$ 1-3)Glc-AEAB                                     |  | 650.57  |
| 145 | GLYRDC_067  | GalNAc $\alpha$ 1-3(Fuca $\alpha$ 1-2)Gal $\beta$ 1-4(Fuca $\alpha$ 1-3)Glc-AEAB               |  | 837.77  |

|     |             |                                                                                  |  |         |
|-----|-------------|----------------------------------------------------------------------------------|--|---------|
| 146 | GLYRDC_068  | Gal $\alpha$ 1-3(Fuc $\alpha$ 1-2)Gal $\beta$ 1-4(Fuc $\alpha$ 1-3)Glc-AEAB      |  | 796.71  |
| 147 | GLYRDC_0741 | Gal $\alpha$ 1-3Gal $\beta$ 1-3GlcNAc -AEAB                                      |  | 545.48  |
| 148 | GLYRDC_0742 | Gal $\alpha$ 1-3Gal $\beta$ 1-4GlcNAc -AEAB                                      |  | 545.48  |
| 149 | GLYRDC_077  | Gal $\alpha$ 1-3[Gal $\beta$ 1-4GlcNAc $\beta$ 1-3]2Gal $\beta$ 1-4Glc-AEAB      |  | 1235.09 |
| 150 | GLYRDC_078  | Gal $\alpha$ 1-3[Gal $\beta$ 1-4GlcNAc $\beta$ 1-3]3Gal $\beta$ 1-4Glc-AEAB      |  | 1600.42 |
| 151 | GLYRDC_079  | Gal $\alpha$ 1-3[Gal $\beta$ 1-4GlcNAc $\beta$ 1-3]4Gal $\beta$ 1-4Glc-AEAB      |  | 1964.76 |
| 152 | GLYRDC_075  | Gal $\alpha$ 1-3Gal $\beta$ 1-4(Fuc $\alpha$ 1-3)GlcNAc -AEAB                    |  | 691.62  |
| 153 | GLYRDC_070  | Gal $\alpha$ 1-3Gal $\beta$ 1-4Glc -AEAB                                         |  | 504.43  |
| 154 | GLYRDC_072  | GalNAc $\beta$ 1-3Gal $\alpha$ 1-3Gal $\beta$ 1-4Glc -AEAB                       |  | 707.62  |
| 155 | GLYRDC_073  | Gal $\beta$ 1-3GalNAc $\beta$ 1-3Gal $\alpha$ 1-3Gal $\beta$ 1-4Glc-AEAB         |  | 869.76  |
| 156 | GLYRDC_134  | GalNAc $\alpha$ 1-3GalNAc $\beta$ 1-3Gal $\alpha$ 1-3Gal $\beta$ 1-4Glc -AEAB    |  | 910.82  |
| 157 | GLYRDC_080  | Neu5Ac $\alpha$ 2-3Gal $\beta$ 1-3GlcNAc $\beta$ 1-3Gal-AEAB                     |  | 858.72  |
| 158 | GLYRDC_081  | Neu5Ac $\alpha$ 2-3Gal $\beta$ 1-3GlcNAc $\beta$ 1-3Gal $\beta$ 1-4Glc -AEAB     |  | 1020.86 |
| 159 | GLYRDC_082  | Neu5Ac $\alpha$ 2-3Gal $\beta$ 1-4GlcNAc $\beta$ 1-3Gal-AEAB                     |  | 858.72  |
| 160 | GLYRDC_083  | Neu5Ac $\alpha$ 2-3Gal $\beta$ 1-4GlcNAc $\beta$ 1-3Gal $\beta$ 1-4Glc -AEAB     |  | 1020.86 |
| 161 | GLYRDC_090  | Neu5Ac $\alpha$ 2-3Gal $\beta$ 1-4Glc-AEAB                                       |  | 655.53  |
| 162 | GLYRDC_091  | Neu5Ac $\alpha$ 2-8Neu5Ac $\alpha$ 2-3Gal $\beta$ 1-4Glc-AEAB                    |  | 968.76  |
| 163 | GLYRDC_092  | Neu5Ac $\alpha$ 2-8Neu5Ac $\beta$ 2-8Neu5Ac $\alpha$ 2-3Gal $\beta$ 1-4Glc -AEAB |  | 1282    |

|      |            |                                                                                                               |  |         |
|------|------------|---------------------------------------------------------------------------------------------------------------|--|---------|
| 164  | GLYRDC_093 | GalNAc $\beta$ 1-4(Neu5Ac $\alpha$ 2-3)Gal $\beta$ 1-4Glc-AEAB                                                |  | 858.72  |
| 165  | GLYRDC_094 | GalNAc $\beta$ 1-4(Neu5Ac $\alpha$ 2-8Neu5Ac $\alpha$ 2-3)Gal $\beta$ 1-4Glc -AEAB                            |  | 1171.95 |
| 166  | GLYRDC_095 | GalNAc $\beta$ 1-4(Neu5Ac $\alpha$ 2-8Neu5Ac $\alpha$ 2-8Neu5Ac $\alpha$ 2-3)Gal $\beta$ 1-4Glc-AEAB          |  | 1485.19 |
| 167* | GLYRDC_096 | Gal $\beta$ 1-3GalNAc $\beta$ 1-4(Neu5Ac $\alpha$ 2-3)Gal $\beta$ 1-4Glc-AEAB                                 |  | 1020.86 |
| 168  | GLYRDC_097 | Neu5Ac $\alpha$ 2-3Gal $\beta$ 1-3GalNAc $\beta$ 1-4Gal $\beta$ 1-4Glc-AEAB                                   |  | 1020.86 |
| 169  | GLYRDC_098 | Neu5Ac $\alpha$ 2-3Gal $\beta$ 1-3GalNAc $\beta$ 1-4(Neu5Ac $\alpha$ 2-3)Gal $\beta$ 1-4Glc -AEAB             |  | 1334.09 |
| 170  | GLYRDC_099 | Gal $\beta$ 1-3GalNAc $\beta$ 1-4(Neu5Ac $\alpha$ 2-8Neu5Ac $\alpha$ 2-3)Gal $\beta$ 1-4Glc-AEAB              |  | 1334.09 |
| 171  | GLYRDC_102 | Gal $\beta$ 1-3GalNAc $\beta$ 1-4Gal $\beta$ 1-4Glc-AEAB                                                      |  | 707.62  |
| 172  | GLYRDC_103 | Fuc $\alpha$ 1-2Gal $\beta$ 1-3GalNAc $\beta$ 1-4(Neu5Ac $\alpha$ 2-3)Gal $\beta$ 1-4Glc-AEAB                 |  | 1168    |
| 173  | GLYRDC_104 | GalNAc $\beta$ 1-4Gal $\beta$ 1-4Glc-AEAB                                                                     |  | 545.48  |
| 174  | GLYRDC_120 | Gal $\alpha$ 1-4Gal $\beta$ 1-4Glc-AEAB                                                                       |  | 504.43  |
| 175  | GLYRDC_121 | GalNAc $\beta$ 1-3Gal $\alpha$ 1-4Gal $\beta$ 1-4Glc-AEAB                                                     |  | 707.62  |
| 176  | GLYRDC_136 | Gal $\alpha$ 1-4Gal $\beta$ 1-4GlcNAc-AEAB                                                                    |  | 545.48  |
| 177  | GLYRDC_171 | Neu5Ac $\alpha$ 2-3Gal $\alpha$ 1-4Gal $\beta$ 1-4Glc-AEAB                                                    |  | 817.67  |
| 178  | GLYRDC_124 | GalNAc $\alpha$ 1-3(Fuc $\alpha$ 1-2)Gal $\beta$ 1-3GalNAc $\beta$ 1-3Gal $\alpha$ 1-4Gal $\beta$ 1-4Glc-AEAB |  | 1219.09 |
| 179  | GLYRDC_122 | Gal $\beta$ 1-3GalNAc $\beta$ 1-3Gal $\alpha$ 1-4Gal $\beta$ 1-4Glc -AEAB                                     |  | 869.76  |

|     |               |                                                   |  |         |
|-----|---------------|---------------------------------------------------|--|---------|
| 180 | GLYRDC_123    | Fuca1-2Galβ1-3GalNAcβ1-3Galα1-4Galβ1-4Glc-AEAB    |  | 1015.9  |
| 181 | GLYRDC_130    | Neu5Acα2-3Galβ1-3GalNAcβ1-3Gal-AEAB               |  | 858.72  |
| 182 | GLYRDC_131    | Neu5Acα2-3Galβ1-3GalNAcβ1-3Galα1-4Galβ1-4Glc-AEAB |  | 1183    |
| 183 | GLYRDC_132    | GalNAcα1-3GalNAcβ1-3Galα1-4Galβ1-4Glc-AEAB        |  | 910.82  |
| 184 | GLYRDC_133    | GalNAcα1-3GalNAcβ1-3Gal-AEAB                      |  | 586.54  |
| 185 | GLYRDC_180    | GlcAβ1-3Galβ1-4Glc-AEAB                           |  | 540     |
| 186 | GLYRDC_181    | GlcAβ1-3Galβ1-3GlcNAcβ1-3Galβ1-4Glc-AEAB          |  | 883.75  |
| 187 | GLYRDC_163    | Fuca1-2Galβ1-4(Fuca1-2)Glc-AEAB                   |  | 634.57  |
| 188 | GLYRDC_164    | GalNAcα1-3(Fuca1-2)Galβ1-4(Fuca1-2)Glc-AEAB       |  | 837.77  |
| 189 | GLYRDC_1911   | Galβ1-3GlcNAcβ1-3Galα1-4Galβ1-4Glc-AEAB           |  | 869.76  |
| 190 | GLYRDC_1912   | Galβ1-4GlcNAcβ1-3Galα1-4Galβ1-4Glc-AEAB           |  | 869.76  |
| 191 | GLYRDC_1951   | NeuAcα2-3Galβ1-3GlcNAcβ1-3Galα1-4Galβ1-4Glc-AEAB  |  | 1183    |
| 192 | GLYRDC_2011   | Fuca1-2Galβ1-3GlcNAcβ1-3Galα1-3Galβ1-4Glc-AEAB    |  | 1015.9  |
| 193 | GLYRDC_111    | Galβ1-4(Neu5Acα2-3)Galβ1-4Glc-AEAB                |  | 817.67  |
| 194 | GLYRDC_174    | Galβ1-3GalNAcβ1-4Galβ1-3GalNAcβ1-4Galβ1-4Glc-AEAB |  | 1072.95 |
| 195 | GLYRDC_GLU314 | <u>Maltotetraose DP4-AEAB</u>                     |  | 666.57  |

|     |               |                                |                                                                                    |         |
|-----|---------------|--------------------------------|------------------------------------------------------------------------------------|---------|
| 196 | GLYRDC_GLU315 | <u>Maltopentaose DP5 -AEAB</u> | 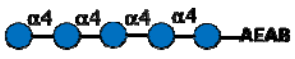 | 828.71  |
| 197 | GLYRDC_GLU316 | <u>Maltohexaose DP6-AEAB</u>   |  | 990.85  |
| 198 | GLYRDC_GLU317 | <u>Maltoheptaose DP7 -AEAB</u> |  | 1152.99 |
| 199 | GLYRDC_GLU318 | <u>Maltooctaose DP8 -AEAB</u>  |  | 1315.13 |
| 200 | GLYRDC_GLU319 | <u>Maltononaose DP9 -AEAB</u>  |  | 1477.27 |

Gly#109 was analyzed in OvCaR Samples for anti-glycan IgG

Gly#167 was analyzed for anti-Glycan IgM in type-1 diabetes samples.

Sp:  $\text{OCH}_2\text{CH}_2\text{CH}_2\text{NH}_2$

Sp1:  $\text{NH}(\text{CH}_3)\text{OCH}_2\text{CH}_2\text{NH}_2$

Sp2:  $\text{O}(\text{CH}_2)_3\text{NHCOCH}_2(\text{OCH}_2\text{CH}_2)_5\text{CH}_2\text{CH}_2\text{NH}_2$

AEAB: 2,6-diaminopyridine (DAP) and 2-amino(N-aminoethyl) benzamide

|                                                                                     |              |                                                                                     |               |                                                                                     |             |
|-------------------------------------------------------------------------------------|--------------|-------------------------------------------------------------------------------------|---------------|-------------------------------------------------------------------------------------|-------------|
|  | Gal          |  | <u>GalNAc</u> |  | <u>GalN</u> |
|  | <u>Glc</u>   |  | <u>GlcNAc</u> |  | <u>GlcN</u> |
|  | Man          |  | <u>ManNAc</u> |  | <u>ManN</u> |
|  | <u>L-Fuc</u> |  | <u>Xyl</u>    |  | <u>Rham</u> |
|  | Neu5Ac       |  | Neu5Gc        |  | KDN         |
|  | <u>GlcA</u>  |  | <u>GalA</u>   |  | KDO         |
|  | <u>IdoA</u>  |  | <u>ManA</u>   |  | <u>Hep</u>  |

**Supplementary Table 2:** List of lectins used for characterization of the multiplex glycan bead array.

| <b>Lectin</b>                          | <b>Acronym</b> | <b>Sugar Specificity</b>                       |
|----------------------------------------|----------------|------------------------------------------------|
| <i>Ricinus communis II</i>             | RCAII          | Gal, GalNAc                                    |
| <i>Erythrina cristagali</i>            | ECL            | Gal $\beta$ 4GlcNAc                            |
| Succinylated Wheat Germ                | SuWGA          | GlcNAc                                         |
| <i>Lens clunaris</i>                   | LCA            | $\alpha$ Man, $\alpha$ Glc                     |
| <i>Ricinus communis I</i>              | RCAI           | Gal                                            |
| Jacalin                                | Jacalin        | Gal $\beta$ 3GalNAc                            |
| <i>Pisium sativum</i>                  | PSA            | $\alpha$ Man, $\alpha$ Glc                     |
| Succinylated Concanavalin A            | SuConA         | $\alpha$ Man, $\alpha$ Glc                     |
| Soyabean                               | SBA            | $\alpha$ > $\beta$ GalNAc                      |
| <i>Dolichos biflorus</i>               | DBA            | $\alpha$ GalNAc                                |
| <i>Galanthus nivalis</i>               | GNL            | $\alpha$ Man                                   |
| <i>Psophocarpus tetragonolobus I</i>   | PTLI           | GalNAc, Gal                                    |
| <i>Phaseolus vulgaris E</i>            | PHA-E          | bisecting Gal $\beta$ 1-4GlcNAc $\beta$ 1-2Man |
| <i>Lycopersicon esculentum</i>         | LEL            | (GlcNAc) <sub>2-4</sub>                        |
| <i>Maackia amurensisI</i>              | MALI           | Gal $\beta$ 4GlcNAc                            |
| <i>Vicia villosa</i>                   | VVL            | GalNAc                                         |
| <i>Solanum tuberosum</i>               | STL            | (GlcNAc) <sub>2-4</sub>                        |
| <i>Phaseolus vulgaris L</i>            | PHA-L          |                                                |
| <i>Amaranthus caudatus</i>             | ACL            | Gal $\beta$ 3GalNAc                            |
| Peanut                                 | PNA            | Gal $\beta$ 3GalNAc                            |
| <i>Ulex europaeus</i>                  | UEA            | $\alpha$ Fuc                                   |
| <i>Narcissus pseudonarcissus</i>       | NPL            | $\alpha$ Man                                   |
| <i>Euonymus europaeus</i>              | EEL            | Gal $\alpha$ 3Gal                              |
| <i>Griffonia simplicifolia II</i>      | GSLII          | $\alpha$ or $\beta$ GlcNAc                     |
| <i>Lotus tetragonolobus</i>            | LTL            | $\alpha$ Fuc                                   |
| <i>Sambucus nigra</i>                  | SNA            | Neu5Ac $\alpha$ 6Gal/GalNAc                    |
| <i>Bauhinia purpurea</i>               | BPL            | Gal $\beta$ 3GalNAc                            |
| <i>Hippeastrum hybrid</i>              | HHL            | $\alpha$ Man                                   |
| <i>Musa Paradisiaca</i>                | MPL            | $\alpha$ Man, $\alpha$ Glc                     |
| <i>Sophora japonica</i>                | SJA            | $\beta$ GalNAc                                 |
| <i>Datura Stramonium</i>               | DSL            | (GlcNAc) <sub>2-4</sub>                        |
| <i>Wisteria Floribunda</i>             | WFL            | GalNAc                                         |
| <i>Griffonia simplicifolia I</i>       | GSLI           | $\alpha$ Gal, $\alpha$ GalNAc                  |
| Concanavalin A                         | ConA           | $\alpha$ Man, $\alpha$ Glc                     |
| <i>Psophocarpus tetragonolobusII</i>   | PTLII          | GalNAc,Gal                                     |
| Griffonia simplicifolia I isolectin B4 | BSIB4          | $\alpha$ Gal                                   |
| <i>Maackia amurensisII</i>             | MALII          | Neu5Ac $\alpha$ 3Gal $\beta$ 3GalNAc           |
| <i>Aleuria aurantia</i>                | AAL            | Fuc $\alpha$ 6GlcNac                           |
| Wheat Germ                             | WGA            | GlcNAc                                         |

**Supplementary Table 3:** Commercial and in house raised anti-glycan antibodies used to characterized suspension glycan array.

| <b>Anti-Glycan antibody</b> | <b>Company</b> | <b>Clone ID</b> | <b>Cat#</b> | <b>Lot No</b> | <b>Ig Type</b> |
|-----------------------------|----------------|-----------------|-------------|---------------|----------------|
| CA19.9                      | ABCAM          |                 | ab3982      | GR72650-15    | IgM            |
| Le <sup>x</sup>             | ABCAM          |                 | ab3358      | GR158608-1    | IgM            |
| Le <sup>y</sup> IgM         | ABCAM          |                 | ab3359      | GR147932-9    | IgM            |
| SSEA3                       | In Lab*        | MC631           |             |               | IgM            |
| GM1                         | In Lab*        | D0131           |             |               | IgM            |
| Gal $\alpha$ 1,3            | In Lab*        |                 |             |               | IgM            |
| Sle <sup>x</sup>            | In Lab*        | SNH3            |             |               | IgM            |
| GA1                         | In Lab*        | D079            |             |               | IgM            |
| Le <sup>b</sup>             | ABCAM          |                 | ab3968      | GR133794-1    | IgG            |
| Blood Group H2              | ABCAM          |                 | ab33404     | GR174650-1    | IgG            |
| CA19.9                      | US Bio         | 5G17            | C0075-31    | L12102625     | IgG            |
| Le <sup>a</sup>             | ABCAM          |                 | ab3967      | GR117120-8    | IgG            |
| Le <sup>Y</sup> IgG         | In Lab*        | E2014           |             |               | IgG            |
| Muc1                        | Fitzgerald     | M3A106          | 10-R-M129C  | 1714          | IgG            |
| Muc1                        | BBI solutions  |                 | BM236-V2G9  | NA            | IgG            |
| mouse anti-Goat IgG HRP     | Pierce         | Poly clonal     |             |               | IgG            |
| Rat IgG                     | Pierce         |                 |             |               | IgG            |

Muc1, Rat IgG and mouse anti-goat antibodies were used as negative control.

All antibodies were used at a dilution of 1:100 in 1% BSA in PBS (w/v).

\*These monoclonal antibodies were produced in laboratory by immunizing intact cells into mice. Individual clones were identified by inhibition studies (unpublished results).

NA: Not Available

**Supplementary Table 4:** Frequency and percentage positive samples for anti-glycan IgM antibody in human subjects (n=613).

| Glycan IDs | Glycan    | Below Cutoff (n) | Above Cutoff (n) | Percentage Positive | Cutoff MFI (Mean+3SD) |
|------------|-----------|------------------|------------------|---------------------|-----------------------|
| 2          | GLYPW_002 | 274              | 339              | 55.3                | 587                   |
| 4          | GLYPW_004 | 352              | 260              | 42.5                | 60                    |
| 5          | GLYPW_005 | 612              | 0                | 0                   | 41                    |
| 6          | GLYPW_006 | 7                | 605              | 98.9                | 51                    |
| 7          | GLYPW_007 | 137              | 475              | 77.6                | 59                    |
| 8          | GLYPW_008 | 326              | 286              | 46.7                | 38                    |
| 9          | GLYPW_009 | 568              | 45               | 7.3                 | 67                    |
| 10         | GLYPW_010 | 12               | 600              | 98                  | 74                    |
| 11         | GLYPW_011 | 158              | 455              | 74.2                | 54                    |
| 13         | GLYPW_016 | 35               | 577              | 94.3                | 62                    |
| 14         | GLYPW_017 | 6                | 606              | 99                  | 61                    |
| 15         | GLYPW_018 | 105              | 507              | 82.8                | 121                   |
| 16         | GLYPW_019 | 50               | 563              | 91.8                | 59                    |
| 17         | GLYPW_020 | 95               | 517              | 84.5                | 52                    |
| 18         | GLYPW_021 | 38               | 575              | 93.8                | 41                    |
| 19         | GLYPW_022 | 44               | 568              | 92.8                | 70                    |
| 20         | GLYPW_023 | 11               | 602              | 98.2                | 45                    |
| 21         | GLYPW_024 | 477              | 135              | 22.1                | 46                    |
| 22         | GLYPW_025 | 612              | 0                | 0                   | 43                    |
| 23         | GLYPW_026 | 450              | 163              | 26.6                | 45                    |
| 24         | GLYPW_027 | 572              | 41               | 6.7                 | 37                    |
| 25         | GLYPW_028 | 500              | 113              | 18.4                | 40                    |
| 26         | GLYPW_029 | 564              | 48               | 7.8                 | 55                    |
| 27         | GLYPW_030 | 256              | 357              | 58.2                | 35                    |
| 28         | GLYPW_031 | 522              | 90               | 14.7                | 30                    |
| 29         | GLYPW_032 | 187              | 426              | 69.5                | 33                    |
| 30         | GLYPW_033 | 567              | 45               | 7.4                 | 62                    |
| 31         | GLYPW_034 | 598              | 14               | 2.3                 | 32                    |
| 32         | GLYPW_035 | 613              | 0                | 0                   | 57                    |
| 33         | GLYPW_036 | 613              | 0                | 0                   | 26                    |
| 34         | GLYPW_037 | 585              | 27               | 4.4                 | 35                    |
| 43         | GLYPW_046 | 45               | 568              | 92.7                | 72                    |
| 44         | GLYPW_047 | 68               | 544              | 88.9                | 65                    |
| 45         | GLYPW_048 | 450              | 163              | 26.6                | 53                    |
| 46         | GLYPW_049 | 613              | 0                | 0                   | 55                    |
| 47         | GLYPW_050 | 114              | 499              | 81.4                | 38                    |
| 48         | GLYPW_051 | 24               | 587              | 96.1                | 79                    |
| 52         | GLYPW_055 | 425              | 187              | 30.6                | 60                    |



|    |           |     |     |      |    |
|----|-----------|-----|-----|------|----|
| 54 | GLYPW_057 | 12  | 601 | 98   | 75 |
| 55 | GLYPW_058 | 141 | 472 | 77   | 38 |
| 56 | GLYPW_059 | 193 | 420 | 68.5 | 44 |
| 57 | GLYPW_060 | 360 | 253 | 41.3 | 43 |
| 58 | GLYPW_061 | 294 | 319 | 52   | 41 |
| 59 | GLYPW_062 | 104 | 509 | 83   | 39 |
| 60 | GLYPW_063 | 319 | 294 | 48   | 48 |
| 61 | GLYPW_064 | 322 | 291 | 47.5 | 39 |
| 62 | GLYPW_065 | 279 | 334 | 54.5 | 77 |
| 63 | GLYPW_066 | 17  | 596 | 97.2 | 36 |
| 64 | GLYPW_067 | 613 | 0   | 0    | 35 |
| 65 | GLYPW_068 | 596 | 17  | 2.8  | 37 |
| 66 | GLYPW_069 | 613 | 0   | 0    | 33 |
| 67 | GLYPW_070 | 613 | 0   | 0    | 22 |
| 68 | GLYPW_071 | 610 | 3   | 0.5  | 32 |
| 69 | GLYPW_072 | 136 | 477 | 77.8 | 42 |
| 70 | GLYPW_073 | 210 | 403 | 65.7 | 32 |
| 71 | GLYPW_074 | 128 | 485 | 79.1 | 35 |
| 72 | GLYPW_075 | 244 | 369 | 60.2 | 38 |
| 73 | GLYPW_076 | 91  | 522 | 85.2 | 28 |
| 74 | GLYPW_077 | 67  | 546 | 89.1 | 41 |
| 75 | GLYPW_078 | 131 | 482 | 78.6 | 31 |
| 76 | GLYPW_079 | 154 | 459 | 74.9 | 42 |
| 77 | GLYPW_080 | 185 | 428 | 69.8 | 21 |
| 78 | GLYPW_081 | 180 | 433 | 70.6 | 39 |
| 79 | GLYPW_082 | 173 | 440 | 71.8 | 32 |
| 80 | GLYPW_083 | 237 | 376 | 61.3 | 36 |
| 81 | GLYPW_084 | 82  | 531 | 86.6 | 21 |
| 82 | GLYPW_085 | 83  | 530 | 86.5 | 30 |
| 83 | GLYPW_086 | 202 | 411 | 67   | 38 |
| 84 | GLYPW_087 | 6   | 607 | 99   | 35 |
| 85 | GLYPW_088 | 232 | 381 | 62.2 | 32 |
| 86 | GLYPW_089 | 58  | 555 | 90.5 | 33 |
| 87 | GLYPW_090 | 21  | 592 | 96.6 | 35 |
| 88 | GLYPW_091 | 179 | 434 | 70.8 | 30 |
| 89 | GLYPW_092 | 613 | 0   | 0    | 33 |
| 90 | GLYPW_093 | 603 | 10  | 1.6  | 40 |
| 91 | GLYPW_094 | 525 | 88  | 14.4 | 38 |
| 92 | GLYPW_095 | 213 | 400 | 65.3 | 31 |
| 93 | GLYPW_096 | 416 | 197 | 32.1 | 38 |
| 94 | GLYPW_097 | 606 | 7   | 1.1  | 40 |
| 95 | GLYPW_098 | 613 | 0   | 0    | 24 |
| 96 | GLYPW_099 | 582 | 31  | 5.1  | 52 |

|     |            |     |     |      |     |
|-----|------------|-----|-----|------|-----|
| 97  | GLYPW_100  | 409 | 204 | 33.3 | 70  |
| 98  | GLYPW_101  | 605 | 8   | 1.3  | 58  |
| 99  | GLYPW_102  | 480 | 133 | 21.7 | 61  |
| 100 | GLYPW_103  | 613 | 0   | 0    | 28  |
| 101 | GLYPW_104  | 368 | 245 | 40   | 47  |
| 102 | GLYPW_105  | 591 | 21  | 3.4  | 69  |
| 103 | GLYPW_106  | 491 | 122 | 19.9 | 43  |
| 104 | GLYPW_107  | 324 | 289 | 47.1 | 168 |
| 105 | GLYPW_108  | 590 | 22  | 3.6  | 44  |
| 106 | GLYPW_109  | 610 | 2   | 0.3  | 39  |
| 107 | GLYPW_110  | 605 | 7   | 1.1  | 57  |
| 108 | GLYPW_111  | 487 | 126 | 20.6 | 54  |
| 110 | GLYPW_113  | 589 | 23  | 3.8  | 37  |
| 111 | GLYPW_114  | 612 | 0   | 0    | 65  |
| 112 | GLYPW_115  | 32  | 580 | 94.8 | 45  |
| 113 | GLYPW_116  | 282 | 330 | 53.9 | 63  |
| 114 | GLYPW_117  | 109 | 503 | 82.2 | 64  |
| 115 | GLYPW_118  | 356 | 256 | 41.8 | 30  |
| 116 | GLYPW_119  | 415 | 197 | 32.2 | 44  |
| 117 | GLYPW_120  | 612 | 0   | 0    | 49  |
| 118 | GLYPW_121  | 305 | 307 | 50.2 | 47  |
| 119 | GLYRDC_126 | 161 | 452 | 73.7 | 25  |
| 120 | GLYRDC_022 | 28  | 585 | 95.4 | 24  |
| 121 | GLYRDC_023 | 105 | 508 | 82.9 | 39  |
| 122 | GLYRDC_127 | 556 | 57  | 9.3  | 33  |
| 123 | GLYRDC_331 | 20  | 593 | 96.7 | 30  |
| 124 | GLYRDC_332 | 17  | 596 | 97.2 | 22  |
| 125 | GLYRDC_128 | 512 | 101 | 16.5 | 34  |
| 126 | GLYRDC_371 | 361 | 252 | 41.1 | 27  |
| 127 | GLYRDC_372 | 41  | 572 | 93.3 | 36  |
| 128 | GLYRDC_384 | 472 | 141 | 23   | 29  |
| 129 | GLYRDC_385 | 20  | 593 | 96.7 | 27  |
| 130 | GLYRDC_129 | 293 | 320 | 52.2 | 31  |
| 131 | GLYRDC_401 | 147 | 466 | 76   | 33  |
| 132 | GLYRDC_402 | 18  | 595 | 97.1 | 38  |
| 133 | GLYRDC_051 | 589 | 24  | 3.9  | 33  |
| 134 | GLYRDC_052 | 554 | 59  | 9.6  | 32  |
| 135 | GLYRDC_054 | 500 | 113 | 18.4 | 27  |
| 136 | GLYRDC_055 | 16  | 597 | 97.4 | 55  |
| 137 | GLYRDC_056 | 583 | 30  | 4.9  | 31  |
| 138 | GLYRDC_047 | 368 | 245 | 40   | 26  |
| 139 | GLYRDC_053 | 178 | 435 | 71   | 28  |
| 140 | GLYRDC_066 | 370 | 243 | 39.6 | 26  |

|     |            |     |     |      |    |
|-----|------------|-----|-----|------|----|
| 141 | GLYRDC_061 | 553 | 60  | 9.8  | 38 |
| 142 | GLYRDC_062 | 166 | 447 | 72.9 | 27 |
| 143 | GLYRDC_063 | 521 | 92  | 15   | 43 |
| 144 | GLYRDC_064 | 219 | 394 | 64.3 | 27 |
| 145 | GLYRDC_067 | 403 | 210 | 34.3 | 31 |
| 146 | GLYRDC_068 | 420 | 193 | 31.5 | 32 |
| 147 | GLYRDC_741 | 96  | 517 | 84.3 | 26 |
| 148 | GLYRDC_742 | 367 | 246 | 40.1 | 32 |
| 149 | GLYRDC_077 | 163 | 450 | 73.4 | 23 |
| 150 | GLYRDC_078 | 339 | 274 | 44.7 | 31 |
| 151 | GLYRDC_079 | 8   | 605 | 98.7 | 32 |
| 152 | GLYRDC_075 | 138 | 475 | 77.5 | 30 |
| 153 | GLYRDC_070 | 339 | 274 | 44.7 | 40 |
| 154 | GLYRDC_072 | 215 | 398 | 64.9 | 36 |
| 155 | GLYRDC_073 | 32  | 581 | 94.8 | 27 |
| 156 | GLYRDC_134 | 4   | 609 | 99.3 | 20 |
| 157 | GLYRDC_080 | 497 | 116 | 18.9 | 30 |
| 158 | GLYRDC_081 | 464 | 149 | 24.3 | 26 |
| 159 | GLYRDC_082 | 417 | 196 | 32   | 23 |
| 160 | GLYRDC_083 | 593 | 20  | 3.3  | 32 |
| 161 | GLYRDC_090 | 599 | 14  | 2.3  | 27 |
| 162 | GLYRDC_091 | 495 | 118 | 19.2 | 22 |
| 163 | GLYRDC_092 | 544 | 69  | 11.3 | 51 |
| 164 | GLYRDC_093 | 364 | 249 | 40.6 | 33 |
| 165 | GLYRDC_094 | 610 | 3   | 0.5  | 33 |
| 166 | GLYRDC_095 | 362 | 251 | 40.9 | 31 |
| 167 | GLYRDC_096 | 205 | 408 | 66.6 | 36 |
| 168 | GLYRDC_097 | 308 | 305 | 49.8 | 34 |
| 169 | GLYRDC_098 | 541 | 72  | 11.7 | 25 |
| 170 | GLYRDC_099 | 186 | 427 | 69.7 | 27 |
| 171 | GLYRDC_102 | 73  | 540 | 88.1 | 32 |
| 172 | GLYRDC_103 | 338 | 275 | 44.9 | 22 |
| 173 | GLYRDC_104 | 162 | 451 | 73.6 | 34 |
| 174 | GLYRDC_120 | 357 | 256 | 41.8 | 44 |
| 175 | GLYRDC_121 | 301 | 312 | 50.9 | 38 |
| 176 | GLYRDC_136 | 444 | 169 | 27.6 | 36 |
| 177 | GLYRDC_171 | 514 | 99  | 16.2 | 48 |
| 178 | GLYRDC_124 | 459 | 154 | 25.1 | 35 |
| 179 | GLYRDC_122 | 333 | 280 | 45.7 | 57 |
| 180 | GLYRDC_123 | 564 | 49  | 8    | 49 |
| 181 | GLYRDC_130 | 315 | 298 | 48.6 | 14 |
| 182 | GLYRDC_131 | 576 | 37  | 6    | 29 |
| 183 | GLYRDC_132 | 41  | 572 | 93.3 | 36 |

|     |               |     |     |      |    |
|-----|---------------|-----|-----|------|----|
| 184 | GLYRDC_133    | 39  | 574 | 93.6 | 31 |
| 185 | GLYRDC_180    | 227 | 386 | 63   | 38 |
| 186 | GLYRDC_181    | 570 | 43  | 7    | 43 |
| 187 | GLYRDC_163    | 320 | 293 | 47.8 | 32 |
| 188 | GLYRDC_164    | 445 | 168 | 27.4 | 33 |
| 189 | GLYRDC_1911   | 261 | 352 | 57.4 | 32 |
| 190 | GLYRDC_1912   | 274 | 339 | 55.3 | 33 |
| 191 | GLYRDC_1951   | 313 | 300 | 48.9 | 33 |
| 192 | GLYRDC_2011   | 365 | 248 | 40.5 | 28 |
| 193 | GLYRDC_111    | 588 | 25  | 4.1  | 24 |
| 194 | GLYRDC_174    | 540 | 73  | 11.9 | 26 |
| 195 | GLYRDC_GLU314 | 403 | 210 | 34.3 | 44 |
| 196 | GLYRDC_GLU315 | 389 | 224 | 36.5 | 30 |
| 197 | GLYRDC_GLU316 | 581 | 32  | 5.2  | 34 |
| 198 | GLYRDC_GLU317 | 543 | 70  | 11.4 | 33 |
| 199 | GLYRDC_GLU318 | 373 | 240 | 39.2 | 29 |
| 200 | GLYRDC_GLU319 | 589 | 24  | 3.9  | 42 |

Cutoff value is based on the mean + 3SD of blank controls in quadruplicate (without serum).

A sample is considered positive if net (background subtracted) MFI is above the mean+3SD of blank controls.

MFI: Median Fluorescence Intensities
